# Supplementary material for: Full-Length Spatial Transcriptomics Reveals the Unexplored Isoform Diversity of the Myocardium Post-MI
Source: Front Genet. 2022 Jul 22;13:912572. doi: 10.3389/fgene.2022.912572 (PMC9354982; doi:10.3389/fgene.2022.912572)
Supplement: Supplementary file 1 [file Table2.XLSX]

## Sheet: supplementary_table_2
RANK	DB	ID	ALT_ID	CONSENSUS	TP	TP%	FP	FP%	ENR_RATIO	SCORE_THR	PVALUE	LOG_PVALUE	EVALUE	LOG_EVALUE	QVALUE	LOG_QVALUE
1	db/RNA/Ray2013_rbp_Mus_musculus.meme	RNCMPT00215	PCBP3	HUUUCCCU	174	69.05	679	51.48	1.34	3.9	0.000486	-7.63	0.00194	-6.24	0.00168	-6.39
2	db/RNA/Ray2013_rbp_Mus_musculus.meme	RNCMPT00051	RBM38	GUGUGUG	82	32.54	283	21.46	1.52	6.6	0.000886	-7.03	0.00354	-5.64	0.00168	-6.39
3	db/RNA/Ray2013_rbp_Mus_musculus.meme	RNCMPT00062	KHDRBS1	UAAAAGG	100	39.68	365	27.67	1.44	4.7	0.00126	-6.68	0.00504	-5.29	0.00168	-6.39
4	db/RNA/Ray2013_rbp_Mus_musculus.meme	RNCMPT00239	PCBP1	CCUUUCCC	19	7.54	81	6.14	1.27	7.9	0.248	-1.39	0.994	-0.01	0.248	-1.39
#	SEA (Simple Enrichment Analysis): Version 5.4.1 compiled on Aug 25 2021 at 17:37:48
#	The format of this file is described at https://meme-suite.org/meme/doc/sea-output-format.html.
#	sea --verbosity 1 --oc . --thresh 10.0 --align center --p IBZm.fasta --n IBZm.cmp_ref.fasta --m db/RNA/Ray2013_rbp_Mus_musculus.meme
