# Supplementary material for: Full-Length Spatial Transcriptomics Reveals the Unexplored Isoform Diversity of the Myocardium Post-MI
Source: Front Genet. 2022 Jul 22;13:912572. doi: 10.3389/fgene.2022.912572 (PMC9354982; doi:10.3389/fgene.2022.912572)
Supplement: Supplementary file 2 [file Table3.XLSX]

## Sheet: description
name

## Sheet: IvsBZ
transcript

## Sheet: IvsRZ1
transcript

## Sheet: IvsRZ2
transcript

## Sheet: BZvsRZ1
transcript

## Sheet: BZvsRZ2
transcript

## Sheet: RZ1vsRZ2
transcript
