# Supplementary material for: Full-Length Spatial Transcriptomics Reveals the Unexplored Isoform Diversity of the Myocardium Post-MI
Source: Front Genet. 2022 Jul 22;13:912572. doi: 10.3389/fgene.2022.912572 (PMC9354982; doi:10.3389/fgene.2022.912572)
Supplement: Supplementary file 4 [file Table4.XLSX]

## Sheet: Tabelle1
Gene	Primer #	sequence
Pdlim5	1	GATCCTTGCCCAGATCACTG
Pdlim5	2	AGGGCTCAGAGTCACTGTAC
Pdlim5	3	AGGTGAAGCTCCAGATGACG
Pdlim5	4	ATTTGACCAGTACAGAGAAATGC
Pdlim5	5	GGATAGCAGGTCACTATCCTC
Pdlim5	6	CTCTGGGATACACTTGGCATG
Pdlim5	7	CTGTGCCTTCAGGGCTATTAC
Actc1	1	AGGTCATCACCATTGGCAAC
Actc1	2	TGCGGATATCGATGTCACAC
Actc1	3	CTGGTATTGCCGATCGTATG
Actc1	4	TCCAGACAGAGTATTTACGCTC
Actc1	5	ATGGCAGATGCTGACTCGAG
Actc1	6	TGTTGGGGACTTCAGAACAC
Actc1	7	CTGTACAATGACTGATGAGAGATGG
Actc1	8	CCTGAGCGTAAATACTCTGTCTG
Tpm1	1	TGGTCATCATCGAGAGCGAC
Tpm1	2	GAGCCTCCAGTGACTTCAAG
Tpm1	3	TCCTCTGCAGCCATTAATGC
