# Supplementary material for: Full-Length Spatial Transcriptomics Reveals the Unexplored Isoform Diversity of the Myocardium Post-MI
Source: Front Genet. 2022 Jul 22;13:912572. doi: 10.3389/fgene.2022.912572 (PMC9354982; doi:10.3389/fgene.2022.912572)
Supplement: Supplementary file 5 [file Table1.XLSX]

## Sheet: A
gene	combined_pvalue	adjusted_pvalue
Rpl7	5.55e-17	3.17198e-15
Ankrd23	5.55e-17	3.17198e-15
Rpl31	5.55e-17	3.17198e-15
Col3a1	5.55e-17	3.17198e-15
Col5a2	5.55e-17	3.17198e-15
Eef1b2	5.55e-17	3.17198e-15
Fn1	5.55e-17	3.17198e-15
Rpl37a	5.55e-17	3.17198e-15
Des	5.55e-17	3.17198e-15
Ptma	5.55e-17	3.17198e-15
Col6a3	5.55e-17	3.17198e-15
Actr3	5.55e-17	3.17198e-15
Arpc5	5.55e-17	3.17198e-15
Gas5	5.55e-17	3.17198e-15
Atp1b1	5.55e-17	3.17198e-15
Fcer1g	5.55e-17	3.17198e-15
Tagln2	5.55e-17	3.17198e-15
Vim	5.55e-17	3.17198e-15
Surf4	5.55e-17	3.17198e-15
Col5a1	5.55e-17	3.17198e-15
Rpl12	5.55e-17	3.17198e-15
Gsn	5.55e-17	3.17198e-15
Rpl35	5.55e-17	3.17198e-15
Xirp2	5.55e-17	3.17198e-15
Atp5g3	5.55e-17	3.17198e-15
Rcn1	5.55e-17	3.17198e-15
Actc1	5.55e-17	3.17198e-15
Thbs1	5.55e-17	3.17198e-15
Pdia3	5.55e-17	3.17198e-15
Serf2	5.55e-17	3.17198e-15
B2m	5.55e-17	3.17198e-15
Fbn1	5.55e-17	3.17198e-15
Sirpa	5.55e-17	3.17198e-15
Rrbp1	5.55e-17	3.17198e-15
Cst3	5.55e-17	3.17198e-15
Rpn2	5.55e-17	3.17198e-15
Tgm2	5.55e-17	3.17198e-15
Ctsa	5.55e-17	3.17198e-15
Pmepa1	5.55e-17	3.17198e-15
Ctsz	5.55e-17	3.17198e-15
Rps21	5.55e-17	3.17198e-15
Fabp5	5.55e-17	3.17198e-15
Anxa5	5.55e-17	3.17198e-15
Postn	5.55e-17	3.17198e-15
Serp1	5.55e-17	3.17198e-15
Rps3a1	5.55e-17	3.17198e-15
Lmna	5.55e-17	3.17198e-15
Krtcap2	5.55e-17	3.17198e-15
Tpm3	5.55e-17	3.17198e-15
S100a4	5.55e-17	3.17198e-15
S100a6	5.55e-17	3.17198e-15
Sprr1a	5.55e-17	3.17198e-15
S100a11	5.55e-17	3.17198e-15
S100a10	5.55e-17	3.17198e-15
Ctss	5.55e-17	3.17198e-15
Ecm1	5.55e-17	3.17198e-15
Olfml3	5.55e-17	3.17198e-15
Rhoc	5.55e-17	3.17198e-15
Rpl34	5.55e-17	3.17198e-15
H2afz	5.55e-17	3.17198e-15
Acadm	5.55e-17	3.17198e-15
Rps20	5.55e-17	3.17198e-15
Sdcbp	5.55e-17	3.17198e-15
Tpm2	5.55e-17	3.17198e-15
Tln1	5.55e-17	3.17198e-15
Clta	5.55e-17	3.17198e-15
Col15a1	5.55e-17	3.17198e-15
Sec61b	5.55e-17	3.17198e-15
Txn1	5.55e-17	3.17198e-15
Tnc	5.55e-17	3.17198e-15
Plin2	5.55e-17	3.17198e-15
Rps6	5.55e-17	3.17198e-15
Akr1a1	5.55e-17	3.17198e-15
Prdx1	5.55e-17	3.17198e-15
Rps8	5.55e-17	3.17198e-15
Col16a1	5.55e-17	3.17198e-15
Fabp3	5.55e-17	3.17198e-15
Sdc3	5.55e-17	3.17198e-15
Laptm5	5.55e-17	3.17198e-15
Cd52	5.55e-17	3.17198e-15
Sh3bgrl3	5.55e-17	3.17198e-15
Stmn1	5.55e-17	3.17198e-15
Rsrp1	5.55e-17	3.17198e-15
Rpl11	5.55e-17	3.17198e-15
Id3	5.55e-17	3.17198e-15
C1qb	5.55e-17	3.17198e-15
C1qc	5.55e-17	3.17198e-15
C1qa	5.55e-17	3.17198e-15
Cdc42	5.55e-17	3.17198e-15
Hspg2	5.55e-17	3.17198e-15
Ddost	5.55e-17	3.17198e-15
Nppb	5.55e-17	3.17198e-15
Nppa	5.55e-17	3.17198e-15
Rpl22	5.55e-17	3.17198e-15
Gnb1	5.55e-17	3.17198e-15
Hadha	5.55e-17	3.17198e-15
Hadhb	5.55e-17	3.17198e-15
Emilin1	5.55e-17	3.17198e-15
Ywhah	5.55e-17	3.17198e-15
Wdr1	5.55e-17	3.17198e-15
Sod3	5.55e-17	3.17198e-15
Rpl9	5.55e-17	3.17198e-15
Uchl1	5.55e-17	3.17198e-15
Hopx	5.55e-17	3.17198e-15
Igfbp7	5.55e-17	3.17198e-15
Pf4	5.55e-17	3.17198e-15
Sept11	5.55e-17	3.17198e-15
Spp1	5.55e-17	3.17198e-15
Rpl5	5.55e-17	3.17198e-15
Dynll1	5.55e-17	3.17198e-15
Rplp0	5.55e-17	3.17198e-15
Rpl6	5.55e-17	3.17198e-15
Erp29	5.55e-17	3.17198e-15
Myl2	5.55e-17	3.17198e-15
Atp2a2	5.55e-17	3.17198e-15
Hspb1	5.55e-17	3.17198e-15
Serpine1	5.55e-17	3.17198e-15
Gnb2	5.55e-17	3.17198e-15
Pcolce	5.55e-17	3.17198e-15
Actb	5.55e-17	3.17198e-15
Fscn1	5.55e-17	3.17198e-15
Arpc1b	5.55e-17	3.17198e-15
Rpl21	5.55e-17	3.17198e-15
Col1a2	5.55e-17	3.17198e-15
Ndufa4	5.55e-17	3.17198e-15
Ndufa5	5.55e-17	3.17198e-15
Calu	5.55e-17	3.17198e-15
Flnc	5.55e-17	3.17198e-15
Zyx	5.55e-17	3.17198e-15
Hnrnpa2b1	5.55e-17	3.17198e-15
Capg	5.55e-17	3.17198e-15
Tmsb10	5.55e-17	3.17198e-15
Loxl3	5.55e-17	3.17198e-15
Rpn1	5.55e-17	3.17198e-15
Fbln2	5.55e-17	3.17198e-15
Arpc4	5.55e-17	3.17198e-15
Rpl32	5.55e-17	3.17198e-15
Mfap5	5.55e-17	3.17198e-15
Ptms	5.55e-17	3.17198e-15
Emp1	5.55e-17	3.17198e-15
Mgp	5.55e-17	3.17198e-15
Ldhb	5.55e-17	3.17198e-15
Rps9	5.55e-17	3.17198e-15
Tnni3	5.55e-17	3.17198e-15
Rpl28	5.55e-17	3.17198e-15
Rps5	5.55e-17	3.17198e-15
Selenow	5.55e-17	3.17198e-15
Ckm	5.55e-17	3.17198e-15
Apoe	5.55e-17	3.17198e-15
Rps19	5.55e-17	3.17198e-15
Pld3	5.55e-17	3.17198e-15
Rps16	5.55e-17	3.17198e-15
Ech1	5.55e-17	3.17198e-15
Actn4	5.55e-17	3.17198e-15
Cox7a1	5.55e-17	3.17198e-15
Tyrobp	5.55e-17	3.17198e-15
Fxyd5	5.55e-17	3.17198e-15
Rcn3	5.55e-17	3.17198e-15
Rps11	5.55e-17	3.17198e-15
Rpl13a	5.55e-17	3.17198e-15
Hrc	5.55e-17	3.17198e-15
Ftl1	5.55e-17	3.17198e-15
Rpl18	5.55e-17	3.17198e-15
Emp3	5.55e-17	3.17198e-15
Idh2	5.55e-17	3.17198e-15
Ctsc	5.55e-17	3.17198e-15
Serpinh1	5.55e-17	3.17198e-15
Rps3	5.55e-17	3.17198e-15
Hbb-bt	5.55e-17	3.17198e-15
Hbb-bs	5.55e-17	3.17198e-15
Rpl27a	5.55e-17	3.17198e-15
Rps13	5.55e-17	3.17198e-15
Rps15a	5.55e-17	3.17198e-15
Coro1a	5.55e-17	3.17198e-15
Cox6a2	5.55e-17	3.17198e-15
Cox8b	5.55e-17	3.17198e-15
Ifitm2	5.55e-17	3.17198e-15
Ifitm3	5.55e-17	3.17198e-15
Rnh1	5.55e-17	3.17198e-15
Irf7	5.55e-17	3.17198e-15
Rplp2	5.55e-17	3.17198e-15
Ctsd	5.55e-17	3.17198e-15
Lsp1	5.55e-17	3.17198e-15
Cttn	5.55e-17	3.17198e-15
Col4a1	5.55e-17	3.17198e-15
Col4a2	5.55e-17	3.17198e-15
Lamp1	5.55e-17	3.17198e-15
Sorbs2	5.55e-17	3.17198e-15
Slc25a4	5.55e-17	3.17198e-15
Spcs3	5.55e-17	3.17198e-15
Lpl	5.55e-17	3.17198e-15
Ifi30	5.55e-17	3.17198e-15
Rpl18a	5.55e-17	3.17198e-15
Bst2	5.55e-17	3.17198e-15
Tpm4	5.55e-17	3.17198e-15
Hmox1	5.55e-17	3.17198e-15
Calr	5.55e-17	3.17198e-15
Mt2	5.55e-17	3.17198e-15
Mt1	5.55e-17	3.17198e-15
Cyba	5.55e-17	3.17198e-15
Rpl13	5.55e-17	3.17198e-15
Acta1	5.55e-17	3.17198e-15
Itgb1	5.55e-17	3.17198e-15
Col5a3	5.55e-17	3.17198e-15
Hspa8	5.55e-17	3.17198e-15
Mcam	5.55e-17	3.17198e-15
Rps25	5.55e-17	3.17198e-15
Tagln	5.55e-17	3.17198e-15
Cryab	5.55e-17	3.17198e-15
Cox5a	5.55e-17	3.17198e-15
Loxl1	5.55e-17	3.17198e-15
Hexa	5.55e-17	3.17198e-15
Pkm	5.55e-17	3.17198e-15
Rplp1	5.55e-17	3.17198e-15
Rpl4	5.55e-17	3.17198e-15
Ppib	5.55e-17	3.17198e-15
Tpm1	5.55e-17	3.17198e-15
Anxa2	5.55e-17	3.17198e-15
Eef1a1	5.55e-17	3.17198e-15
Ctsh	5.55e-17	3.17198e-15
Rbp1	5.55e-17	3.17198e-15
Rpl29	5.55e-17	3.17198e-15
Gnai2	5.55e-17	3.17198e-15
Gpx1	5.55e-17	3.17198e-15
Shisa5	5.55e-17	3.17198e-15
Myl3	5.55e-17	3.17198e-15
Rpsa	5.55e-17	3.17198e-15
Rpl14	5.55e-17	3.17198e-15
Rps12	5.55e-17	3.17198e-15
Ccn2	5.55e-17	3.17198e-15
Marcks	5.55e-17	3.17198e-15
Lilrb4a	5.55e-17	3.17198e-15
Pln	5.55e-17	3.17198e-15
Psap	5.55e-17	3.17198e-15
Mif	5.55e-17	3.17198e-15
Chchd10	5.55e-17	3.17198e-15
Col6a2	5.55e-17	3.17198e-15
Cstb	5.55e-17	3.17198e-15
Ptbp1	5.55e-17	3.17198e-15
Rps15	5.55e-17	3.17198e-15
Eef2	5.55e-17	3.17198e-15
Ckap4	5.55e-17	3.17198e-15
Hsp90b1	5.55e-17	3.17198e-15
Dcn	5.55e-17	3.17198e-15
Lum	5.55e-17	3.17198e-15
Csrp2	5.55e-17	3.17198e-15
Lyz2	5.55e-17	3.17198e-15
Lrp1	5.55e-17	3.17198e-15
Myl6	5.55e-17	3.17198e-15
Rpl41	5.55e-17	3.17198e-15
Rps26	5.55e-17	3.17198e-15
Cd63	5.55e-17	3.17198e-15
Aebp1	5.55e-17	3.17198e-15
Ppia	5.55e-17	3.17198e-15
Sec61g	5.55e-17	3.17198e-15
Mdh1	5.55e-17	3.17198e-15
Rps27a	5.55e-17	3.17198e-15
Rtn4	5.55e-17	3.17198e-15
Hba-a1	5.55e-17	3.17198e-15
Hba-a2	5.55e-17	3.17198e-15
Npm1	5.55e-17	3.17198e-15
Rack1	5.55e-17	3.17198e-15
Sqstm1	5.55e-17	3.17198e-15
Adamts2	5.55e-17	3.17198e-15
Gpx3	5.55e-17	3.17198e-15
Sparc	5.55e-17	3.17198e-15
Mfap4	5.55e-17	3.17198e-15
Ubb	5.55e-17	3.17198e-15
2410006H16Rik	5.55e-17	3.17198e-15
Rpl26	5.55e-17	3.17198e-15
Cd68	5.55e-17	3.17198e-15
Eif4a1	5.55e-17	3.17198e-15
Eif5a	5.55e-17	3.17198e-15
Gabarap	5.55e-17	3.17198e-15
Pfn1	5.55e-17	3.17198e-15
Eno3	5.55e-17	3.17198e-15
Serpinf1	5.55e-17	3.17198e-15
Rpl23a	5.55e-17	3.17198e-15
Ccl2	5.55e-17	3.17198e-15
Ccl7	5.55e-17	3.17198e-15
Ccl8	5.55e-17	3.17198e-15
Ccl9	5.55e-17	3.17198e-15
Ccl6	5.55e-17	3.17198e-15
Wfdc17	5.55e-17	3.17198e-15
Vmp1	5.55e-17	3.17198e-15
Nme1	5.55e-17	3.17198e-15
Col1a1	5.55e-17	3.17198e-15
Atp5g1	5.55e-17	3.17198e-15
Rpl23	5.55e-17	3.17198e-15
Rpl19	5.55e-17	3.17198e-15
Tcap	5.55e-17	3.17198e-15
Fkbp10	5.55e-17	3.17198e-15
Rab5c	5.55e-17	3.17198e-15
Grn	5.55e-17	3.17198e-15
Ddx5	5.55e-17	3.17198e-15
Prkar1a	5.55e-17	3.17198e-15
Rpl38	5.55e-17	3.17198e-15
H3f3b	5.55e-17	3.17198e-15
Timp2	5.55e-17	3.17198e-15
Lgals3bp	5.55e-17	3.17198e-15
Actg1	5.55e-17	3.17198e-15
P4hb	5.55e-17	3.17198e-15
Arhgdia	5.55e-17	3.17198e-15
Pdia6	5.55e-17	3.17198e-15
Rps7	5.55e-17	3.17198e-15
Rps29	5.55e-17	3.17198e-15
Actn1	5.55e-17	3.17198e-15
Npc2	5.55e-17	3.17198e-15
Ltbp2	5.55e-17	3.17198e-15
Calm1	5.55e-17	3.17198e-15
Lgmn	5.55e-17	3.17198e-15
Ifi27l2a	5.55e-17	3.17198e-15
Serpina3n	5.55e-17	3.17198e-15
Hsp90aa1	5.55e-17	3.17198e-15
Crip1	5.55e-17	3.17198e-15
Gdi2	5.55e-17	3.17198e-15
BC005537	5.55e-17	3.17198e-15
Serpinb6a	5.55e-17	3.17198e-15
Tubb2a	5.55e-17	3.17198e-15
Txndc5	5.55e-17	3.17198e-15
Aspn	5.55e-17	3.17198e-15
Gadd45g	5.55e-17	3.17198e-15
Prelid1	5.55e-17	3.17198e-15
Pdlim7	5.55e-17	3.17198e-15
Tgfbi	5.55e-17	3.17198e-15
Ctla2a	5.55e-17	3.17198e-15
Ctsl	5.55e-17	3.17198e-15
Ftl1-ps1	5.55e-17	3.17198e-15
Cox7c	5.55e-17	3.17198e-15
Rps23	5.55e-17	3.17198e-15
Ckmt2	5.55e-17	3.17198e-15
Btf3	5.55e-17	3.17198e-15
Rpl15	5.55e-17	3.17198e-15
Rps24	5.55e-17	3.17198e-15
Stab1	5.55e-17	3.17198e-15
Tnnc1	5.55e-17	3.17198e-15
Lgals3	5.55e-17	3.17198e-15
Myh6	5.55e-17	3.17198e-15
Myh7	5.55e-17	3.17198e-15
Ctsb	5.55e-17	3.17198e-15
Clu	5.55e-17	3.17198e-15
Loxl2	5.55e-17	3.17198e-15
Bmp1	5.55e-17	3.17198e-15
Itm2b	5.55e-17	3.17198e-15
Esd	5.55e-17	3.17198e-15
Lcp1	5.55e-17	3.17198e-15
Tpt1	5.55e-17	3.17198e-15
Selenop	5.55e-17	3.17198e-15
Rpl37	5.55e-17	3.17198e-15
Dap	5.55e-17	3.17198e-15
Rpl30	5.55e-17	3.17198e-15
Cox6c	5.55e-17	3.17198e-15
Pabpc1	5.55e-17	3.17198e-15
Ywhaz	5.55e-17	3.17198e-15
Cthrc1	5.55e-17	3.17198e-15
Col14a1	5.55e-17	3.17198e-15
Ly6e	5.55e-17	3.17198e-15
Ly6a	5.55e-17	3.17198e-15
Rpl8	5.55e-17	3.17198e-15
Mb	5.55e-17	3.17198e-15
Myh9	5.55e-17	3.17198e-15
C1qtnf6	5.55e-17	3.17198e-15
Lgals1	5.55e-17	3.17198e-15
Rpl3	5.55e-17	3.17198e-15
Atf4	5.55e-17	3.17198e-15
Tspo	5.55e-17	3.17198e-15
Tuba1b	5.55e-17	3.17198e-15
Tuba1a	5.55e-17	3.17198e-15
Tuba1c	5.55e-17	3.17198e-15
Itga5	5.55e-17	3.17198e-15
Litaf	5.55e-17	3.17198e-15
Ap2m1	5.55e-17	3.17198e-15
Rpl35a	5.55e-17	3.17198e-15
Fstl1	5.55e-17	3.17198e-15
Ccdc80	5.55e-17	3.17198e-15
Rpl24	5.55e-17	3.17198e-15
App	5.55e-17	3.17198e-15
Atp5o	5.55e-17	3.17198e-15
Atp6v0c	5.55e-17	3.17198e-15
Rps2	5.55e-17	3.17198e-15
Atp6v0e	5.55e-17	3.17198e-15
Rps10	5.55e-17	3.17198e-15
Rpl10a	5.55e-17	3.17198e-15
Rps28	5.55e-17	3.17198e-15
Tapbp	5.55e-17	3.17198e-15
Rps18	5.55e-17	3.17198e-15
H2-K1	5.55e-17	3.17198e-15
Slc39a7	5.55e-17	3.17198e-15
Clic1	5.55e-17	3.17198e-15
H2-D1	5.55e-17	3.17198e-15
Tubb5	5.55e-17	3.17198e-15
Ppp1r18	5.55e-17	3.17198e-15
Gm42418	5.55e-17	3.17198e-15
Trem2	5.55e-17	3.17198e-15
C3	5.55e-17	3.17198e-15
Lox	5.55e-17	3.17198e-15
Ppic	5.55e-17	3.17198e-15
Rps14	5.55e-17	3.17198e-15
Cd74	5.55e-17	3.17198e-15
Csf1r	5.55e-17	3.17198e-15
Tubb6	5.55e-17	3.17198e-15
Rpl17	5.55e-17	3.17198e-15
Tcirg1	5.55e-17	3.17198e-15
Efemp2	5.55e-17	3.17198e-15
Cfl1	5.55e-17	3.17198e-15
Ltbp3	5.55e-17	3.17198e-15
Neat1	5.55e-17	3.17198e-15
Fau	5.55e-17	3.17198e-15
Eef1g	5.55e-17	3.17198e-15
Fth1	5.55e-17	3.17198e-15
Ms4a7	5.55e-17	3.17198e-15
Mpeg1	5.55e-17	3.17198e-15
Anxa1	5.55e-17	3.17198e-15
Acta2	5.55e-17	3.17198e-15
Ankrd1	5.55e-17	3.17198e-15
Pgam1	5.55e-17	3.17198e-15
Rbm3	5.55e-17	3.17198e-15
Timp1	5.55e-17	3.17198e-15
Rpl39	5.55e-17	3.17198e-15
Lamp2	5.55e-17	3.17198e-15
Fhl1	5.55e-17	3.17198e-15
Bgn	5.55e-17	3.17198e-15
Flna	5.55e-17	3.17198e-15
Maged1	5.55e-17	3.17198e-15
Msn	5.55e-17	3.17198e-15
Rps4x	5.55e-17	3.17198e-15
Sh3bgrl	5.55e-17	3.17198e-15
Rpl36a	5.55e-17	3.17198e-15
Morf4l2	5.55e-17	3.17198e-15
Tmsb4x	5.55e-17	3.17198e-15
mt-Nd2	5.55e-17	3.17198e-15
mt-Atp8	5.55e-17	3.17198e-15
mt-Nd3	5.55e-17	3.17198e-15
mt-Nd4l	5.55e-17	3.17198e-15
mt-Nd5	5.55e-17	3.17198e-15
Arpc2	1.11022e-16	5.9615e-15
Capn2	1.11022e-16	5.9615e-15
Serping1	1.11022e-16	5.9615e-15
Fkbp1a	1.11022e-16	5.9615e-15
Cnn3	1.11022e-16	5.9615e-15
Ostc	1.11022e-16	5.9615e-15
Anp32b	1.11022e-16	5.9615e-15
Ppp1cc	1.11022e-16	5.9615e-15
Kdelr2	1.11022e-16	5.9615e-15
Sec61a1	1.11022e-16	5.9615e-15
Capns1	1.11022e-16	5.9615e-15
Ucp2	1.11022e-16	5.9615e-15
Colgalt1	1.11022e-16	5.9615e-15
Cox4i1	1.11022e-16	5.9615e-15
Atp5b	1.11022e-16	5.9615e-15
Dync1h1	1.11022e-16	5.9615e-15
Hnrnpk	1.11022e-16	5.9615e-15
Arf4	1.11022e-16	5.9615e-15
Aco2	1.11022e-16	5.9615e-15
Atp5j	1.11022e-16	5.9615e-15
Fndc1	1.11022e-16	5.9615e-15
Myl12b	1.11022e-16	5.9615e-15
Myl12a	1.11022e-16	5.9615e-15
Nars	1.11022e-16	5.9615e-15
Acaa2	1.11022e-16	5.9615e-15
mt-Nd1	1.11022e-16	5.9615e-15
mt-Atp6	1.11022e-16	5.9615e-15
mt-Nd4	1.11022e-16	5.9615e-15
Csrp1	2.22045e-16	1.13822e-14
Pea15a	2.22045e-16	1.13822e-14
Myl9	2.22045e-16	1.13822e-14
Adam15	2.22045e-16	1.13822e-14
Capza1	2.22045e-16	1.13822e-14
Cald1	2.22045e-16	1.13822e-14
Snrpg	2.22045e-16	1.13822e-14
Cd9	2.22045e-16	1.13822e-14
Ube2s	2.22045e-16	1.13822e-14
Nptn	2.22045e-16	1.13822e-14
Selenom	2.22045e-16	1.13822e-14
Atp5h	2.22045e-16	1.13822e-14
Uqcrfs1	2.22045e-16	1.13822e-14
Hexb	2.22045e-16	1.13822e-14
Plec	2.22045e-16	1.13822e-14
Cyb5r3	2.22045e-16	1.13822e-14
Atp5a1	2.22045e-16	1.13822e-14
Sat1	2.22045e-16	1.13822e-14
mt-Co1	2.22045e-16	1.13822e-14
mt-Co2	2.22045e-16	1.13822e-14
mt-Co3	2.22045e-16	1.13822e-14
mt-Cytb	2.22045e-16	1.13822e-14
Mcl1	4.44089e-16	2.2532e-14
Atpif1	4.44089e-16	2.2532e-14
Plod3	4.44089e-16	2.2532e-14
Col6a1	4.44089e-16	2.2532e-14
Tnfrsf12a	4.44089e-16	2.2532e-14
Fgl2	5.55112e-16	2.78243e-14
Tmed3	5.55112e-16	2.78243e-14
Pxdn	5.55112e-16	2.78243e-14
Pfkp	5.55112e-16	2.78243e-14
Tmed9	5.55112e-16	2.78243e-14
Ppp1r14b	5.55112e-16	2.78243e-14
Tmem176b	6.66134e-16	3.31221e-14
Mvp	6.66134e-16	3.31221e-14
Cd81	6.66134e-16	3.31221e-14
Col8a1	6.66134e-16	3.31221e-14
Pcna	7.77156e-16	3.84885e-14
Asah1	7.77156e-16	3.84885e-14
Tmbim1	8.88178e-16	4.32121e-14
Atp5c1	8.88178e-16	4.32121e-14
Cd93	8.88178e-16	4.32121e-14
Ndufa13	8.88178e-16	4.32121e-14
Col18a1	8.88178e-16	4.32121e-14
Atox1	8.88178e-16	4.32121e-14
Rpl27	8.88178e-16	4.32121e-14
Nid1	8.88178e-16	4.32121e-14
H2-Ab1	8.88178e-16	4.32121e-14
Rap1b	1.11022e-15	5.38046e-14
Rpl3l	1.11022e-15	5.38046e-14
Srsf2	1.22125e-15	5.90699e-14
Eng	1.55431e-15	7.45993e-14
Ptgis	1.55431e-15	7.45993e-14
Cox6a1	1.55431e-15	7.45993e-14
Cnn2	1.55431e-15	7.45993e-14
Ran	1.77636e-15	8.50921e-14
Tnfrsf1a	2.66454e-15	1.27393e-13
Itgb5	3.10862e-15	1.48339e-13
Ikbkb	4.32987e-15	2.0622e-13
Taldo1	5.44009e-15	2.58601e-13
Uqcr11	9.88098e-15	4.68808e-13
Mrc2	1.08802e-14	5.15232e-13
Atp1b3	1.22125e-14	5.77223e-13
Fhl2	1.25455e-14	5.90719e-13
Ostf1	1.25455e-14	5.90719e-13
Ndufa1	1.27676e-14	6.00038e-13
Arhgdib	1.37668e-14	6.45776e-13
Rpl36	1.73195e-14	8.10898e-13
Psma5	1.90958e-14	8.92387e-13
Lrrc59	1.9873e-14	9.26963e-13
Ewsr1	1.9984e-14	9.30396e-13
Ppp1ca	2.02061e-14	9.38975e-13
Cltc	2.14273e-14	9.93868e-13
Arpc3	2.24265e-14	1.03828e-12
Camk1	2.42029e-14	1.11843e-12
Cndp2	2.57572e-14	1.18805e-12
Rbm39	2.81997e-14	1.2983e-12
Mtch1	3.0087e-14	1.38264e-12
Slc39a1	3.21965e-14	1.47685e-12
Vkorc1	3.28626e-14	1.50462e-12
Prdx4	3.55271e-14	1.62363e-12
Sfrp1	3.60822e-14	1.64598e-12
Ssr4	4.44089e-14	2.02211e-12
Ndufb8	5.4623e-14	2.48264e-12
Srsf3	5.89528e-14	2.67455e-12
Ywhab	5.92859e-14	2.68476e-12
Cox7b	6.81677e-14	3.08136e-12
Dad1	6.9722e-14	3.1459e-12
Copa	7.32747e-14	3.30021e-12
Bax	9.4369e-14	4.24258e-12
Stat1	1.108e-13	4.9723e-12
Plekho1	1.34337e-13	6.01768e-12
Aldoa	1.39111e-13	6.22032e-12
Kpnb1	1.41998e-13	6.33799e-12
Sdhb	1.57208e-13	7.00431e-12
Ssr2	1.68976e-13	7.51518e-12
Pi16	1.69642e-13	7.53133e-12
Lipa	1.73195e-13	7.67535e-12
Tspan4	1.79634e-13	7.94655e-12
Pnp	1.90181e-13	8.39818e-12
Rps27l	2.04059e-13	8.99503e-12
Rnase4	2.34257e-13	1.03079e-11
Cct5	2.46914e-13	1.08456e-11
Cebpd	2.51577e-13	1.1031e-11
Cltb	3.23075e-13	1.4141e-11
Serbp1	3.64819e-13	1.59401e-11
Ldha	3.747e-13	1.63431e-11
Selenof	3.76366e-13	1.6387e-11
Tubb4b	3.84581e-13	1.67155e-11
Ndufs6	4.16334e-13	1.8064e-11
Mydgf	4.32099e-13	1.87153e-11
Gask1b	5.55112e-13	2.39598e-11
Rpl36al	5.54667e-13	2.39598e-11
Calm2	5.86864e-13	2.52864e-11
Ap1s1	6.42153e-13	2.76208e-11
Odc1	6.43707e-13	2.76399e-11
Ndufa3	6.6569e-13	2.85345e-11
Rpl22l1	6.93556e-13	2.96778e-11
Anxa7	7.61835e-13	3.25435e-11
Glmp	7.77378e-13	3.31505e-11
Tgfbr2	8.04912e-13	3.42659e-11
Plxnb2	8.18012e-13	3.4764e-11
Ranbp1	8.20011e-13	3.47895e-11
AI506816	8.6009e-13	3.64277e-11
Hmgn1	8.85847e-13	3.74548e-11
Dlgap4	9.73444e-13	4.10886e-11
Mybpc3	9.93206e-13	4.18517e-11
Rac1	1.11533e-12	4.69183e-11
Spcs1	1.15241e-12	4.83963e-11
H3f3a	1.24711e-12	5.2285e-11
Qsox1	1.30651e-12	5.4683e-11
Fus	1.34226e-12	5.60849e-11
Dpysl3	1.37046e-12	5.71671e-11
Derl1	1.58229e-12	6.58928e-11
Pgd	1.7073e-12	7.09798e-11
Gm2a	1.72107e-12	7.14327e-11
Rpl10	1.76836e-12	7.32734e-11
Hnrnpa3	1.77214e-12	7.33076e-11
Bola2	1.80556e-12	7.4566e-11
Npdc1	2.07789e-12	8.56707e-11
Atp5l	2.11409e-12	8.70186e-11
Cavin1	2.357e-12	9.6857e-11
Tma7	2.59526e-12	1.06472e-10
Uqcrq	2.64144e-12	1.08188e-10
Mapre1	2.68952e-12	1.09976e-10
Aprt	3.26095e-12	1.33123e-10
Ndfip1	3.40017e-12	1.38579e-10
Stt3a	3.49454e-12	1.42192e-10
Vcp	3.66307e-12	1.48806e-10
Ssrp1	3.74911e-12	1.51971e-10
Csnk1a1	3.75322e-12	1.51971e-10
Hif1a	4.14779e-12	1.67675e-10
Tm9sf3	5.39879e-12	2.17892e-10
Pgk1	6.30407e-12	2.54016e-10
Gm47283	6.66034e-12	2.67938e-10
Egfl7	8.09863e-12	3.25272e-10
Mdh2	8.34122e-12	3.34475e-10
Ssr3	8.35831e-12	3.34621e-10
Cd47	8.89122e-12	3.55383e-10
Cxcl12	1.03498e-11	4.1302e-10
Itgav	1.0961e-11	4.36709e-10
Lamc1	1.09942e-11	4.37331e-10
Mtpn	1.14803e-11	4.55936e-10
Ilk	1.21012e-11	4.7983e-10
Jpt1	1.22985e-11	4.86876e-10
Grk2	1.29452e-11	5.11663e-10
Tcf25	1.33654e-11	5.27434e-10
Elovl1	1.58242e-11	6.23476e-10
Dab2	1.63529e-11	6.43286e-10
Hspa5	1.67117e-11	6.56363e-10
Actr2	1.71343e-11	6.71898e-10
Pink1	1.87097e-11	7.3252e-10
Gng5	1.91409e-11	7.47049e-10
Luc7l3	1.9124e-11	7.47049e-10
Etfb	1.97125e-11	7.6815e-10
Nisch	2.33555e-11	9.08689e-10
Tram1	2.48688e-11	9.66052e-10
Rrad	2.58256e-11	1.00165e-09
Ociad1	2.61862e-11	1.01406e-09
Ube2d3	2.71643e-11	1.0503e-09
Hnrnpf	2.73366e-11	1.05532e-09
Atp5e	2.94088e-11	1.13353e-09
Junb	2.94538e-11	1.13353e-09
Hsp90ab1	2.95293e-11	1.13468e-09
Rpl7a	3.0169e-11	1.15748e-09
Mlec	3.0806e-11	1.1801e-09
Zfp36l2	3.15268e-11	1.20585e-09
Hnrnpab	3.69382e-11	1.41066e-09
Srgn	4.22095e-11	1.60949e-09
Acsl1	4.44569e-11	1.69259e-09
Pcbp1	4.57545e-11	1.73933e-09
Ncl	4.86255e-11	1.84565e-09
Chpf	5.68181e-11	2.15332e-09
Dstn	5.71312e-11	2.16189e-09
Mical2	6.21808e-11	2.3494e-09
Rcan1	6.35454e-11	2.39731e-09
Sfpq	6.71241e-11	2.52849e-09
Cdk4	7.28451e-11	2.73984e-09
Lama4	7.66717e-11	2.87941e-09
Cd34	8.13859e-11	3.05184e-09
Cox8a	8.67209e-11	3.24699e-09
Macf1	8.86795e-11	3.31534e-09
Slc38a10	8.96013e-11	3.34477e-09
Mlf2	9.94783e-11	3.70791e-09
Pecam1	1.23977e-10	4.61415e-09
Ndufb5	1.27782e-10	4.74864e-09
Igfbp4	1.32126e-10	4.90274e-09
Ier5	1.33194e-10	4.935e-09
Gns	1.36701e-10	5.05741e-09
Fuca2	1.50247e-10	5.55032e-09
Itga7	1.63109e-10	6.01649e-09
Picalm	1.69808e-10	6.25434e-09
Copz1	1.77926e-10	6.54363e-09
Ehd2	1.78734e-10	6.56362e-09
Rhog	1.88637e-10	6.91708e-09
Hnrnpm	2.0605e-10	7.54448e-09
Ubc	2.1024e-10	7.68656e-09
Mfge8	2.10699e-10	7.69205e-09
P4ha1	2.34103e-10	8.53391e-09
Ctdsp2	2.4228e-10	8.81908e-09
Trir	2.46056e-10	8.94344e-09
Hint1	2.53047e-10	9.18411e-09
Psmb4	2.61451e-10	9.47529e-09
Rabggtb	2.68392e-10	9.71269e-09
Ergic3	3.31038e-10	1.19623e-08
Ier3	3.31878e-10	1.19753e-08
Meg3	3.52489e-10	1.27006e-08
Ogdh	3.57889e-10	1.28765e-08
Ogn	3.68866e-10	1.32522e-08
Iqgap1	3.99308e-10	1.43252e-08
Ywhaq	4.34393e-10	1.55614e-08
Rps27	4.36833e-10	1.56263e-08
Hnrnpa1	4.40671e-10	1.5741e-08
Ube2i	4.4197e-10	1.57647e-08
Gpi1	4.44086e-10	1.58175e-08
Ift20	4.52849e-10	1.61066e-08
Pon2	4.83078e-10	1.71572e-08
Creg1	5.44858e-10	1.93108e-08
Ndufb10	5.45269e-10	1.93108e-08
Prr13	5.67401e-10	2.0066e-08
Sdha	5.87518e-10	2.07479e-08
Srsf5	6.18654e-10	2.18165e-08
Nhp2	6.32746e-10	2.22818e-08
Snrpd1	6.40289e-10	2.25156e-08
Crtap	6.57274e-10	2.30802e-08
Stx5a	6.63172e-10	2.32544e-08
Gnas	7.61957e-10	2.66808e-08
Nucb1	7.6972e-10	2.69147e-08
Ckb	8.11137e-10	2.83231e-08
Axl	8.36616e-10	2.91718e-08
Osbpl9	8.49251e-10	2.95709e-08
Ube2z	9.474e-10	3.29423e-08
Mmp2	9.57831e-10	3.32584e-08
Pdgfrb	9.77946e-10	3.39095e-08
Aopep	9.80741e-10	3.39591e-08
Pkd1	1.00792e-09	3.48515e-08
Psmd4	1.01794e-09	3.51492e-08
Scn5a	1.03594e-09	3.57212e-08
Mxra8	1.04397e-09	3.59483e-08
Hspb7	1.05544e-09	3.62928e-08
Heg1	1.06137e-09	3.64462e-08
Uba1	1.13404e-09	3.88881e-08
Tmbim6	1.29932e-09	4.44946e-08
Tmed10	1.32886e-09	4.54436e-08
Csrp3	1.34831e-09	4.60453e-08
Lgals9	1.37978e-09	4.70554e-08
Timm13	1.44675e-09	4.92715e-08
Ndufab1	1.50476e-09	5.11772e-08
Myom2	1.574e-09	5.34589e-08
H2-Eb1	1.57905e-09	5.35571e-08
Gorasp2	1.59533e-09	5.40356e-08
S100a16	1.71684e-09	5.79932e-08
Pitpna	1.71594e-09	5.79932e-08
Mrpl52	1.72528e-09	5.81992e-08
Hist1h2bc	1.73573e-09	5.84726e-08
Snrnp70	1.96099e-09	6.59715e-08
Enah	2.18347e-09	7.33569e-08
Ddx17	2.2367e-09	7.50439e-08
Tnnt2	2.40264e-09	8.05027e-08
Atp6ap1	2.48616e-09	8.3189e-08
Plxnd1	2.51928e-09	8.41841e-08
Ecscr	2.59761e-09	8.66849e-08
Ctnnb1	2.63027e-09	8.76572e-08
Abhd12	2.71447e-09	9.03423e-08
Ndufc1	2.96862e-09	9.86686e-08
Atp6v0b	3.04889e-09	1.01201e-07
Parm1	3.25628e-09	1.07941e-07
Tmem167	3.38274e-09	1.11984e-07
Selenon	3.43887e-09	1.13691e-07
Csk	3.59944e-09	1.18841e-07
Cycs	3.61337e-09	1.19143e-07
Pcbp2	3.62385e-09	1.1933e-07
Flot1	3.8013e-09	1.25008e-07
Mapk3	3.91673e-09	1.28634e-07
Tial1	4.01154e-09	1.31573e-07
Tmem50a	4.04426e-09	1.32472e-07
Hnrnpl	4.32742e-09	1.4156e-07
Ddb1	4.59445e-09	1.50098e-07
Pcbp4	4.81241e-09	1.57012e-07
Rexo2	4.97586e-09	1.62132e-07
Spag9	5.02911e-09	1.63653e-07
Slc38a2	5.284e-09	1.71723e-07
Ap2s1	5.35406e-09	1.73772e-07
Lars2	5.44787e-09	1.76587e-07
Arpc1a	5.71929e-09	1.85143e-07
Eci1	7.7079e-09	2.49193e-07
Snx5	7.80016e-09	2.51848e-07
Tbrg1	8.84147e-09	2.85099e-07
Anxa6	9.41601e-09	3.03232e-07
Papola	9.90404e-09	3.18536e-07
Gars	1.26615e-08	4.06695e-07
Cavin3	1.26986e-08	4.0736e-07
Nap1l1	1.27483e-08	4.0843e-07
Actn2	1.34802e-08	4.3132e-07
Rab6a	1.35298e-08	4.32351e-07
Psmb1	1.50293e-08	4.79653e-07
Pam	1.50521e-08	4.79766e-07
Brk1	1.54148e-08	4.90695e-07
Prnp	1.75559e-08	5.58139e-07
Snx3	1.83006e-08	5.81071e-07
Psmd8	1.83864e-08	5.83053e-07
Cebpb	1.87201e-08	5.92122e-07
Ptprs	1.87112e-08	5.92122e-07
Ahnak	1.87495e-08	5.923e-07
Hnrnpu	1.92526e-08	6.07419e-07
Pdcd6	2.09028e-08	6.58647e-07
Manf	2.10982e-08	6.63964e-07
Myadm	2.34761e-08	7.37864e-07
Serinc3	2.4595e-08	7.72054e-07
Ssr1	2.49817e-08	7.83203e-07
Rtn3	2.53662e-08	7.94256e-07
Pomp	2.54493e-08	7.95857e-07
H2afj	2.61997e-08	8.18293e-07
Cers2	2.81931e-08	8.79448e-07
Mmp23	2.99375e-08	9.32692e-07
Arl6ip1	3.25039e-08	1.01012e-06
H2-Aa	3.24793e-08	1.01012e-06
Decr1	3.25545e-08	1.01043e-06
Eif4g2	3.2704e-08	1.0138e-06
Pltp	3.32634e-08	1.02986e-06
Ubxn1	3.4613e-08	1.07031e-06
Atp5k	3.5397e-08	1.09319e-06
Gapdh	3.9125e-08	1.20683e-06
Slc3a2	3.92706e-08	1.20982e-06
Dpt	3.94668e-08	1.21289e-06
Ehmt2	3.94679e-08	1.21289e-06
Nmrk2	4.13694e-08	1.26976e-06
Nes	4.27502e-08	1.31052e-06
Mpc2	4.38718e-08	1.34325e-06
Ptpra	4.41839e-08	1.35114e-06
Sec13	4.45618e-08	1.36102e-06
Sept7	4.50848e-08	1.3753e-06
Wls	4.53794e-08	1.38259e-06
Txndc17	4.86146e-08	1.47935e-06
Vamp8	4.9092e-08	1.49205e-06
Pfdn5	4.95091e-08	1.50289e-06
Cct3	4.98876e-08	1.51253e-06
Rtraf	5.1374e-08	1.5557e-06
Cops5	5.38453e-08	1.62657e-06
Strit1	5.38196e-08	1.62657e-06
Ndufb9	5.48403e-08	1.65462e-06
Psma3	5.736e-08	1.72855e-06
Nktr	5.84386e-08	1.75892e-06
Psmc4	5.90512e-08	1.77521e-06
Rbx1	6.00967e-08	1.80446e-06
Capzb	6.72288e-08	2.01617e-06
Sec24c	7.57603e-08	2.26929e-06
Copg1	7.60159e-08	2.2742e-06
Il6st	7.67248e-08	2.29265e-06
Dnajb11	8.29946e-08	2.47703e-06
Rer1	8.57861e-08	2.55727e-06
Cnih4	8.69593e-08	2.58914e-06
Tomm6	9.86336e-08	2.93322e-06
Trim28	1.03492e-07	3.07404e-06
Gas6	1.04811e-07	3.10949e-06
Tpi1	1.0551e-07	3.12651e-06
Zfas1	1.06658e-07	3.15299e-06
Sec11a	1.06643e-07	3.15299e-06
Tmem214	1.09144e-07	3.22266e-06
Ap2a2	1.11474e-07	3.28756e-06
Atp5f1	1.19485e-07	3.51924e-06
Rnf213	1.19613e-07	3.51924e-06
Lsm4	1.24155e-07	3.64855e-06
Dynlrb1	1.2492e-07	3.66669e-06
Clic4	1.43377e-07	4.20348e-06
Ces1d	1.45614e-07	4.26403e-06
Snd1	1.46762e-07	4.2926e-06
Tax1bp3	1.47767e-07	4.31693e-06
Nono	1.51919e-07	4.433e-06
Ccnd1	1.53239e-07	4.46627e-06
Arf1	1.53551e-07	4.47014e-06
Taf10	1.64153e-07	4.77319e-06
Nrbp1	1.79305e-07	5.20768e-06
Hjurp	1.85322e-07	5.37616e-06
Srp14	1.86613e-07	5.40731e-06
Jun	1.9135e-07	5.5381e-06
Actr1b	1.93398e-07	5.59088e-06
Trpc4ap	1.9829e-07	5.72564e-06
Cpd	2.10927e-07	6.08347e-06
Rab1a	2.12573e-07	6.12383e-06
Por	2.17515e-07	6.25896e-06
Eif3h	2.20289e-07	6.33146e-06
Ciao2b	2.22633e-07	6.38592e-06
Psmb5	2.22698e-07	6.38592e-06
Txnl1	2.36111e-07	6.76275e-06
Synpo	2.42048e-07	6.92482e-06
Srsf1	2.4589e-07	7.02663e-06
Gramd1a	2.47835e-07	7.07409e-06
Laptm4a	2.48564e-07	7.08677e-06
Uba52	2.5307e-07	7.20696e-06
Cfh	2.71572e-07	7.72501e-06
Acadvl	2.85661e-07	8.11652e-06
Etfdh	2.91842e-07	8.28267e-06
Tgfb1	3.44102e-07	9.75469e-06
Rbm25	3.58533e-07	1.01522e-05
Rab1b	3.92815e-07	1.11103e-05
Ogfr	3.96921e-07	1.12137e-05
Anapc2	4.01034e-07	1.1317e-05
Pmp22	4.69184e-07	1.32251e-05
Txnrd1	4.90897e-07	1.38215e-05
Hnrnph1	4.92738e-07	1.38577e-05
Emcn	5.07557e-07	1.42422e-05
Derl2	5.07447e-07	1.42422e-05
Tmem258	5.09005e-07	1.42667e-05
Slc25a3	5.20495e-07	1.45724e-05
Sri	5.29616e-07	1.4811e-05
Ldb3	5.42828e-07	1.51635e-05
Nedd4	5.51654e-07	1.53927e-05
Kdelr1	5.57219e-07	1.55306e-05
Son	5.92903e-07	1.65066e-05
Atp6v0a1	6.00678e-07	1.67044e-05
Ost4	6.05442e-07	1.68181e-05
Rnasek	6.26751e-07	1.73905e-05
Selenot	6.51937e-07	1.80692e-05
Srsf11	6.5975e-07	1.82654e-05
Clptm1l	6.89702e-07	1.90734e-05
Preb	7.08324e-07	1.95502e-05
Eif3b	7.08515e-07	1.95502e-05
Cct2	7.29919e-07	2.01185e-05
Ubtf	7.36634e-07	2.0281e-05
Psmb6	7.81591e-07	2.14808e-05
Srsf7	7.8194e-07	2.14808e-05
Acadl	7.8574e-07	2.15614e-05
Set	7.91806e-07	2.17039e-05
Psma6	8.02556e-07	2.19743e-05
Fkbp9	8.08657e-07	2.2117e-05
Txlnb	8.22018e-07	2.24578e-05
Arpp19	8.30363e-07	2.26608e-05
Itm2c	8.40966e-07	2.2925e-05
Atp5mpl	8.459e-07	2.30343e-05
Add1	9.35665e-07	2.54507e-05
Ptp4a2	9.45622e-07	2.56374e-05
Bnip2	9.44838e-07	2.56374e-05
Elob	9.44771e-07	2.56374e-05
Azin1	9.56541e-07	2.59052e-05
Nop10	9.87222e-07	2.6707e-05
Atxn10	1.01995e-06	2.75623e-05
Fbln1	1.02686e-06	2.7719e-05
Gng11	1.0874e-06	2.93214e-05
Ccnl2	1.19021e-06	3.20588e-05
Raly	1.22549e-06	3.29734e-05
Prkcsh	1.22845e-06	3.30173e-05
Stat3	1.32164e-06	3.54837e-05
Pdcd6ip	1.45154e-06	3.89291e-05
Cox7a2	1.48599e-06	3.98103e-05
Dst	1.50854e-06	4.03708e-05
Sulf2	1.51254e-06	4.04344e-05
Ankrd10	1.5177e-06	4.05286e-05
Chd4	1.53297e-06	4.08925e-05
Casq2	1.53645e-06	4.09414e-05
Tmed2	1.56e-06	4.15244e-05
9530068E07Rik	1.61037e-06	4.28193e-05
Dhx15	1.62067e-06	4.30473e-05
Ehbp1l1	1.6649e-06	4.41748e-05
Tra2a	1.72567e-06	4.57384e-05
Srsf6	1.72846e-06	4.57635e-05
Ehd4	1.88729e-06	4.99156e-05
Nedd8	1.90859e-06	5.04254e-05
Rps17	2.04183e-06	5.38883e-05
Dnpep	2.06089e-06	5.43338e-05
Mcrip1	2.07476e-06	5.46413e-05
Gmppa	2.08947e-06	5.49706e-05
Swi5	2.11372e-06	5.55497e-05
Vcl	2.24855e-06	5.90307e-05
Slc12a4	2.26632e-06	5.94346e-05
Phlda1	2.32001e-06	6.07786e-05
Naca	2.3696e-06	6.20122e-05
Hp1bp3	2.47006e-06	6.45733e-05
Caprin1	2.50622e-06	6.53812e-05
Eif3l	2.50417e-06	6.53812e-05
Sh3bgr	2.62071e-06	6.82963e-05
Map4k4	2.68696e-06	6.99493e-05
Hnrnph2	2.72942e-06	7.09804e-05
Eif3a	2.75001e-06	7.14412e-05
Phyh	2.85305e-06	7.40407e-05
Furin	2.8913e-06	7.4955e-05
Dgkz	2.97841e-06	7.71328e-05
Acaa1a	2.99993e-06	7.76093e-05
Arih1	3.12741e-06	8.08231e-05
Sdc2	3.24749e-06	8.38392e-05
Parva	3.36112e-06	8.66828e-05
Etfa	3.47425e-06	8.95075e-05
Luc7l2	3.50989e-06	9.03321e-05
Epn1	3.54045e-06	9.10244e-05
Hnrnpd	3.54433e-06	9.10302e-05
Man2b1	3.72692e-06	9.56209e-05
Mtdh	3.77305e-06	9.67045e-05
Snrpf	3.79119e-06	9.70695e-05
Gls	4.15448e-06	0.000106262
Tmem30a	4.20875e-06	0.000107539
Plod1	4.28942e-06	0.000109488
Cnbp	4.40932e-06	0.000112433
Rab11a	4.58196e-06	0.000116715
Hdgf	5.02106e-06	0.000127769
Psmc2	5.03218e-06	0.000127922
Selenos	5.05471e-06	0.000128363
Bclaf1	5.10563e-06	0.000129524
Atp5j2	5.13309e-06	0.000130088
H2afy	5.58792e-06	0.000141411
Bag6	5.59128e-06	0.000141411
Atp6v1c1	5.6001e-06	0.00014149
Tmpo	5.61582e-06	0.000141743
Sf3b1	5.85425e-06	0.000147612
Sumo2	5.87851e-06	0.000148073
Polr2a	5.90508e-06	0.000148592
Calm3	6.09767e-06	0.000153283
Eif4b	6.14871e-06	0.00015441
Lamb1	6.2657e-06	0.000157189
Cnih1	6.30231e-06	0.000157948
Commd3	6.43689e-06	0.000161158
Traf7	6.58374e-06	0.000164669
Ski	6.82178e-06	0.000170451
Dnm2	6.88831e-06	0.000171941
Atp6v1b2	6.95734e-06	0.00017349
Gstk1	7.09665e-06	0.000176787
Dync1i2	7.63712e-06	0.00019006
Sumo3	7.86135e-06	0.00019539
Dusp3	7.86701e-06	0.00019539
Gm15543	8.41855e-06	0.000208463
Lrrc58	8.41336e-06	0.000208463
AC149090.1	8.41738e-06	0.000208463
Cav1	8.82338e-06	0.00021827
Pakap-1	9.00018e-06	0.000222423
Tnks2	9.0222e-06	0.000222746
Rarres2	9.40012e-06	0.000231846
Vasp	9.52349e-06	0.000234656
Trim47	9.81055e-06	0.000241489
Pofut2	9.96762e-06	0.000245113
Esam	1.01686e-05	0.000249809
Tpd52l2	1.05433e-05	0.000258757
Tm4sf1	1.05803e-05	0.00025941
Xist	1.07357e-05	0.000262962
Ptprn	1.08122e-05	0.000264574
Hadh	1.13258e-05	0.000276339
C1d	1.13264e-05	0.000276339
Glud1	1.1319e-05	0.000276339
Fkbp8	1.13745e-05	0.000277241
Lama5	1.13877e-05	0.000277292
Mrpl42	1.14824e-05	0.000279325
Ly6c1	1.16165e-05	0.000282309
Chchd2	1.24591e-05	0.000302492
Slc6a8	1.25589e-05	0.000304616
Scamp2	1.28237e-05	0.000310736
Csnk1d	1.31558e-05	0.000318473
Gdi1	1.33415e-05	0.000322655
Rab2a	1.34162e-05	0.000324145
Selenok	1.40633e-05	0.00033945
Sod2	1.46218e-05	0.000352589
Tnfaip1	1.5116e-05	0.000364152
Podxl	1.55178e-05	0.00037347
Plpp1	1.64085e-05	0.000394525
H13	1.64427e-05	0.000394966
Emc10	1.65004e-05	0.000395969
Fnbp1	1.67462e-05	0.00040148
Maged2	1.70221e-05	0.000407702
Hnrnpdl	1.70548e-05	0.000408092
Psmc1	1.87092e-05	0.000447248
Itpripl2	1.89401e-05	0.000452333
Trf	1.8971e-05	0.000452636
BC031181	1.97116e-05	0.000469854
Scarb2	2.02535e-05	0.00048203
Rpl7l1	2.02612e-05	0.00048203
Eif6	2.05382e-05	0.000488154
Srrt	2.09544e-05	0.00049757
Hnrnpc	2.09858e-05	0.00049784
Pfkm	2.13702e-05	0.000506476
Snhg1	2.16146e-05	0.000511782
Rad23b	2.16897e-05	0.000513071
Sf3b3	2.20237e-05	0.000520475
Atp1a1	2.20867e-05	0.000521469
Xpo1	2.25744e-05	0.000532478
Dnajb6	2.29329e-05	0.000540422
Stk25	2.36414e-05	0.000556589
Rbbp4	2.37913e-05	0.000559589
Rhoa	2.38384e-05	0.000560167
Cnpy2	2.42017e-05	0.000568168
Crip2	2.55003e-05	0.000598088
Rbbp7	2.55378e-05	0.000598404
Bzw1	2.55814e-05	0.000598861
Cyb5a	2.71418e-05	0.000634792
Rnf130	2.73906e-05	0.000640009
Med21	2.76934e-05	0.000646476
Eif1	2.86094e-05	0.000667233
Nfkbia	2.89413e-05	0.000674341
Aldh2	3.27472e-05	0.000762305
Copb2	3.31989e-05	0.000772098
Mcfd2	3.32801e-05	0.000773263
Trip12	3.41393e-05	0.000792485
Ddx39b	3.4176e-05	0.000792597
Ndufb1-ps	3.45e-05	0.000799366
Ube2v1	3.57533e-05	0.000827633
Cd36	3.61785e-05	0.000836698
Eif3f	3.63458e-05	0.000839785
Jund	3.68692e-05	0.000851087
Tmem9b	3.69865e-05	0.000853004
Syf2	3.82697e-05	0.00088178
Rhoq	3.85206e-05	0.000886738
Sparcl1	3.86131e-05	0.000888045
Sec31a	3.93589e-05	0.000904361
Snrpe	4.14096e-05	0.000950602
Atp6v1f	4.22899e-05	0.000969914
Supt5	4.43756e-05	0.00101681
Pls3	4.45277e-05	0.00101936
Sdf4	4.46314e-05	0.00102079
Ndufs3	4.51724e-05	0.00103222
Cct8	4.87557e-05	0.00111307
Slc39a13	5.05958e-05	0.00115321
Dazap1	5.06064e-05	0.00115321
Dcun1d5	5.0881e-05	0.0011584
Flii	5.19016e-05	0.00118056
Myo1c	5.24111e-05	0.00119106
Ccdc141	5.7477e-05	0.00130499
Sf3b5	6.03927e-05	0.00136994
Cdipt	6.18281e-05	0.00140122
Eef1d	6.29718e-05	0.00142495
Ddx3x	6.29898e-05	0.00142495
Atp5md	6.36467e-05	0.0014385
Xbp1	6.39422e-05	0.00144387
Sf1	6.42931e-05	0.00145047
Cdk2ap2	6.46486e-05	0.00145717
Psmc6	6.62742e-05	0.00149246
Emc7	6.87995e-05	0.00154792
Cr1l	6.89586e-05	0.0015501
Ppp2r1a	6.9223e-05	0.00155464
Rab11fip5	6.97573e-05	0.00156522
Ifnar2	7.1058e-05	0.00159297
Timm10b	7.37829e-05	0.00165257
Leng8	7.93296e-05	0.0017752
Tspan9	7.96559e-05	0.0017809
Cd151	8.08044e-05	0.00180495
Ndufv1	8.25453e-05	0.00184219
Tnpo1	8.35616e-05	0.00186319
Nmt1	8.85214e-05	0.00197025
Tbca	8.84916e-05	0.00197025
Zfp207	8.94416e-05	0.00198895
Kidins220	8.9787e-05	0.00199485
Slc50a1	9.08508e-05	0.00201591
Tmem208	9.08974e-05	0.00201591
Fads3	9.16251e-05	0.00203024
Cdk11b	9.2246e-05	0.00204218
Ttll1	9.75776e-05	0.00215829
Rras	0.000100556	0.0022222
Vwa5a	0.000101335	0.00223742
Dbnl	0.000103037	0.00227298
Lrg1	0.000104216	0.00229694
Chchd3	0.000107904	0.00237614
Cwc15	0.000109377	0.00240644
Mprip	0.000112701	0.00247738
Ppp2ca	0.000113892	0.00250135
Sh3glb1	0.000119785	0.00262843
Tuba8	0.00012025	0.002634
Mcts1	0.000120218	0.002634
Lman1	0.000121872	0.00266718
Ifrd1	0.000123102	0.00269173
Atp6v0d1	0.000123942	0.0027077
Ccnd3	0.00013304	0.00290392
Wnk1	0.000134507	0.00293337
Top2b	0.000135766	0.00295822
Txnl4a	0.000138683	0.00301914
Lrp10	0.0001389	0.00302122
Ext2	0.000142023	0.00308432
Ndufv2	0.000142049	0.00308432
Tardbp	0.000142488	0.00309115
Ik	0.000147443	0.00319584
Tmem259	0.000148888	0.00322436
Akt1s1	0.000153861	0.00332916
Nsa2	0.000157093	0.00339613
Znhit1	0.000164019	0.00354278
Sidt2	0.000164428	0.00354854
1810058I24Rik	0.000164597	0.00354911
Cct7	0.000164852	0.00355152
Szrd1	0.000165785	0.00356854
Fxyd1	0.000166822	0.00358775
Hist1h1c	0.000168051	0.00361105
Uqcr10	0.000168823	0.0036245
Ppp1r2	0.000169396	0.00363368
Jak1	0.000172745	0.00370232
Nomo1	0.000175233	0.00375036
Icam2	0.000175288	0.00375036
Mrpl17	0.000176923	0.00378207
Spcs2	0.000182534	0.00389867
Sar1a	0.000182799	0.00390099
Rela	0.000186819	0.00398334
Rpl9-ps6	0.000190433	0.00405692
Hhatl	0.00019375	0.00412407
Hnrnpa0	0.000200985	0.0042744
Atp9a	0.000214365	0.00455507
Clip4	0.000217378	0.00461514
Bud31	0.000219573	0.00465777
Park7	0.000221569	0.0046961
Trmt112	0.000228595	0.00484089
Adamts1	0.000236502	0.00500406
Smoc2	0.000239105	0.00505485
Pdlim1	0.000242068	0.00511314
Tbx20	0.000242609	0.0051202
Cox5b	0.000251009	0.00529299
Cic	0.000257781	0.00543118
Mtfp1	0.000268868	0.00565998
Psma1	0.000272093	0.00572302
Canx	0.000278427	0.00585131
Pdlim5	0.000280955	0.00589944
Hypk	0.000287766	0.00603228
Phf5a	0.000287721	0.00603228
Psmb2	0.000288562	0.00604385
Mrps18c	0.000291282	0.0060957
Arf5	0.000292313	0.00611213
Sra1	0.000293204	0.0061256
Glul	0.000293973	0.00613651
Asb2	0.0003108	0.00648232
Tomm7	0.000312326	0.0065087
Trim25	0.000316121	0.00658227
Sept9	0.000319617	0.00664948
Hspa4	0.000324739	0.0067504
Mien1	0.00032561	0.00676286
Ninj1	0.000327518	0.00679681
Fgfr1op2	0.000331468	0.00687304
Cast	0.000334879	0.00693798
Impdh2	0.000336324	0.00696211
Ehd1	0.000345832	0.00715298
Rabl6	0.000346316	0.00715703
Naa50	0.000349635	0.00721963
Klhl41	0.000351463	0.00725136
Rnps1	0.000351821	0.00725271
Vamp3	0.000352334	0.00725728
Erp44	0.00035345	0.00727423
Arhgef7	0.000356282	0.00732644
Pgam2	0.000360265	0.00740223
Ddx1	0.000365433	0.00750221
Midn	0.000367952	0.0075477
Ifi27	0.000369845	0.00758028
Rnf181	0.000372541	0.00762925
Smarca4	0.000376296	0.00769979
Cuedc2	0.000386319	0.0078984
B4galt1	0.000401421	0.00819812
5430431A17Rik	0.000401639	0.00819812
Oxct1	0.000423071	0.0086285
Hmgb1	0.00044895	0.0091488
Uqcrh	0.000451269	0.00918854
Cct6a	0.000454735	0.00925152
Fam120a	0.000456206	0.00927387
Naa38	0.00045906	0.00932425
1810013L24Rik	0.000461296	0.00936202
Mtus1	0.000462462	0.00937803
Prrc2a	0.000465122	0.00942429
Srrm2	0.000466531	0.00944515
Cox17	0.000467805	0.00946322
Sars	0.000479483	0.00969157
Fcgrt	0.000486763	0.00983073
Araf	0.000491179	0.00991186
Palld	0.000494175	0.00996424
Mgst3	0.00049665	0.010006
Usp47	0.00049793	0.0100237
Usp9x	0.000504051	0.0101387
Cisd2	0.000507036	0.0101905
Snhg9	0.000524024	0.0105234
Khdrbs1	0.000526521	0.010565
Tor1aip2	0.000538908	0.0108049
Galnt1	0.000545082	0.0109198
Alpk3	0.000545527	0.01092
Eif2s3x	0.000548719	0.010975
Ndrg4	0.000552663	0.011045
Polr1d	0.000561692	0.0112164
Os9	0.000567025	0.0113138
Fis1	0.000571243	0.0113889
Tex264	0.00058334	0.0116207
Lamtor3	0.000584537	0.0116352
Tmem14c	0.000606998	0.0120727
Rheb	0.000609706	0.0121168
Rps27rt	0.000624629	0.0124035
Wdr26	0.000626346	0.0124277
Napa	0.000634916	0.0125877
Uggt1	0.000639821	0.0126748
Ppm1g	0.000646583	0.0127985
Pygb	0.000683835	0.0135252
Mrfap1	0.000687173	0.0135804
Yipf3	0.000709878	0.0140179
Adprh	0.000717274	0.0141528
Stx7	0.000731994	0.0144317
Htra3	0.000743886	0.0146546
Psmd6	0.00075518	0.0148653
Cdh5	0.000766586	0.0150779
Serhl	0.000783554	0.0153994
Srprb	0.000793384	0.0155803
Eif4a3	0.000825146	0.0161913
Slc44a2	0.000826482	0.0162047
Psmd13	0.000831294	0.0162862
Snrpc	0.000859659	0.0168286
Tpp1	0.000865467	0.016929
Sucla2	0.000877528	0.0171514
Slc6a6	0.000898197	0.0175416
Ndufb11	0.000899063	0.0175447
Rbck1	0.000918341	0.0179069
Ndufa2	0.000943094	0.0183751
Mcrs1	0.00096438	0.0187751
Psma2	0.000968393	0.0188385
Slk	0.000976865	0.0189885
Mbd3	0.000981599	0.0190656
Etf1	0.000989082	0.0191959
Micos10	0.000999414	0.0193813
Eif3k	0.00101295	0.0196284
Arl8b	0.00102437	0.0198343
Nckap1	0.00102601	0.0198507
Dazap2	0.00102895	0.0198921
M6pr	0.00103114	0.0199189
Vegfb	0.00104094	0.0200926
Zmiz1	0.00104489	0.0201531
Hspb2	0.00105313	0.0202964
Zmat2	0.00106598	0.0205281
Asb8	0.00108549	0.0208876
Oaz1	0.00109764	0.0211051
Mbd2	0.00110058	0.0211452
Dpysl2	0.00110873	0.0212854
Map2k3	0.00112591	0.0215985
Dctn2	0.0011498	0.0220399
Bhlhe40	0.00118122	0.0226246
Tra2b	0.00118913	0.0227586
Xdh	0.00119337	0.0228222
Atad3a	0.00119592	0.0228534
Eif4e2	0.00120284	0.022968
Mrpl33	0.00120554	0.023002
Jup	0.00122995	0.0234496
Tfg	0.00123568	0.0235409
Ndufv3	0.0012413	0.0236298
Eif3c	0.00125575	0.0238865
D8Ertd738e	0.00130911	0.0248825
Psmd3	0.00131365	0.0249497
Tmem123	0.00131695	0.0249933
Ppp1r12c	0.00132986	0.0252191
Ephx2	0.00133358	0.0252703
Larp1	0.00137329	0.0260029
Ppp6r1	0.00138394	0.0261848
Nr2f6	0.00139803	0.0264312
Ppp2r5c	0.00139984	0.0264453
Gm44386	0.00140194	0.0264648
Kif5b	0.00141068	0.0266097
Lama2	0.00142171	0.0267974
Rex1bd	0.00142301	0.0268015
Snapin	0.00142849	0.0268844
Tom1	0.0014317	0.0269245
Reep5	0.00145424	0.0273277
Slc25a11	0.00145841	0.0273854
Nipsnap2	0.00150157	0.0281745
Sspn	0.00150427	0.0282038
Ramp2	0.00156981	0.0294105
Cyc1	0.00157391	0.029465
Psmc3	0.00158029	0.0295525
Akap13	0.00158095	0.0295525
Eif3i	0.00161479	0.0301623
Bcap31	0.0016504	0.0308043
Smpd1	0.00166455	0.0310218
Gtf2h5	0.00166389	0.0310218
Ktn1	0.00167712	0.0312326
Slc25a39	0.0016808	0.0312778
Myoz2	0.00170924	0.0317831
Oaz2	0.0017144	0.0318315
Sdf2	0.00171313	0.0318315
Morf4l1	0.00173506	0.0321911
Snrpb	0.00174036	0.0322653
Ank1	0.00174803	0.0323833
Kansl2	0.00177509	0.0328602
Hprt	0.00177918	0.0329115
Dnajc5	0.001781	0.0329205
Riok3	0.00183548	0.0339024
Slc2a4	0.00185656	0.0342664
Cygb	0.00187642	0.0346073
Uqcrc1	0.00189989	0.0350141
Man2a2	0.00191482	0.0352631
Gspt1	0.00192527	0.0354294
Copz2	0.00193748	0.0356275
Sympk	0.00195254	0.035878
Pgls	0.00197339	0.0362343
Hacd1	0.00201559	0.0369819
Ripor1	0.0020281	0.037184
Abcf1	0.00205164	0.0375878
Fh1	0.00205518	0.0375998
Synpo2l	0.00205531	0.0375998
Kcnip2	0.0020736	0.0379064
Klf2	0.00208828	0.0381468
Ufc1	0.00216486	0.0395166
Entpd5	0.00222575	0.0405981
Degs1	0.00227458	0.0414584
Timm10	0.00229031	0.0417146
Cope	0.00230384	0.0418995
Lrrc10	0.0023034	0.0418995
Ppp6r3	0.00231216	0.0420201
S100a13	0.00231851	0.0421048
Dnaja1	0.00234354	0.0425284
Psmd7	0.00237472	0.0430627
Stip1	0.00238668	0.0432481
Pygm	0.00252626	0.045744
Perm1	0.002543	0.0460135
Tomm20	0.00256961	0.0464613
Ndufs2	0.00259182	0.0468287
Emilin2	0.00260134	0.0469667
Ahcyl1	0.00261052	0.047064
Ptpn11	0.00260943	0.047064
Cbr2	0.00261294	0.0470735
Sppl3	0.00263711	0.0474746
Pcyt1a	0.00264034	0.0474983
Psma7	0.00266471	0.0479021
Naxd	0.00266955	0.0479543
Rab22a	0.00267704	0.0480542
Kctd10	0.00275484	0.049415
Tmem201	0.00276172	0.0494671
Cmya5	0.0027598	0.0494671

## Sheet: B
gene	combined_pvalue	adjusted_pvalue
Sulf1	5.55e-17	3.47521e-15
Rpl7	5.55e-17	3.47521e-15
Ptpn18	5.55e-17	3.47521e-15
Ankrd23	5.55e-17	3.47521e-15
Cox5b	5.55e-17	3.47521e-15
Rpl31	5.55e-17	3.47521e-15
Fhl2	5.55e-17	3.47521e-15
Col3a1	5.55e-17	3.47521e-15
Col5a2	5.55e-17	3.47521e-15
Stat1	5.55e-17	3.47521e-15
Eef1b2	5.55e-17	3.47521e-15
Acadl	5.55e-17	3.47521e-15
Fn1	5.55e-17	3.47521e-15
Rpl37a	5.55e-17	3.47521e-15
Arpc2	5.55e-17	3.47521e-15
Tmbim1	5.55e-17	3.47521e-15
Des	5.55e-17	3.47521e-15
Chpf	5.55e-17	3.47521e-15
Serpine2	5.55e-17	3.47521e-15
Ncl	5.55e-17	3.47521e-15
Ptma	5.55e-17	3.47521e-15
Hjurp	5.55e-17	3.47521e-15
Col6a3	5.55e-17	3.47521e-15
Actr3	5.55e-17	3.47521e-15
Csrp1	5.55e-17	3.47521e-15
Phlda3	5.55e-17	3.47521e-15
Prg4	5.55e-17	3.47521e-15
Arpc5	5.55e-17	3.47521e-15
Lamc1	5.55e-17	3.47521e-15
Qsox1	5.55e-17	3.47521e-15
Gas5	5.55e-17	3.47521e-15
Atp1b1	5.55e-17	3.47521e-15
Mpc2	5.55e-17	3.47521e-15
Uck2	5.55e-17	3.47521e-15
Fcgr2b	5.55e-17	3.47521e-15
Fcgr3	5.55e-17	3.47521e-15
Fcer1g	5.55e-17	3.47521e-15
Pea15a	5.55e-17	3.47521e-15
Tagln2	5.55e-17	3.47521e-15
Hnrnpu	5.55e-17	3.47521e-15
Capn2	5.55e-17	3.47521e-15
Atp5c1	5.55e-17	3.47521e-15
Vim	5.55e-17	3.47521e-15
Mrc1	5.55e-17	3.47521e-15
Npdc1	5.55e-17	3.47521e-15
Egfl7	5.55e-17	3.47521e-15
Rpl7a	5.55e-17	3.47521e-15
Surf4	5.55e-17	3.47521e-15
Col5a1	5.55e-17	3.47521e-15
Fam129b	5.55e-17	3.47521e-15
Rpl12	5.55e-17	3.47521e-15
Hspa5	5.55e-17	3.47521e-15
Gsn	5.55e-17	3.47521e-15
Rpl35	5.55e-17	3.47521e-15
Xirp2	5.55e-17	3.47521e-15
Atp5g3	5.55e-17	3.47521e-15
Hnrnpa3	5.55e-17	3.47521e-15
Ttn	5.55e-17	3.47521e-15
Itgav	5.55e-17	3.47521e-15
Spi1	5.55e-17	3.47521e-15
Cd44	5.55e-17	3.47521e-15
Rcn1	5.55e-17	3.47521e-15
Actc1	5.55e-17	3.47521e-15
Thbs1	5.55e-17	3.47521e-15
Pdia3	5.55e-17	3.47521e-15
Serf2	5.55e-17	3.47521e-15
B2m	5.55e-17	3.47521e-15
AA467197	5.55e-17	3.47521e-15
Fbn1	5.55e-17	3.47521e-15
Sirpa	5.55e-17	3.47521e-15
Rrbp1	5.55e-17	3.47521e-15
Cd93	5.55e-17	3.47521e-15
Cst3	5.55e-17	3.47521e-15
Fkbp1a	5.55e-17	3.47521e-15
Myl9	5.55e-17	3.47521e-15
Rpn2	5.55e-17	3.47521e-15
Tgm2	5.55e-17	3.47521e-15
Ube2c	5.55e-17	3.47521e-15
Ctsa	5.55e-17	3.47521e-15
B4galt5	5.55e-17	3.47521e-15
Pmepa1	5.55e-17	3.47521e-15
Ctsz	5.55e-17	3.47521e-15
Atp5e	5.55e-17	3.47521e-15
Rps21	5.55e-17	3.47521e-15
Tpd52	5.55e-17	3.47521e-15
Fabp5	5.55e-17	3.47521e-15
Rpl22l1	5.55e-17	3.47521e-15
Ndufb5	5.55e-17	3.47521e-15
Anxa5	5.55e-17	3.47521e-15
Ndufc1	5.55e-17	3.47521e-15
Postn	5.55e-17	3.47521e-15
Serp1	5.55e-17	3.47521e-15
Strit1	5.55e-17	3.47521e-15
Ssr3	5.55e-17	3.47521e-15
Mfsd1	5.55e-17	3.47521e-15
Etfdh	5.55e-17	3.47521e-15
Sfrp2	5.55e-17	3.47521e-15
Rps3a1	5.55e-17	3.47521e-15
Fcrls	5.55e-17	3.47521e-15
Lmna	5.55e-17	3.47521e-15
Ssr2	5.55e-17	3.47521e-15
Krtcap2	5.55e-17	3.47521e-15
Adam15	5.55e-17	3.47521e-15
Tpm3	5.55e-17	3.47521e-15
Slc39a1	5.55e-17	3.47521e-15
S100a4	5.55e-17	3.47521e-15
S100a6	5.55e-17	3.47521e-15
Sprr1a	5.55e-17	3.47521e-15
S100a11	5.55e-17	3.47521e-15
S100a10	5.55e-17	3.47521e-15
Ctss	5.55e-17	3.47521e-15
Mcl1	5.55e-17	3.47521e-15
Ecm1	5.55e-17	3.47521e-15
Fcgr1	5.55e-17	3.47521e-15
Olfml3	5.55e-17	3.47521e-15
Rhoc	5.55e-17	3.47521e-15
Capza1	5.55e-17	3.47521e-15
Atp5f1	5.55e-17	3.47521e-15
Cd53	5.55e-17	3.47521e-15
Cnn3	5.55e-17	3.47521e-15
Rpl34	5.55e-17	3.47521e-15
Hadh	5.55e-17	3.47521e-15
H2afz	5.55e-17	3.47521e-15
Selenof	5.55e-17	3.47521e-15
Ccn1	5.55e-17	3.47521e-15
Acadm	5.55e-17	3.47521e-15
Rps20	5.55e-17	3.47521e-15
Sdcbp	5.55e-17	3.47521e-15
Decr1	5.55e-17	3.47521e-15
B4galt1	5.55e-17	3.47521e-15
Tpm2	5.55e-17	3.47521e-15
Tln1	5.55e-17	3.47521e-15
Clta	5.55e-17	3.47521e-15
Col15a1	5.55e-17	3.47521e-15
Sec61b	5.55e-17	3.47521e-15
Txn1	5.55e-17	3.47521e-15
Tnc	5.55e-17	3.47521e-15
Plin2	5.55e-17	3.47521e-15
Rps6	5.55e-17	3.47521e-15
Gpx7	5.55e-17	3.47521e-15
Uqcrh	5.55e-17	3.47521e-15
Akr1a1	5.55e-17	3.47521e-15
Prdx1	5.55e-17	3.47521e-15
Rps8	5.55e-17	3.47521e-15
P3h1	5.55e-17	3.47521e-15
Col16a1	5.55e-17	3.47521e-15
Fabp3	5.55e-17	3.47521e-15
Sdc3	5.55e-17	3.47521e-15
Laptm5	5.55e-17	3.47521e-15
Atpif1	5.55e-17	3.47521e-15
Cd52	5.55e-17	3.47521e-15
Sh3bgrl3	5.55e-17	3.47521e-15
Stmn1	5.55e-17	3.47521e-15
Rsrp1	5.55e-17	3.47521e-15
Rpl11	5.55e-17	3.47521e-15
Id3	5.55e-17	3.47521e-15
C1qb	5.55e-17	3.47521e-15
C1qc	5.55e-17	3.47521e-15
C1qa	5.55e-17	3.47521e-15
Cdc42	5.55e-17	3.47521e-15
Hspg2	5.55e-17	3.47521e-15
Ddost	5.55e-17	3.47521e-15
Pink1	5.55e-17	3.47521e-15
Sdhb	5.55e-17	3.47521e-15
Hspb7	5.55e-17	3.47521e-15
Efhd2	5.55e-17	3.47521e-15
Nppb	5.55e-17	3.47521e-15
Nppa	5.55e-17	3.47521e-15
Pgd	5.55e-17	3.47521e-15
Rpl22	5.55e-17	3.47521e-15
Gnb1	5.55e-17	3.47521e-15
Mmp23	5.55e-17	3.47521e-15
Isg15	5.55e-17	3.47521e-15
Fgl2	5.55e-17	3.47521e-15
AI506816	5.55e-17	3.47521e-15
Chpf2	5.55e-17	3.47521e-15
Hadha	5.55e-17	3.47521e-15
Hadhb	5.55e-17	3.47521e-15
Ost4	5.55e-17	3.47521e-15
Emilin1	5.55e-17	3.47521e-15
Ywhah	5.55e-17	3.47521e-15
Wdr1	5.55e-17	3.47521e-15
Sod3	5.55e-17	3.47521e-15
Rpl9	5.55e-17	3.47521e-15
Uchl1	5.55e-17	3.47521e-15
Hopx	5.55e-17	3.47521e-15
Igfbp7	5.55e-17	3.47521e-15
Pf4	5.55e-17	3.47521e-15
Sept11	5.55e-17	3.47521e-15
Anxa3	5.55e-17	3.47521e-15
Spp1	5.55e-17	3.47521e-15
Rpl5	5.55e-17	3.47521e-15
Atp5k	5.55e-17	3.47521e-15
Gak	5.55e-17	3.47521e-15
Oasl2	5.55e-17	3.47521e-15
Mlec	5.55e-17	3.47521e-15
Dynll1	5.55e-17	3.47521e-15
Cox6a1	5.55e-17	3.47521e-15
Rplp0	5.55e-17	3.47521e-15
Rpl6	5.55e-17	3.47521e-15
Erp29	5.55e-17	3.47521e-15
Myl2	5.55e-17	3.47521e-15
Arpc3	5.55e-17	3.47521e-15
Atp2a2	5.55e-17	3.47521e-15
Ran	5.55e-17	3.47521e-15
Gusb	5.55e-17	3.47521e-15
Mdh2	5.55e-17	3.47521e-15
Hspb1	5.55e-17	3.47521e-15
Plod3	5.55e-17	3.47521e-15
Ap1s1	5.55e-17	3.47521e-15
Serpine1	5.55e-17	3.47521e-15
Gnb2	5.55e-17	3.47521e-15
Pcolce	5.55e-17	3.47521e-15
Eif3b	5.55e-17	3.47521e-15
Actb	5.55e-17	3.47521e-15
Fscn1	5.55e-17	3.47521e-15
Kdelr2	5.55e-17	3.47521e-15
Arpc1b	5.55e-17	3.47521e-15
Atp5j2	5.55e-17	3.47521e-15
Rpl21	5.55e-17	3.47521e-15
Alox5ap	5.55e-17	3.47521e-15
Col1a2	5.55e-17	3.47521e-15
Ndufa4	5.55e-17	3.47521e-15
Ndufa5	5.55e-17	3.47521e-15
Calu	5.55e-17	3.47521e-15
Flnc	5.55e-17	3.47521e-15
Cald1	5.55e-17	3.47521e-15
Mtpn	5.55e-17	3.47521e-15
Zyx	5.55e-17	3.47521e-15
Tmem176b	5.55e-17	3.47521e-15
Tmem176a	5.55e-17	3.47521e-15
Gpnmb	5.55e-17	3.47521e-15
Cycs	5.55e-17	3.47521e-15
Hnrnpa2b1	5.55e-17	3.47521e-15
Fkbp9	5.55e-17	3.47521e-15
Capg	5.55e-17	3.47521e-15
Tmsb10	5.55e-17	3.47521e-15
Loxl3	5.55e-17	3.47521e-15
Snrpg	5.55e-17	3.47521e-15
Pcbp1	5.55e-17	3.47521e-15
Anxa4	5.55e-17	3.47521e-15
Copg1	5.55e-17	3.47521e-15
Rpn1	5.55e-17	3.47521e-15
Sec61a1	5.55e-17	3.47521e-15
Fbln2	5.55e-17	3.47521e-15
Edem1	5.55e-17	3.47521e-15
Camk1	5.55e-17	3.47521e-15
Arpc4	5.55e-17	3.47521e-15
Rpl32	5.55e-17	3.47521e-15
Plxnd1	5.55e-17	3.47521e-15
Cxcl12	5.55e-17	3.47521e-15
Hnrnpf	5.55e-17	3.47521e-15
Mfap5	5.55e-17	3.47521e-15
C3ar1	5.55e-17	3.47521e-15
Clec4n	5.55e-17	3.47521e-15
Ptms	5.55e-17	3.47521e-15
Mlf2	5.55e-17	3.47521e-15
Gapdh	5.55e-17	3.47521e-15
Tnfrsf1a	5.55e-17	3.47521e-15
Emp1	5.55e-17	3.47521e-15
Mgp	5.55e-17	3.47521e-15
Arhgdib	5.55e-17	3.47521e-15
Ldhb	5.55e-17	3.47521e-15
Ndufa3	5.55e-17	3.47521e-15
Rps9	5.55e-17	3.47521e-15
Pirb	5.55e-17	3.47521e-15
Tnni3	5.55e-17	3.47521e-15
Rpl28	5.55e-17	3.47521e-15
Ube2s	5.55e-17	3.47521e-15
Rps5	5.55e-17	3.47521e-15
Selenow	5.55e-17	3.47521e-15
C5ar1	5.55e-17	3.47521e-15
Vasp	5.55e-17	3.47521e-15
Ckm	5.55e-17	3.47521e-15
Apoe	5.55e-17	3.47521e-15
Rps19	5.55e-17	3.47521e-15
Tgfb1	5.55e-17	3.47521e-15
Rps16	5.55e-17	3.47521e-15
Ech1	5.55e-17	3.47521e-15
Actn4	5.55e-17	3.47521e-15
Cox7a1	5.55e-17	3.47521e-15
Tyrobp	5.55e-17	3.47521e-15
Fxyd5	5.55e-17	3.47521e-15
Gramd1a	5.55e-17	3.47521e-15
Etfb	5.55e-17	3.47521e-15
Rcn3	5.55e-17	3.47521e-15
Rps11	5.55e-17	3.47521e-15
Rpl13a	5.55e-17	3.47521e-15
Hrc	5.55e-17	3.47521e-15
Ftl1	5.55e-17	3.47521e-15
Rpl18	5.55e-17	3.47521e-15
Emp3	5.55e-17	3.47521e-15
Csrp3	5.55e-17	3.47521e-15
Mfge8	5.55e-17	3.47521e-15
Idh2	5.55e-17	3.47521e-15
Iqgap1	5.55e-17	3.47521e-15
Ctsc	5.55e-17	3.47521e-15
Prss23	5.55e-17	3.47521e-15
Picalm	5.55e-17	3.47521e-15
Prcp	5.55e-17	3.47521e-15
Serpinh1	5.55e-17	3.47521e-15
Rps3	5.55e-17	3.47521e-15
Ucp2	5.55e-17	3.47521e-15
Hbb-bt	5.55e-17	3.47521e-15
Hbb-bs	5.55e-17	3.47521e-15
Cavin3	5.55e-17	3.47521e-15
Ilk	5.55e-17	3.47521e-15
Rpl27a	5.55e-17	3.47521e-15
Rps13	5.55e-17	3.47521e-15
Rps15a	5.55e-17	3.47521e-15
Arl6ip1	5.55e-17	3.47521e-15
Ndufab1	5.55e-17	3.47521e-15
Il4ra	5.55e-17	3.47521e-15
Coro1a	5.55e-17	3.47521e-15
Mvp	5.55e-17	3.47521e-15
Vkorc1	5.55e-17	3.47521e-15
Cox6a2	5.55e-17	3.47521e-15
Adam8	5.55e-17	3.47521e-15
Cox8b	5.55e-17	3.47521e-15
Ifitm2	5.55e-17	3.47521e-15
Ifitm3	5.55e-17	3.47521e-15
Rnh1	5.55e-17	3.47521e-15
Irf7	5.55e-17	3.47521e-15
Taldo1	5.55e-17	3.47521e-15
Rplp2	5.55e-17	3.47521e-15
Tspan4	5.55e-17	3.47521e-15
Ctsd	5.55e-17	3.47521e-15
Lsp1	5.55e-17	3.47521e-15
Col4a1	5.55e-17	3.47521e-15
Col4a2	5.55e-17	3.47521e-15
Lamp1	5.55e-17	3.47521e-15
Myom2	5.55e-17	3.47521e-15
Sfrp1	5.55e-17	3.47521e-15
Slc25a4	5.55e-17	3.47521e-15
Acsl1	5.55e-17	3.47521e-15
Spcs3	5.55e-17	3.47521e-15
Hmgb2	5.55e-17	3.47521e-15
Lpl	5.55e-17	3.47521e-15
Ndufa13	5.55e-17	3.47521e-15
Crlf1	5.55e-17	3.47521e-15
Ifi30	5.55e-17	3.47521e-15
Rpl18a	5.55e-17	3.47521e-15
Myo9b	5.55e-17	3.47521e-15
Plvap	5.55e-17	3.47521e-15
Bst2	5.55e-17	3.47521e-15
Colgalt1	5.55e-17	3.47521e-15
Tpm4	5.55e-17	3.47521e-15
Hmox1	5.55e-17	3.47521e-15
Calr	5.55e-17	3.47521e-15
Adcy7	5.55e-17	3.47521e-15
Mt2	5.55e-17	3.47521e-15
Mt1	5.55e-17	3.47521e-15
Cotl1	5.55e-17	3.47521e-15
Cox4i1	5.55e-17	3.47521e-15
Cyba	5.55e-17	3.47521e-15
Aprt	5.55e-17	3.47521e-15
Rpl13	5.55e-17	3.47521e-15
Acta1	5.55e-17	3.47521e-15
Itgb1	5.55e-17	3.47521e-15
Col5a3	5.55e-17	3.47521e-15
Stt3a	5.55e-17	3.47521e-15
Hspa8	5.55e-17	3.47521e-15
Thy1	5.55e-17	3.47521e-15
Mcam	5.55e-17	3.47521e-15
Rps25	5.55e-17	3.47521e-15
Atp5l	5.55e-17	3.47521e-15
Tagln	5.55e-17	3.47521e-15
Rexo2	5.55e-17	3.47521e-15
Sdhd	5.55e-17	3.47521e-15
Cryab	5.55e-17	3.47521e-15
Acat1	5.55e-17	3.47521e-15
Etfa	5.55e-17	3.47521e-15
Cox5a	5.55e-17	3.47521e-15
Loxl1	5.55e-17	3.47521e-15
Hexa	5.55e-17	3.47521e-15
Pkm	5.55e-17	3.47521e-15
Rplp1	5.55e-17	3.47521e-15
Rpl4	5.55e-17	3.47521e-15
Plekho2	5.55e-17	3.47521e-15
Ppib	5.55e-17	3.47521e-15
Tpm1	5.55e-17	3.47521e-15
Anxa2	5.55e-17	3.47521e-15
Aldh1a2	5.55e-17	3.47521e-15
Eef1a1	5.55e-17	3.47521e-15
Cox7a2	5.55e-17	3.47521e-15
Tmed3	5.55e-17	3.47521e-15
Ctsh	5.55e-17	3.47521e-15
Rbp1	5.55e-17	3.47521e-15
Rpl29	5.55e-17	3.47521e-15
Manf	5.55e-17	3.47521e-15
Gnai2	5.55e-17	3.47521e-15
Rhoa	5.55e-17	3.47521e-15
Gpx1	5.55e-17	3.47521e-15
Shisa5	5.55e-17	3.47521e-15
Myl3	5.55e-17	3.47521e-15
Pdcd6ip	5.55e-17	3.47521e-15
Crtap	5.55e-17	3.47521e-15
Rpsa	5.55e-17	3.47521e-15
Rpl14	5.55e-17	3.47521e-15
Ctnnb1	5.55e-17	3.47521e-15
Lars2	5.55e-17	3.47521e-15
Rps12	5.55e-17	3.47521e-15
Ccn2	5.55e-17	3.47521e-15
Enpp1	5.55e-17	3.47521e-15
Marcks	5.55e-17	3.47521e-15
Lilr4b	5.55e-17	3.47521e-15
Lilrb4a	5.55e-17	3.47521e-15
Pln	5.55e-17	3.47521e-15
Psap	5.55e-17	3.47521e-15
Mif	5.55e-17	3.47521e-15
Chchd10	5.55e-17	3.47521e-15
Col6a2	5.55e-17	3.47521e-15
Col6a1	5.55e-17	3.47521e-15
Col18a1	5.55e-17	3.47521e-15
Itgb2	5.55e-17	3.47521e-15
Cstb	5.55e-17	3.47521e-15
Ptbp1	5.55e-17	3.47521e-15
Cnn2	5.55e-17	3.47521e-15
Arhgap45	5.55e-17	3.47521e-15
Sbno2	5.55e-17	3.47521e-15
Rps15	5.55e-17	3.47521e-15
Uqcr11	5.55e-17	3.47521e-15
Eef2	5.55e-17	3.47521e-15
Txnrd1	5.55e-17	3.47521e-15
Ckap4	5.55e-17	3.47521e-15
Hsp90b1	5.55e-17	3.47521e-15
Slc25a3	5.55e-17	3.47521e-15
Dcn	5.55e-17	3.47521e-15
Lum	5.55e-17	3.47521e-15
Csrp2	5.55e-17	3.47521e-15
Nap1l1	5.55e-17	3.47521e-15
Lyz2	5.55e-17	3.47521e-15
Rap1b	5.55e-17	3.47521e-15
Lrp1	5.55e-17	3.47521e-15
Naca	5.55e-17	3.47521e-15
Atp5b	5.55e-17	3.47521e-15
Myl6	5.55e-17	3.47521e-15
Rpl41	5.55e-17	3.47521e-15
Rps26	5.55e-17	3.47521e-15
Cd63	5.55e-17	3.47521e-15
Ewsr1	5.55e-17	3.47521e-15
Aebp1	5.55e-17	3.47521e-15
Ogdh	5.55e-17	3.47521e-15
Ppia	5.55e-17	3.47521e-15
Igfbp3	5.55e-17	3.47521e-15
Sec61g	5.55e-17	3.47521e-15
Actr2	5.55e-17	3.47521e-15
Mdh1	5.55e-17	3.47521e-15
Rps27a	5.55e-17	3.47521e-15
Rtn4	5.55e-17	3.47521e-15
Hba-a1	5.55e-17	3.47521e-15
Hba-a2	5.55e-17	3.47521e-15
Npm1	5.55e-17	3.47521e-15
Rack1	5.55e-17	3.47521e-15
Sqstm1	5.55e-17	3.47521e-15
Canx	5.55e-17	3.47521e-15
Adamts2	5.55e-17	3.47521e-15
Hnrnpab	5.55e-17	3.47521e-15
Uqcrq	5.55e-17	3.47521e-15
Hint1	5.55e-17	3.47521e-15
Gpx3	5.55e-17	3.47521e-15
Gm2a	5.55e-17	3.47521e-15
Sparc	5.55e-17	3.47521e-15
Atox1	5.55e-17	3.47521e-15
Mfap4	5.55e-17	3.47521e-15
Ubb	5.55e-17	3.47521e-15
2410006H16Rik	5.55e-17	3.47521e-15
Rpl26	5.55e-17	3.47521e-15
Cd68	5.55e-17	3.47521e-15
Eif4a1	5.55e-17	3.47521e-15
Eif5a	5.55e-17	3.47521e-15
Gabarap	5.55e-17	3.47521e-15
Acadvl	5.55e-17	3.47521e-15
Arrb2	5.55e-17	3.47521e-15
Cxcl16	5.55e-17	3.47521e-15
Pfn1	5.55e-17	3.47521e-15
Eno3	5.55e-17	3.47521e-15
Txndc17	5.55e-17	3.47521e-15
Serpinf1	5.55e-17	3.47521e-15
Myo1c	5.55e-17	3.47521e-15
Rpl23a	5.55e-17	3.47521e-15
Lgals9	5.55e-17	3.47521e-15
Ccl2	5.55e-17	3.47521e-15
Ccl7	5.55e-17	3.47521e-15
Ccl8	5.55e-17	3.47521e-15
Ccl9	5.55e-17	3.47521e-15
Ccl6	5.55e-17	3.47521e-15
Wfdc17	5.55e-17	3.47521e-15
Vmp1	5.55e-17	3.47521e-15
Cltc	5.55e-17	3.47521e-15
Nme1	5.55e-17	3.47521e-15
Lrrc59	5.55e-17	3.47521e-15
Col1a1	5.55e-17	3.47521e-15
Atp5g1	5.55e-17	3.47521e-15
Kpnb1	5.55e-17	3.47521e-15
Rpl23	5.55e-17	3.47521e-15
Lasp1	5.55e-17	3.47521e-15
Rpl19	5.55e-17	3.47521e-15
Tcap	5.55e-17	3.47521e-15
Igfbp4	5.55e-17	3.47521e-15
Fkbp10	5.55e-17	3.47521e-15
Rab5c	5.55e-17	3.47521e-15
Rpl27	5.55e-17	3.47521e-15
Grn	5.55e-17	3.47521e-15
Mrc2	5.55e-17	3.47521e-15
Pecam1	5.55e-17	3.47521e-15
Ddx5	5.55e-17	3.47521e-15
Rpl38	5.55e-17	3.47521e-15
Atp5h	5.55e-17	3.47521e-15
H3f3b	5.55e-17	3.47521e-15
Srsf2	5.55e-17	3.47521e-15
Sept9	5.55e-17	3.47521e-15
Timp2	5.55e-17	3.47521e-15
Lgals3bp	5.55e-17	3.47521e-15
Actg1	5.55e-17	3.47521e-15
P4hb	5.55e-17	3.47521e-15
Arhgdia	5.55e-17	3.47521e-15
Sdc1	5.55e-17	3.47521e-15
Pdia6	5.55e-17	3.47521e-15
Rsad2	5.55e-17	3.47521e-15
Rps7	5.55e-17	3.47521e-15
Pxdn	5.55e-17	3.47521e-15
Rps29	5.55e-17	3.47521e-15
Rpl36al	5.55e-17	3.47521e-15
Hif1a	5.55e-17	3.47521e-15
Actn1	5.55e-17	3.47521e-15
Npc2	5.55e-17	3.47521e-15
Ltbp2	5.55e-17	3.47521e-15
Tgfb3	5.55e-17	3.47521e-15
Calm1	5.55e-17	3.47521e-15
Ndufb1-ps	5.55e-17	3.47521e-15
Lgmn	5.55e-17	3.47521e-15
Ifi27l2a	5.55e-17	3.47521e-15
Serpina3n	5.55e-17	3.47521e-15
Meg3	5.55e-17	3.47521e-15
Dync1h1	5.55e-17	3.47521e-15
Hsp90aa1	5.55e-17	3.47521e-15
Inf2	5.55e-17	3.47521e-15
Crip1	5.55e-17	3.47521e-15
Gdi2	5.55e-17	3.47521e-15
Pfkp	5.55e-17	3.47521e-15
Nid1	5.55e-17	3.47521e-15
BC005537	5.55e-17	3.47521e-15
Uqcrfs1	5.55e-17	3.47521e-15
Serpinb1a	5.55e-17	3.47521e-15
Serpinb6a	5.55e-17	3.47521e-15
Tubb2a	5.55e-17	3.47521e-15
Ssr1	5.55e-17	3.47521e-15
Txndc5	5.55e-17	3.47521e-15
Aspn	5.55e-17	3.47521e-15
Gadd45g	5.55e-17	3.47521e-15
Prelid1	5.55e-17	3.47521e-15
Dbn1	5.55e-17	3.47521e-15
Pdlim7	5.55e-17	3.47521e-15
Tmed9	5.55e-17	3.47521e-15
Tgfbi	5.55e-17	3.47521e-15
Hnrnpk	5.55e-17	3.47521e-15
Ctla2a	5.55e-17	3.47521e-15
Ctsl	5.55e-17	3.47521e-15
Uqcrb	5.55e-17	3.47521e-15
Ndufs6	5.55e-17	3.47521e-15
Sdha	5.55e-17	3.47521e-15
Ftl1-ps1	5.55e-17	3.47521e-15
Cox7c	5.55e-17	3.47521e-15
Vcan	5.55e-17	3.47521e-15
Tmem167	5.55e-17	3.47521e-15
Rps23	5.55e-17	3.47521e-15
Ckmt2	5.55e-17	3.47521e-15
Hexb	5.55e-17	3.47521e-15
Btf3	5.55e-17	3.47521e-15
Rpl15	5.55e-17	3.47521e-15
Rps24	5.55e-17	3.47521e-15
Arf4	5.55e-17	3.47521e-15
Tkt	5.55e-17	3.47521e-15
Stab1	5.55e-17	3.47521e-15
Nisch	5.55e-17	3.47521e-15
Lgals3	5.55e-17	3.47521e-15
Pnp	5.55e-17	3.47521e-15
Rnase4	5.55e-17	3.47521e-15
Myh6	5.55e-17	3.47521e-15
Myh7	5.55e-17	3.47521e-15
Ctsb	5.55e-17	3.47521e-15
Clu	5.55e-17	3.47521e-15
Loxl2	5.55e-17	3.47521e-15
Bmp1	5.55e-17	3.47521e-15
Itm2b	5.55e-17	3.47521e-15
Esd	5.55e-17	3.47521e-15
Lcp1	5.55e-17	3.47521e-15
Tpt1	5.55e-17	3.47521e-15
Selenop	5.55e-17	3.47521e-15
Rpl37	5.55e-17	3.47521e-15
Dab2	5.55e-17	3.47521e-15
Dap	5.55e-17	3.47521e-15
Snhg18	5.55e-17	3.47521e-15
Rpl30	5.55e-17	3.47521e-15
Cox6c	5.55e-17	3.47521e-15
Pabpc1	5.55e-17	3.47521e-15
Ywhaz	5.55e-17	3.47521e-15
Cthrc1	5.55e-17	3.47521e-15
Col14a1	5.55e-17	3.47521e-15
Ndufb9	5.55e-17	3.47521e-15
Ly6e	5.55e-17	3.47521e-15
Ly6a	5.55e-17	3.47521e-15
Plec	5.55e-17	3.47521e-15
Rpl8	5.55e-17	3.47521e-15
Mb	5.55e-17	3.47521e-15
Myh9	5.55e-17	3.47521e-15
C1qtnf6	5.55e-17	3.47521e-15
Rac2	5.55e-17	3.47521e-15
Cyth4	5.55e-17	3.47521e-15
Lgals1	5.55e-17	3.47521e-15
Ddx17	5.55e-17	3.47521e-15
Rpl3	5.55e-17	3.47521e-15
Atf4	5.55e-17	3.47521e-15
Aco2	5.55e-17	3.47521e-15
Cyb5r3	5.55e-17	3.47521e-15
Tspo	5.55e-17	3.47521e-15
Pfkm	5.55e-17	3.47521e-15
Tuba1b	5.55e-17	3.47521e-15
Tuba1a	5.55e-17	3.47521e-15
Tuba1c	5.55e-17	3.47521e-15
Hnrnpa1	5.55e-17	3.47521e-15
Itga5	5.55e-17	3.47521e-15
Litaf	5.55e-17	3.47521e-15
Ap2m1	5.55e-17	3.47521e-15
Rpl35a	5.55e-17	3.47521e-15
Heg1	5.55e-17	3.47521e-15
Itgb5	5.55e-17	3.47521e-15
Fstl1	5.55e-17	3.47521e-15
Ccdc80	5.55e-17	3.47521e-15
Rpl24	5.55e-17	3.47521e-15
Col8a1	5.55e-17	3.47521e-15
Atp5j	5.55e-17	3.47521e-15
App	5.55e-17	3.47521e-15
Atp5o	5.55e-17	3.47521e-15
Rcan1	5.55e-17	3.47521e-15
Hmgn1	5.55e-17	3.47521e-15
Sod2	5.55e-17	3.47521e-15
Thbs2	5.55e-17	3.47521e-15
Tnfrsf12a	5.55e-17	3.47521e-15
Atp6v0c	5.55e-17	3.47521e-15
Eci1	5.55e-17	3.47521e-15
Rps2	5.55e-17	3.47521e-15
Ndufb10	5.55e-17	3.47521e-15
Rpl3l	5.55e-17	3.47521e-15
Rps10	5.55e-17	3.47521e-15
Rpl10a	5.55e-17	3.47521e-15
Ndufv3	5.55e-17	3.47521e-15
Angptl4	5.55e-17	3.47521e-15
Rps28	5.55e-17	3.47521e-15
Tapbp	5.55e-17	3.47521e-15
Rps18	5.55e-17	3.47521e-15
H2-K1	5.55e-17	3.47521e-15
Slc39a7	5.55e-17	3.47521e-15
Tap1	5.55e-17	3.47521e-15
H2-Ab1	5.55e-17	3.47521e-15
H2-Aa	5.55e-17	3.47521e-15
H2-Eb1	5.55e-17	3.47521e-15
Clic1	5.55e-17	3.47521e-15
Aif1	5.55e-17	3.47521e-15
Lst1	5.55e-17	3.47521e-15
H2-D1	5.55e-17	3.47521e-15
Ier3	5.55e-17	3.47521e-15
Flot1	5.55e-17	3.47521e-15
Tubb5	5.55e-17	3.47521e-15
Ppp1r18	5.55e-17	3.47521e-15
Gm42418	5.55e-17	3.47521e-15
Pla2g7	5.55e-17	3.47521e-15
Trem2	5.55e-17	3.47521e-15
C3	5.55e-17	3.47521e-15
Myl12b	5.55e-17	3.47521e-15
Myl12a	5.55e-17	3.47521e-15
Calm2	5.55e-17	3.47521e-15
Snrpd1	5.55e-17	3.47521e-15
Ecscr	5.55e-17	3.47521e-15
Dpysl3	5.55e-17	3.47521e-15
Lox	5.55e-17	3.47521e-15
Ppic	5.55e-17	3.47521e-15
Synpo	5.55e-17	3.47521e-15
Rps14	5.55e-17	3.47521e-15
Cd74	5.55e-17	3.47521e-15
Csf1r	5.55e-17	3.47521e-15
Tubb6	5.55e-17	3.47521e-15
Acaa2	5.55e-17	3.47521e-15
Rpl17	5.55e-17	3.47521e-15
Atp5a1	5.55e-17	3.47521e-15
Cndp2	5.55e-17	3.47521e-15
Tcirg1	5.55e-17	3.47521e-15
Unc93b1	5.55e-17	3.47521e-15
Efemp2	5.55e-17	3.47521e-15
Cfl1	5.55e-17	3.47521e-15
Ltbp3	5.55e-17	3.47521e-15
Neat1	5.55e-17	3.47521e-15
Fau	5.55e-17	3.47521e-15
Ppp1r14b	5.55e-17	3.47521e-15
Vegfb	5.55e-17	3.47521e-15
Slc3a2	5.55e-17	3.47521e-15
Snhg1	5.55e-17	3.47521e-15
Eef1g	5.55e-17	3.47521e-15
Fth1	5.55e-17	3.47521e-15
Ddb1	5.55e-17	3.47521e-15
Ms4a7	5.55e-17	3.47521e-15
Ms4a6d	5.55e-17	3.47521e-15
Mpeg1	5.55e-17	3.47521e-15
Anxa1	5.55e-17	3.47521e-15
Acta2	5.55e-17	3.47521e-15
Lipa	5.55e-17	3.47521e-15
Ankrd1	5.55e-17	3.47521e-15
Pgam1	5.55e-17	3.47521e-15
Scd2	5.55e-17	3.47521e-15
Ndufb8	5.55e-17	3.47521e-15
Atp5md	5.55e-17	3.47521e-15
Rbm3	5.55e-17	3.47521e-15
Ndufb11	5.55e-17	3.47521e-15
Timp1	5.55e-17	3.47521e-15
Cfp	5.55e-17	3.47521e-15
Rpl39	5.55e-17	3.47521e-15
Lamp2	5.55e-17	3.47521e-15
Apln	5.55e-17	3.47521e-15
Fhl1	5.55e-17	3.47521e-15
Bgn	5.55e-17	3.47521e-15
Ssr4	5.55e-17	3.47521e-15
Flna	5.55e-17	3.47521e-15
Rpl10	5.55e-17	3.47521e-15
Maged1	5.55e-17	3.47521e-15
Msn	5.55e-17	3.47521e-15
Rps4x	5.55e-17	3.47521e-15
Cox7b	5.55e-17	3.47521e-15
Pgk1	5.55e-17	3.47521e-15
Sh3bgrl	5.55e-17	3.47521e-15
Srpx2	5.55e-17	3.47521e-15
Rpl36a	5.55e-17	3.47521e-15
Tceal9	5.55e-17	3.47521e-15
Morf4l2	5.55e-17	3.47521e-15
Sat1	5.55e-17	3.47521e-15
Prdx4	5.55e-17	3.47521e-15
Tmsb4x	5.55e-17	3.47521e-15
Gm47283	5.55e-17	3.47521e-15
mt-Nd1	5.55e-17	3.47521e-15
mt-Co2	5.55e-17	3.47521e-15
mt-Atp8	5.55e-17	3.47521e-15
mt-Atp6	5.55e-17	3.47521e-15
mt-Co3	5.55e-17	3.47521e-15
mt-Nd3	5.55e-17	3.47521e-15
mt-Nd4l	5.55e-17	3.47521e-15
mt-Nd4	5.55e-17	3.47521e-15
mt-Nd5	5.55e-17	3.47521e-15
mt-Cytb	5.55e-17	3.47521e-15
Igfbp5	1.11022e-16	6.41971e-15
Tnnt2	1.11022e-16	6.41971e-15
Dpt	1.11022e-16	6.41971e-15
Crat	1.11022e-16	6.41971e-15
Cpxm1	1.11022e-16	6.41971e-15
H13	1.11022e-16	6.41971e-15
Ccn5	1.11022e-16	6.41971e-15
Ptgis	1.11022e-16	6.41971e-15
Lhfp	1.11022e-16	6.41971e-15
Tm4sf1	1.11022e-16	6.41971e-15
Casq2	1.11022e-16	6.41971e-15
Ostc	1.11022e-16	6.41971e-15
Wls	1.11022e-16	6.41971e-15
Dnaja1	1.11022e-16	6.41971e-15
Srm	1.11022e-16	6.41971e-15
Eno1	1.11022e-16	6.41971e-15
Mxra8	1.11022e-16	6.41971e-15
Cd36	1.11022e-16	6.41971e-15
Parm1	1.11022e-16	6.41971e-15
Coro1c	1.11022e-16	6.41971e-15
Ubc	1.11022e-16	6.41971e-15
Nipsnap2	1.11022e-16	6.41971e-15
Akr1b8	1.11022e-16	6.41971e-15
Axl	1.11022e-16	6.41971e-15
Pld3	1.11022e-16	6.41971e-15
Capns1	1.11022e-16	6.41971e-15
Snrnp70	1.11022e-16	6.41971e-15
Bax	1.11022e-16	6.41971e-15
Nupr1	1.11022e-16	6.41971e-15
H19	1.11022e-16	6.41971e-15
Cd81	1.11022e-16	6.41971e-15
Cttn	1.11022e-16	6.41971e-15
Junb	1.11022e-16	6.41971e-15
Adam10	1.11022e-16	6.41971e-15
Uqcrc1	1.11022e-16	6.41971e-15
Lama4	1.11022e-16	6.41971e-15
Srgn	1.11022e-16	6.41971e-15
Dbnl	1.11022e-16	6.41971e-15
Slc2a4	1.11022e-16	6.41971e-15
Pitpna	1.11022e-16	6.41971e-15
Nxn	1.11022e-16	6.41971e-15
Stat3	1.11022e-16	6.41971e-15
Cavin1	1.11022e-16	6.41971e-15
Vat1	1.11022e-16	6.41971e-15
Rnf213	1.11022e-16	6.41971e-15
Anxa7	1.11022e-16	6.41971e-15
Oxct1	1.11022e-16	6.41971e-15
Kdelr3	1.11022e-16	6.41971e-15
Fbln1	1.11022e-16	6.41971e-15
Nckap1l	1.11022e-16	6.41971e-15
Carhsp1	1.11022e-16	6.41971e-15
Zc3h7a	1.11022e-16	6.41971e-15
Hcls1	1.11022e-16	6.41971e-15
Cd47	1.11022e-16	6.41971e-15
Mtch1	1.11022e-16	6.41971e-15
Tomm6	1.11022e-16	6.41971e-15
Sipa1	1.11022e-16	6.41971e-15
Fads3	1.11022e-16	6.41971e-15
Ndufa1	1.11022e-16	6.41971e-15
Tceal8	1.11022e-16	6.41971e-15
mt-Nd2	1.11022e-16	6.41971e-15
mt-Co1	1.11022e-16	6.41971e-15
Sf3b1	2.22045e-16	1.21637e-14
Arl8a	2.22045e-16	1.21637e-14
Ivns1abp	2.22045e-16	1.21637e-14
Ncf2	2.22045e-16	1.21637e-14
Serping1	2.22045e-16	1.21637e-14
Nes	2.22045e-16	1.21637e-14
Psmb4	2.22045e-16	1.21637e-14
Myoz2	2.22045e-16	1.21637e-14
Tardbp	2.22045e-16	1.21637e-14
Chchd2	2.22045e-16	1.21637e-14
Ndufb2	2.22045e-16	1.21637e-14
Gars	2.22045e-16	1.21637e-14
Cd9	2.22045e-16	1.21637e-14
Ehd2	2.22045e-16	1.21637e-14
Nucb1	2.22045e-16	1.21637e-14
Rhog	2.22045e-16	1.21637e-14
Timm10b	2.22045e-16	1.21637e-14
Ankrd10	2.22045e-16	1.21637e-14
Gdf15	2.22045e-16	1.21637e-14
Trir	2.22045e-16	1.21637e-14
Mmp2	2.22045e-16	1.21637e-14
Tmem208	2.22045e-16	1.21637e-14
Rps27l	2.22045e-16	1.21637e-14
Mrpl42	2.22045e-16	1.21637e-14
Esyt1	2.22045e-16	1.21637e-14
Uqcr10	2.22045e-16	1.21637e-14
Srsf1	2.22045e-16	1.21637e-14
Prkar1a	2.22045e-16	1.21637e-14
Fam104a	2.22045e-16	1.21637e-14
Wdr89	2.22045e-16	1.21637e-14
Evl	2.22045e-16	1.21637e-14
Lrtm1	2.22045e-16	1.21637e-14
Mrpl52	2.22045e-16	1.21637e-14
Prr13	2.22045e-16	1.21637e-14
Ranbp1	2.22045e-16	1.21637e-14
Nrros	2.22045e-16	1.21637e-14
Ndufb4	2.22045e-16	1.21637e-14
Ifnar2	2.22045e-16	1.21637e-14
Srrm2	2.22045e-16	1.21637e-14
Cdkn1a	2.22045e-16	1.21637e-14
Zfp36l2	2.22045e-16	1.21637e-14
Ppp1ca	2.22045e-16	1.21637e-14
Ganab	2.22045e-16	1.21637e-14
Plp2	2.22045e-16	1.21637e-14
Xist	2.22045e-16	1.21637e-14
Tmem106a	4.44089e-16	2.42705e-14
Pld4	4.44089e-16	2.42705e-14
Pcna	5.55112e-16	3.01972e-14
Vcam1	5.55112e-16	3.01972e-14
Itpripl2	5.55112e-16	3.01972e-14
Tmod3	5.55112e-16	3.01972e-14
Phyh	6.66134e-16	3.60275e-14
Trp53i11	6.66134e-16	3.60275e-14
Pakap-1	6.66134e-16	3.60275e-14
Arhgef1	6.66134e-16	3.60275e-14
Rangap1	6.66134e-16	3.60275e-14
Sec31a	7.77156e-16	4.18869e-14
Psmb8	7.77156e-16	4.18869e-14
Maged2	7.77156e-16	4.18869e-14
Hmgn2	8.88178e-16	4.75425e-14
Ikbkb	8.88178e-16	4.75425e-14
Atp1b3	8.88178e-16	4.75425e-14
Mprip	8.88178e-16	4.75425e-14
Trim47	8.88178e-16	4.75425e-14
Lamb1	8.88178e-16	4.75425e-14
Ptpn6	1.22125e-15	6.52963e-14
Ap2s1	1.33227e-15	7.11511e-14
Rab11a	1.44329e-15	7.6905e-14
Ndufa12	1.44329e-15	7.6905e-14
Myadm	1.55431e-15	8.26328e-14
Ostf1	1.55431e-15	8.26328e-14
Prnp	2.22045e-15	1.17779e-13
Cybb	2.22045e-15	1.17779e-13
Cd34	3.10862e-15	1.64519e-13
Bola2	3.10862e-15	1.64519e-13
Dstn	3.33067e-15	1.75872e-13
Ssbp4	3.33067e-15	1.75872e-13
Asah1	3.44169e-15	1.8153e-13
Nedd4	3.55271e-15	1.86546e-13
Scn5a	3.55271e-15	1.86546e-13
Prkcd	3.55271e-15	1.86546e-13
Hnrnpul2	3.55271e-15	1.86546e-13
Itga7	3.9968e-15	2.09629e-13
Uba7	4.32987e-15	2.26591e-13
U2af1	4.32987e-15	2.26591e-13
Mpc1	5.10703e-15	2.66665e-13
Eif1a	5.10703e-15	2.66665e-13
Map1lc3a	5.44009e-15	2.8374e-13
Odc1	5.55112e-15	2.89208e-13
Vsir	5.77316e-15	3.00109e-13
Clptm1l	5.77316e-15	3.00109e-13
Cers2	6.66134e-15	3.45512e-13
Tcf25	6.66134e-15	3.45512e-13
Actn2	7.10543e-15	3.68139e-13
Stk25	8.10463e-15	4.18982e-13
Fkbp7	8.10463e-15	4.18982e-13
Snd1	9.10383e-15	4.70118e-13
Cd151	9.54792e-15	4.92507e-13
Pkd1	9.65894e-15	4.97686e-13
Adgre1	1.02141e-14	5.2571e-13
Elk3	1.03251e-14	5.30841e-13
Capzb	1.08802e-14	5.58156e-13
Cebpd	1.08802e-14	5.58156e-13
Itm2c	1.13243e-14	5.80302e-13
Pcbp2	1.19904e-14	6.13096e-13
Hsp90ab1	1.19904e-14	6.13096e-13
Wsb1	1.22125e-14	6.23769e-13
Eif2s2	1.28786e-14	6.57076e-13
Rnf19b	1.38778e-14	7.07285e-13
Jund	1.39888e-14	7.12169e-13
Fes	1.42109e-14	7.21904e-13
Pi16	1.42109e-14	7.21904e-13
Nptn	1.4877e-14	7.54924e-13
Efnb3	1.57652e-14	7.98264e-13
Tm9sf3	1.57652e-14	7.98264e-13
Snx3	1.66533e-14	8.42326e-13
Pygm	1.70974e-14	8.63856e-13
Aup1	1.86517e-14	9.41372e-13
Man2a1	1.90958e-14	9.61713e-13
Stx5a	1.90958e-14	9.61713e-13
Eif4b	1.9762e-14	9.94193e-13
Srsf3	2.15383e-14	1.0824e-12
Pgs1	2.23155e-14	1.12025e-12
Idh3b	2.26485e-14	1.13575e-12
Ldb3	2.69784e-14	1.35143e-12
Pls3	2.77556e-14	1.38888e-12
Cmya5	3.34177e-14	1.67043e-12
Galnt1	3.4639e-14	1.72962e-12
H2afy	3.5083e-14	1.74993e-12
Tmem43	3.59712e-14	1.79233e-12
Ier5	3.87468e-14	1.92857e-12
Atp6v0e	3.93019e-14	1.95413e-12
Cfh	4.17444e-14	2.07337e-12
Wwp2	4.35207e-14	2.15931e-12
Gngt2	4.41869e-14	2.19004e-12
Gpi1	4.4631e-14	2.20971e-12
AC149090.1	4.50751e-14	2.22934e-12
Scpep1	4.76286e-14	2.35315e-12
Nono	5.16254e-14	2.54793e-12
Swi5	5.24025e-14	2.58356e-12
Tuba8	5.44009e-14	2.67927e-12
Gask1b	5.52891e-14	2.72015e-12
Sema3f	5.81757e-14	2.85916e-12
Nab1	6.00631e-14	2.94883e-12
B4galt3	6.10623e-14	2.99474e-12
Arfgap1	6.12843e-14	3.00249e-12
Ehmt2	7.02771e-14	3.43947e-12
Arf1	7.79377e-14	3.81041e-12
Trim25	8.02691e-14	3.92031e-12
Snhg3	8.81517e-14	4.3008e-12
Tax1bp3	1.03251e-13	5.03222e-12
Cct8	1.05915e-13	5.15672e-12
Atp13a2	1.09912e-13	5.34576e-12
Ndufv2	1.13465e-13	5.51282e-12
Meox1	1.20237e-13	5.83581e-12
Slfn2	1.27454e-13	6.17967e-12
Spcs1	1.3145e-13	6.36686e-12
Plekho1	1.33449e-13	6.45698e-12
Atp6v0b	1.35669e-13	6.55764e-12
Cdc42se1	1.39888e-13	6.75459e-12
Fxyd6	1.4222e-13	6.86009e-12
Ywhab	1.48548e-13	7.15797e-12
Ces1d	1.50546e-13	7.24681e-12
Pgam2	1.51656e-13	7.29276e-12
Rps6ka3	1.58651e-13	7.62128e-12
Sept7	1.63203e-13	7.83191e-12
Dlgap4	1.73195e-13	8.30291e-12
Igf1	1.74083e-13	8.33695e-12
Calm3	1.78857e-13	8.55683e-12
Eln	1.79523e-13	8.57994e-12
Ppp1r9b	1.80744e-13	8.6295e-12
Vars	1.93179e-13	9.21378e-12
Tgfb1i1	1.9984e-13	9.5218e-12
Gpx8	2.12608e-13	1.01198e-11
Dad1	2.16605e-13	1.02892e-11
Sf1	2.16493e-13	1.02892e-11
Pde4dip	2.1827e-13	1.03578e-11
Mgst3	2.3781e-13	1.12736e-11
Ptpn1	2.4003e-13	1.13674e-11
Ccl21a	2.54685e-13	1.20492e-11
Adprh	2.76001e-13	1.30445e-11
Cct5	2.77334e-13	1.30943e-11
Ckb	2.80442e-13	1.32277e-11
Cebpb	3.062e-13	1.44281e-11
Lrrc32	3.13083e-13	1.47376e-11
Selenom	3.38396e-13	1.59131e-11
Slc1a5	3.43836e-13	1.61527e-11
Zfas1	3.45279e-13	1.62043e-11
Abi1	3.47056e-13	1.62714e-11
Rrm1	3.52385e-13	1.65047e-11
Ifi27	3.53717e-13	1.65505e-11
Rab6a	3.71703e-13	1.73747e-11
Ccnl2	3.73479e-13	1.74404e-11
Safb2	3.73923e-13	1.74437e-11
Sec22b	3.81251e-13	1.77678e-11
H2afj	3.83471e-13	1.78535e-11
P4ha2	3.84803e-13	1.78978e-11
Ube2v1	3.85691e-13	1.79138e-11
M6pr	3.85914e-13	1.79138e-11
Skil	4.03899e-13	1.87302e-11
Eef1a2	4.04454e-13	1.87374e-11
Tspan9	4.07896e-13	1.88781e-11
Vwa1	4.5175e-13	2.08871e-11
Idh3a	4.92051e-13	2.2728e-11
Flnb	4.92606e-13	2.27313e-11
Srsf7	5.12479e-13	2.3625e-11
Txlnb	5.3435e-13	2.46091e-11
Gmppa	5.37792e-13	2.47432e-11
Nrep	5.93192e-13	2.72654e-11
Got2	6.67355e-13	3.06441e-11
Cox8a	6.70353e-13	3.07516e-11
1110038B12Rik	6.87894e-13	3.15254e-11
Rac1	6.96443e-13	3.1886e-11
Cyc1	7.13429e-13	3.26318e-11
Uqcrc2	7.75713e-13	3.5446e-11
Arhgef40	7.94476e-13	3.6268e-11
Pdha1	8.12017e-13	3.70326e-11
Os9	8.37663e-13	3.81651e-11
Hsd17b12	8.80851e-13	4.00938e-11
Kdelr1	8.93507e-13	4.06304e-11
Hnrnpm	9.43468e-13	4.28606e-11
Stip1	9.89653e-13	4.49152e-11
Nmrk2	9.93206e-13	4.50328e-11
Sdhc	9.95537e-13	4.50948e-11
Prkab2	1.13876e-12	5.15324e-11
Ppp1cc	1.14753e-12	5.18792e-11
Mgat2	1.1906e-12	5.37747e-11
Ms4a6b	1.41909e-12	6.40327e-11
Tra2b	1.50113e-12	6.76696e-11
Blmh	1.54077e-12	6.93895e-11
Atxn10	1.58129e-12	7.11461e-11
Oaf	1.62403e-12	7.29991e-11
Tgfbr2	1.63514e-12	7.34277e-11
P3h3	1.65279e-12	7.41493e-11
Ptgds	1.83231e-12	8.21246e-11
Ccnd1	1.84686e-12	8.26973e-11
Psmd4	1.87228e-12	8.37556e-11
Pxn	1.95788e-12	8.75013e-11
Nras	2.02616e-12	9.04665e-11
Ubap2l	2.17848e-12	9.71749e-11
Ndufa8	2.22822e-12	9.91993e-11
Ppfibp1	2.23022e-12	9.91993e-11
Vasn	2.22844e-12	9.91993e-11
Rps27rt	2.46314e-12	1.09382e-10
Bak1	2.46381e-12	1.09382e-10
Phldb2	2.47979e-12	1.09987e-10
Csk	2.52243e-12	1.11772e-10
Bzw1	2.58349e-12	1.1437e-10
Cyfip1	2.70983e-12	1.1985e-10
Slc40a1	2.8173e-12	1.24485e-10
Map4k4	2.82152e-12	1.24554e-10
Csf2ra	2.87836e-12	1.26944e-10
Slc44a2	2.91311e-12	1.28355e-10
Rnasek	3.00682e-12	1.3236e-10
Srsf6	3.07387e-12	1.35184e-10
Ndufa2	3.11151e-12	1.36711e-10
Abracl	3.16902e-12	1.39108e-10
Eif3d	3.18234e-12	1.39562e-10
Adam9	3.2272e-12	1.41396e-10
Tns3	3.26872e-12	1.43082e-10
Por	3.40883e-12	1.49075e-10
Serinc3	3.55915e-12	1.55504e-10
Prkcsh	3.63198e-12	1.58538e-10
9530068E07Rik	3.71236e-12	1.61896e-10
Rab1a	4.09517e-12	1.78424e-10
H3f3a	4.13469e-12	1.79979e-10
Gclm	4.4087e-12	1.91727e-10
Mydgf	4.42568e-12	1.92288e-10
H2-T23	4.55547e-12	1.97743e-10
Sh3gl1	4.66582e-12	2.02346e-10
Ddx39b	5.17641e-12	2.24281e-10
Lman2	5.20006e-12	2.25098e-10
Creb3	5.22293e-12	2.25879e-10
Gnai3	5.25235e-12	2.26942e-10
Cd248	5.27023e-12	2.27504e-10
Icam1	5.65048e-12	2.43694e-10
Cdk4	5.78715e-12	2.49359e-10
Btg1	6.35825e-12	2.73715e-10
Golga7	7.03859e-12	3.02725e-10
Kctd17	7.36899e-12	3.16644e-10
Bckdha	7.46392e-12	3.20429e-10
Gba	7.8082e-12	3.34902e-10
Arglu1	8.25329e-12	3.53669e-10
Clic4	8.9897e-12	3.84873e-10
Tmem50a	9.05254e-12	3.8721e-10
Pomp	9.31188e-12	3.97939e-10
Sidt2	9.84968e-12	4.20538e-10
Hmgb1	9.91507e-12	4.22944e-10
Hnrnph1	1.11069e-11	4.73353e-10
Glmp	1.16778e-11	4.96778e-10
Rap1a	1.16704e-11	4.96778e-10
Tmpo	1.1986e-11	5.09426e-10
Gmfb	1.21592e-11	5.16319e-10
Arhgef2	1.23185e-11	5.2261e-10
Ubqln1	1.25515e-11	5.32015e-10
Bin1	1.30984e-11	5.54694e-10
Fuca2	1.32196e-11	5.59322e-10
Gm15543	1.33322e-11	5.63576e-10
Adarb1	1.35116e-11	5.70645e-10
Copz1	1.36828e-11	5.77355e-10
Zfp36	1.42811e-11	6.02058e-10
Ifngr1	1.47944e-11	6.23135e-10
Ndufa10	1.63536e-11	6.88189e-10
Rgs10	1.71263e-11	7.20059e-10
Ets1	1.71909e-11	7.22128e-10
Bhlhe40	1.77418e-11	7.44601e-10
Uba2	1.80745e-11	7.57886e-10
Jun	1.83353e-11	7.68134e-10
Atp6ap1	1.87348e-11	7.84167e-10
Sec24d	1.88034e-11	7.86336e-10
Inpp5d	1.93806e-11	8.0903e-10
Fam120a	1.93769e-11	8.0903e-10
Usp34	2.00684e-11	8.36995e-10
Arhgap1	2.08049e-11	8.66941e-10
Ugcg	2.11438e-11	8.80277e-10
Snrpe	2.42151e-11	1.00725e-09
Ndufs2	2.59346e-11	1.07782e-09
Tmem214	2.62013e-11	1.08794e-09
Gpaa1	2.68447e-11	1.11367e-09
Rasa4	2.7099e-11	1.12322e-09
Fmnl3	2.88713e-11	1.19562e-09
Gm26532	2.94083e-11	1.21678e-09
Zswim8	3.01197e-11	1.24512e-09
Acly	3.13081e-11	1.2931e-09
Ppp2ca	3.18865e-11	1.31583e-09
Fndc5	3.24811e-11	1.33919e-09
Tma7	3.30791e-11	1.36265e-09
Grk2	3.34792e-11	1.37792e-09
Uba52	3.49369e-11	1.43665e-09
Piezo1	3.60905e-11	1.48278e-09
Psma4	4.10514e-11	1.68513e-09
Smarcb1	4.16032e-11	1.70628e-09
Ndufs1	4.19804e-11	1.72025e-09
Slc25a11	4.2639e-11	1.74571e-09
1700120C14Rik	4.28875e-11	1.75434e-09
Metrnl	4.44581e-11	1.81701e-09
Srsf5	4.66518e-11	1.905e-09
Plod2	5.11222e-11	2.08573e-09
Slc39a13	5.17457e-11	2.10933e-09
Cib1	5.92919e-11	2.41484e-09
Il6st	6.41116e-11	2.60886e-09
Psmc4	6.59472e-11	2.68123e-09
Sorbs2	6.83217e-11	2.77536e-09
Anp32b	7.26612e-11	2.94908e-09
Fitm1	7.318e-11	2.96757e-09
Ndrg2	7.51516e-11	3.04488e-09
Dynlrb1	7.69579e-11	3.11537e-09
Sema7a	7.76703e-11	3.1415e-09
Cct4	8.13409e-11	3.28712e-09
Got1	8.41471e-11	3.39759e-09
Art3	9.57245e-11	3.86172e-09
Smarcd2	1.04065e-10	4.19459e-09
Ndufs3	1.09083e-10	4.39305e-09
Eef1d	1.13361e-10	4.56142e-09
Timm13	1.17074e-10	4.7068e-09
Arf3	1.19477e-10	4.79927e-09
Ywhaq	1.23287e-10	4.94806e-09
Jpt1	1.24594e-10	4.99624e-09
Slc38a10	1.26931e-10	5.08563e-09
Tnnc1	1.43366e-10	5.7392e-09
P2rx4	1.43759e-10	5.75002e-09
Tbrg1	1.46535e-10	5.85604e-09
Cbfb	1.47325e-10	5.8826e-09
Cbr2	1.50015e-10	5.98489e-09
Rrad	1.52943e-10	6.0965e-09
Adam19	1.56554e-10	6.23516e-09
Rasl11b	1.60525e-10	6.38789e-09
AI413582	1.61331e-10	6.41448e-09
Tnfaip1	1.63903e-10	6.51125e-09
Ube2l3	1.66177e-10	6.59598e-09
Cnpy2	1.69728e-10	6.73123e-09
Itgb1bp2	1.75686e-10	6.96161e-09
Vwa5a	1.85221e-10	7.33323e-09
S100a13	1.98949e-10	7.8701e-09
Man2b1	2.00482e-10	7.92404e-09
Tcp1	2.06927e-10	8.17189e-09
Ahnak	2.18539e-10	8.62321e-09
Txlna	2.35765e-10	9.29509e-09
Csnk1a1	2.59462e-10	1.02207e-08
Eif3h	2.64645e-10	1.04161e-08
Rcc2	2.87461e-10	1.13047e-08
Tram1	2.91614e-10	1.14584e-08
Fmc1	2.96115e-10	1.16255e-08
Clk1	3.04875e-10	1.19594e-08
Prrc2c	3.24967e-10	1.27368e-08
Klf6	3.25927e-10	1.27638e-08
Selenon	3.27272e-10	1.28057e-08
Armcx3	3.28879e-10	1.28579e-08
Chordc1	3.32363e-10	1.29833e-08
Supt5	3.46898e-10	1.35398e-08
Elovl1	3.50954e-10	1.36867e-08
Rassf1	3.52222e-10	1.37247e-08
Srsf9	3.62785e-10	1.41245e-08
Ddx3x	3.71951e-10	1.44694e-08
Rnf181	3.72707e-10	1.44867e-08
Atp6v1a	3.76788e-10	1.46332e-08
Stat2	3.85305e-10	1.49516e-08
Zfp207	3.98988e-10	1.54697e-08
Cmas	4.00307e-10	1.55081e-08
Ubxn4	4.48723e-10	1.73693e-08
Lgals8	4.51977e-10	1.74808e-08
Add1	4.69315e-10	1.81364e-08
Abce1	4.72866e-10	1.82586e-08
Adamts10	4.9726e-10	1.91847e-08
Selenoh	5.03186e-10	1.93973e-08
Agrn	5.17297e-10	1.99249e-08
Fus	5.17897e-10	1.99316e-08
Sf3a3	5.37451e-10	2.06672e-08
Parp3	5.58563e-10	2.14614e-08
Gls	5.91413e-10	2.27005e-08
Osmr	5.9178e-10	2.27005e-08
Dnm2	6.10048e-10	2.3382e-08
Atp6v0d1	6.13495e-10	2.34949e-08
Pltp	6.24553e-10	2.38915e-08
Riok3	6.24869e-10	2.38915e-08
Sec11a	6.35977e-10	2.42963e-08
St6galnac4	6.37189e-10	2.43228e-08
Gng5	6.67764e-10	2.54692e-08
Ypel5	7.11887e-10	2.713e-08
Fndc1	7.35489e-10	2.80066e-08
Ptbp3	7.51345e-10	2.85872e-08
Gorasp2	7.53797e-10	2.86572e-08
Atp5mpl	7.76842e-10	2.95094e-08
Ptgfrn	7.80691e-10	2.96315e-08
Atp5d	7.83439e-10	2.97118e-08
Pdk2	7.86124e-10	2.97894e-08
Plat	7.88265e-10	2.98465e-08
Fkbp3	8.01558e-10	3.03252e-08
Ier2	8.06808e-10	3.04992e-08
Fndc3b	8.15596e-10	3.08066e-08
Ndel1	8.22801e-10	3.10537e-08
Rtp4	8.29415e-10	3.12781e-08
Srp9	8.3278e-10	3.13797e-08
Xbp1	8.42254e-10	3.16857e-08
Ndufv1	8.42231e-10	3.16857e-08
Id2	8.4406e-10	3.17282e-08
Srsf11	8.48861e-10	3.18831e-08
Ldha	8.71005e-10	3.26886e-08
Gm10076	8.95259e-10	3.35719e-08
Notch4	9.00976e-10	3.37593e-08
Erh	9.3649e-10	3.50619e-08
Lyn	9.38513e-10	3.51096e-08
Coq10a	1.00167e-09	3.74423e-08
Rab4b	1.03622e-09	3.87028e-08
Myd88	1.05488e-09	3.93686e-08
Uba1	1.07541e-09	4.01026e-08
Ube2d3	1.08774e-09	4.05304e-08
Acot9	1.14072e-09	4.24705e-08
Ace	1.17075e-09	4.3554e-08
Aopep	1.17857e-09	4.38103e-08
Eif6	1.2434e-09	4.61835e-08
Sec11c	1.25806e-09	4.66908e-08
Ube2z	1.30491e-09	4.83915e-08
Kidins220	1.33261e-09	4.93795e-08
Sf3b3	1.43359e-09	5.30792e-08
Prpf31	1.46743e-09	5.42893e-08
Nars	1.51974e-09	5.61803e-08
Dazap1	1.573e-09	5.8103e-08
Ttll1	1.5962e-09	5.89137e-08
Ctdsp2	1.63292e-09	6.02214e-08
Apobec2	1.64236e-09	6.05219e-08
Acyp2	1.67586e-09	6.17078e-08
Psma2	1.67764e-09	6.1725e-08
Slc25a20	1.7238e-09	6.33736e-08
Pold4	1.77618e-09	6.52479e-08
Inppl1	1.90749e-09	7.00166e-08
Emc10	1.91927e-09	7.0394e-08
Dctn2	1.99044e-09	7.2947e-08
Tmed10	2.01454e-09	7.37728e-08
Nedd8	2.0397e-09	7.46356e-08
Slc43a2	2.11734e-09	7.74162e-08
Mrto4	2.20499e-09	8.05579e-08
Mcrip1	2.23136e-09	8.14579e-08
Pofut2	2.26839e-09	8.27453e-08
Cct6a	2.4308e-09	8.86006e-08
Mgat1	2.4353e-09	8.86955e-08
Ndfip1	2.48397e-09	9.03977e-08
Nt5dc2	2.61105e-09	9.49487e-08
Cd302	2.62097e-09	9.52355e-08
Ahnak2	2.64861e-09	9.61653e-08
Snx17	2.66403e-09	9.66501e-08
Cic	2.85954e-09	1.03663e-07
Idh3g	2.86416e-09	1.0375e-07
Adam17	2.8722e-09	1.03961e-07
Ip6k1	2.99371e-09	1.08276e-07
Dnajc10	3.06681e-09	1.10834e-07
Dpagt1	3.10738e-09	1.12213e-07
Dusp3	3.16468e-09	1.14194e-07
Tln2	3.21184e-09	1.15807e-07
Vcp	3.29828e-09	1.18832e-07
Prmt1	3.38428e-09	1.21837e-07
Plxnb2	3.45676e-09	1.24351e-07
Ift20	3.49136e-09	1.25499e-07
Rnf4	3.63206e-09	1.30456e-07
Pkd2	3.72932e-09	1.33847e-07
Samhd1	3.73811e-09	1.3406e-07
Nus1	3.83777e-09	1.37529e-07
Cox6b1	3.86034e-09	1.38232e-07
Atp6ap2	4.17114e-09	1.49247e-07
Tmem131	4.2095e-09	1.50504e-07
Tmed2	4.2258e-09	1.50972e-07
Vps29	4.44e-09	1.58395e-07
Gm49980	4.44035e-09	1.58395e-07
Bicc1	4.46798e-09	1.5926e-07
Xpot	4.4822e-09	1.59645e-07
Helz2	4.52797e-09	1.61153e-07
Znhit1	4.57366e-09	1.62655e-07
Fbln5	4.75908e-09	1.69121e-07
Mlf1	4.78694e-09	1.69982e-07
Aplp2	4.89904e-09	1.73831e-07
Cap1	4.95105e-09	1.75543e-07
Vps4b	4.99054e-09	1.7681e-07
Fosl2	5.07659e-09	1.79722e-07
Nrp2	5.08351e-09	1.79832e-07
Gnptab	5.12946e-09	1.8132e-07
Fam174b	5.22107e-09	1.84419e-07
Ube2q1	5.31195e-09	1.87488e-07
Hdac1	5.48455e-09	1.93434e-07
Nhp2	5.97609e-09	2.10611e-07
Dnajc3	6.07306e-09	2.13868e-07
Dnmt1	6.17711e-09	2.17369e-07
Mybpc3	6.44454e-09	2.26609e-07
Mapre1	6.52184e-09	2.29155e-07
Ppp1r12c	6.57747e-09	2.30937e-07
Sin3b	6.83404e-09	2.39765e-07
Uggt1	6.9922e-09	2.4513e-07
Gng12	7.1859e-09	2.51733e-07
Sdf4	7.76044e-09	2.71656e-07
Srgap2	7.86569e-09	2.75135e-07
Slc38a2	8.01142e-09	2.80024e-07
Fbl	8.04433e-09	2.80964e-07
Cdk9	8.15165e-09	2.845e-07
Chd8	8.30952e-09	2.89794e-07
Ankrd13a	8.44176e-09	2.94187e-07
Ptp4a2	8.97703e-09	3.12608e-07
Ddx39	9.09746e-09	3.16566e-07
Rps17	9.18876e-09	3.19506e-07
Cerk	9.28455e-09	3.22597e-07
Eif4ebp1	9.47278e-09	3.28894e-07
Acot13	1.00258e-08	3.47838e-07
Gatd3a	1.02845e-08	3.56547e-07
Lima1	1.06415e-08	3.68651e-07
Snx2	1.07515e-08	3.72188e-07
Eif4enif1	1.09493e-08	3.78753e-07
Impdh1	1.10275e-08	3.81178e-07
Nmt1	1.13219e-08	3.91064e-07
Ptpra	1.14747e-08	3.96052e-07
S100a16	1.16512e-08	4.01846e-07
Psen1	1.19988e-08	4.13531e-07
Dnajb11	1.26421e-08	4.35381e-07
Adamtsl2	1.30472e-08	4.49003e-07
Azin1	1.4546e-08	5.00215e-07
5031439G07Rik	1.46917e-08	5.04855e-07
Klc1	1.50337e-08	5.16227e-07
Igsf8	1.53655e-08	5.27234e-07
Pam	1.56141e-08	5.35372e-07
Cmtm3	1.56648e-08	5.36717e-07
Derl2	1.58908e-08	5.44064e-07
Ap2a2	1.60543e-08	5.49261e-07
Mogs	1.61205e-08	5.51123e-07
Sumo2	1.6518e-08	5.64301e-07
Hdgf	1.66656e-08	5.68927e-07
Epb41l2	1.69055e-08	5.76697e-07
Tubb4b	1.70481e-08	5.81139e-07
Cops9	1.72837e-08	5.88742e-07
Dhrs7c	1.74805e-08	5.95013e-07
Tie1	1.87614e-08	6.38149e-07
Mpzl1	1.89838e-08	6.4501e-07
Cyb5a	1.89907e-08	6.4501e-07
Fubp1	2.12134e-08	7.19981e-07
Derl1	2.15434e-08	7.30652e-07
Mafb	2.19337e-08	7.43351e-07
Lman1	2.23663e-08	7.57463e-07
Ergic3	2.28445e-08	7.73099e-07
Atp6v1c1	2.2887e-08	7.73978e-07
Clic5	2.31425e-08	7.82055e-07
Sbf1	2.43787e-08	8.23236e-07
Snrpa	2.48711e-08	8.39258e-07
Capza2	2.66162e-08	8.97499e-07
Blvrb	2.67767e-08	9.02261e-07
Xaf1	2.79921e-08	9.42538e-07
Tmem182	2.82093e-08	9.49167e-07
Copa	2.86997e-08	9.64976e-07
Eif4e2	2.93248e-08	9.84846e-07
Tmem59	2.93327e-08	9.84846e-07
Tor1aip2	2.95951e-08	9.92943e-07
Lrg1	3.00569e-08	1.00771e-06
Fkbp4	3.09974e-08	1.03851e-06
Sulf2	3.10428e-08	1.03928e-06
Acot2	3.13758e-08	1.04968e-06
Psmb1	3.18573e-08	1.06503e-06
Tmem189	3.26082e-08	1.08935e-06
Doc2g	3.3183e-08	1.10777e-06
Syngr2	3.36187e-08	1.12151e-06
Mrpl33	3.39355e-08	1.13127e-06
Tmem123	3.75238e-08	1.25e-06
Syk	3.75546e-08	1.25014e-06
Fgfr1	3.84119e-08	1.27777e-06
Ndufs4	3.96584e-08	1.3183e-06
Supt20	3.98637e-08	1.32419e-06
Snrpc	4.14696e-08	1.37655e-06
Xdh	4.24801e-08	1.4091e-06
Man1b1	4.3287e-08	1.43485e-06
Bnip2	4.34216e-08	1.43829e-06
Mapk3	4.42687e-08	1.46531e-06
Gpr153	4.46003e-08	1.47525e-06
Snrpf	4.48643e-08	1.48293e-06
Srl	4.53875e-08	1.49917e-06
Ap3d1	4.60831e-08	1.52107e-06
Syncrip	4.65764e-08	1.53627e-06
Etf1	4.72459e-08	1.55726e-06
Map11	4.85404e-08	1.5988e-06
Ndufa6	4.8671e-08	1.60197e-06
Tgfbr1	4.9146e-08	1.61647e-06
Kcnip2	4.95724e-08	1.62935e-06
Clip4	5.10304e-08	1.6761e-06
Copb1	5.21431e-08	1.71144e-06
Scamp2	5.24623e-08	1.72072e-06
Creld2	5.28743e-08	1.73302e-06
Fh1	5.43376e-08	1.77973e-06
Ap3s1	5.61599e-08	1.83813e-06
Gng11	5.70153e-08	1.86483e-06
Ergic1	5.73419e-08	1.8742e-06
Mob1a	5.75237e-08	1.87883e-06
Arhgap23	5.94359e-08	1.93993e-06
Lrrc58	6.0205e-08	1.96367e-06
Stx16	6.06698e-08	1.97745e-06
Nsun2	6.10314e-08	1.98785e-06
Tbc1d20	6.15961e-08	2.00485e-06
Man1c1	6.28468e-08	2.04272e-06
Bud31	6.2836e-08	2.04272e-06
Zmiz1	6.51229e-08	2.11524e-06
Dst	6.55495e-08	2.12626e-06
Rnpep	6.55533e-08	2.12626e-06
Tbcb	6.64678e-08	2.15443e-06
Ndufs5	6.65662e-08	2.15613e-06
Nabp2	6.76662e-08	2.19025e-06
Czib	6.79511e-08	2.19795e-06
Llph	6.82681e-08	2.20668e-06
Wdr26	6.92415e-08	2.2366e-06
Adnp	7.05692e-08	2.27792e-06
Ppa1	7.09045e-08	2.28716e-06
Xpo1	7.43817e-08	2.39768e-06
Ssb	7.66968e-08	2.4706e-06
Cdh5	7.75222e-08	2.49547e-06
Grina	7.94542e-08	2.55591e-06
Ipo9	8.16916e-08	2.62608e-06
Rbfox2	8.20724e-08	2.63651e-06
Rras2	8.30331e-08	2.66554e-06
4931406P16Rik	8.44996e-08	2.71077e-06
Tmem30a	8.94948e-08	2.86905e-06
Rab7	8.96454e-08	2.87191e-06
Pxmp2	9.48921e-08	3.03792e-06
Xpnpep1	9.58501e-08	3.06649e-06
Folr2	9.90436e-08	3.16649e-06
Atp2b1	9.93991e-08	3.17569e-06
Trim3	1.0503e-07	3.35331e-06
Sept8	1.06174e-07	3.38753e-06
Eftud2	1.07284e-07	3.41828e-06
Matn2	1.07264e-07	3.41828e-06
Otulin	1.0743e-07	3.42061e-06
Ppfia1	1.08754e-07	3.46042e-06
Aoc3	1.10047e-07	3.49919e-06
Ece1	1.12004e-07	3.55899e-06
Tmem165	1.17543e-07	3.73245e-06
Ndst1	1.23725e-07	3.92611e-06
Fam193b	1.24595e-07	3.95102e-06
Mpdu1	1.26816e-07	4.01874e-06
Cand1	1.27731e-07	4.045e-06
Aars	1.2889e-07	4.07894e-06
Psmc3	1.29086e-07	4.0824e-06
Dpysl2	1.29197e-07	4.08312e-06
Pdlim5	1.29515e-07	4.09042e-06
Coq8a	1.337e-07	4.21975e-06
Dysf	1.4319e-07	4.51623e-06
Shc1	1.45137e-07	4.57456e-06
Snx1	1.49213e-07	4.69986e-06
Ddx6	1.50384e-07	4.73358e-06
Dpm2	1.51051e-07	4.75137e-06
Scyl1	1.53255e-07	4.81747e-06
Hnrnpdl	1.60948e-07	5.0559e-06
Snrpb	1.61666e-07	5.07506e-06
Osbpl9	1.6528e-07	5.18501e-06
Atp1a1	1.67179e-07	5.24108e-06
Hdlbp	1.68212e-07	5.26993e-06
Atxn7l3	1.72365e-07	5.39645e-06
Tomm22	1.81924e-07	5.69191e-06
Set	1.84694e-07	5.77472e-06
Errfi1	1.84995e-07	5.78027e-06
U2af2	1.85675e-07	5.79765e-06
Kctd10	1.85895e-07	5.80066e-06
Pcdh1	1.86963e-07	5.8301e-06
Arf6	1.88218e-07	5.86533e-06
Twf1	1.88668e-07	5.87543e-06
Ndrg1	1.90513e-07	5.92897e-06
Usp9x	1.90701e-07	5.93086e-06
Aspscr1	1.95828e-07	6.08629e-06
Celf1	1.98462e-07	6.16404e-06
Map4k3	2.00409e-07	6.2204e-06
Zfp36l1	2.05553e-07	6.37583e-06
Nipa2	2.07691e-07	6.43789e-06
Ppp6r1	2.16841e-07	6.71708e-06
Caprin1	2.17126e-07	6.72144e-06
Ap2b1	2.23783e-07	6.92294e-06
Nktr	2.28168e-07	7.05394e-06
Noc2l	2.32832e-07	7.19339e-06
Ski	2.34335e-07	7.23504e-06
Luc7l3	2.41121e-07	7.43965e-06
Smarca4	2.41746e-07	7.45403e-06
Ppp1r13b	2.43281e-07	7.49644e-06
Galnt2	2.46198e-07	7.58134e-06
Actr1a	2.55828e-07	7.87269e-06
Ube2i	2.72421e-07	8.37782e-06
Apbb1	2.7261e-07	8.37813e-06
Chmp6	2.75642e-07	8.46576e-06
Cct2	2.76111e-07	8.47461e-06
Rbm39	2.76644e-07	8.48541e-06
Tuba4a	2.78609e-07	8.54007e-06
Mapre2	2.81135e-07	8.61188e-06
Arcn1	2.82617e-07	8.65162e-06
Ndufa9	2.86882e-07	8.77642e-06
Oas2	2.98028e-07	9.11147e-06
Rsu1	2.98414e-07	9.11731e-06
Psma3	3.02196e-07	9.22683e-06
G3bp2	3.05915e-07	9.3343e-06
Med21	3.07025e-07	9.36208e-06
Pprc1	3.07394e-07	9.36724e-06
Usp14	3.09626e-07	9.42911e-06
Arl1	3.12377e-07	9.5067e-06
Gm44386	3.1455e-07	9.56664e-06
Commd7	3.19163e-07	9.69618e-06
Klf2	3.19224e-07	9.69618e-06
Park7	3.30489e-07	1.00319e-05
Dusp6	3.49218e-07	1.05935e-05
Rbms1	3.53611e-07	1.07136e-05
Elavl1	3.53634e-07	1.07136e-05
Smyd1	3.60061e-07	1.09012e-05
Mxra7	3.60537e-07	1.09086e-05
Ubr4	3.645e-07	1.10214e-05
Kcnk3	3.65301e-07	1.10385e-05
Bcap31	3.6604e-07	1.10537e-05
Itm2a	3.69186e-07	1.11415e-05
Ctps	3.73894e-07	1.12763e-05
Eid1	3.82715e-07	1.15349e-05
Ehd4	3.8607e-07	1.16211e-05
Arrb1	3.86062e-07	1.16211e-05
Serbp1	3.93567e-07	1.18392e-05
Plod1	4.01575e-07	1.20723e-05
Rras	4.02016e-07	1.20778e-05
Eif3l	4.0441e-07	1.21419e-05
Sumo3	4.1119e-07	1.23376e-05
Slc43a3	4.19622e-07	1.25825e-05
Gadd45b	4.23602e-07	1.26937e-05
Get4	4.45071e-07	1.33285e-05
Becn1	4.52663e-07	1.35472e-05
Fsd2	4.60884e-07	1.37845e-05
Ipo4	4.78405e-07	1.42994e-05
Eva1b	4.85398e-07	1.44991e-05
Parva	4.8823e-07	1.45651e-05
Bcl7c	4.88077e-07	1.45651e-05
Degs1	4.96443e-07	1.48007e-05
Trip12	5.04058e-07	1.50182e-05
Mylk3	5.08675e-07	1.51461e-05
Atp13a3	5.1574e-07	1.53467e-05
Acvrl1	5.19163e-07	1.54388e-05
Sri	5.22367e-07	1.55242e-05
Fasn	5.24932e-07	1.55905e-05
Coq9	5.47573e-07	1.62527e-05
Ddx56	5.58644e-07	1.65708e-05
Tmem258	5.73163e-07	1.69907e-05
Naa50	5.81889e-07	1.72385e-05
Psma1	5.96759e-07	1.76678e-05
Eif4h	5.99603e-07	1.77408e-05
Mcfd2	6.06804e-07	1.79425e-05
Pkp2	6.09169e-07	1.80011e-05
Dtymk	6.13358e-07	1.81134e-05
Pfdn5	6.20713e-07	1.83191e-05
2510039O18Rik	6.24368e-07	1.84154e-05
Slc39a14	6.41963e-07	1.89224e-05
Cers5	6.5517e-07	1.92995e-05
Crk	6.59276e-07	1.94083e-05
Tfdp1	6.62674e-07	1.94961e-05
Ano10	6.76986e-07	1.98921e-05
Tbca	6.76569e-07	1.98921e-05
Gns	7.28125e-07	2.13814e-05
Tmbim6	7.44406e-07	2.18458e-05
Cpt1b	7.48205e-07	2.19435e-05
Brip1os	7.80197e-07	2.28674e-05
Rpl9-ps6	8.0851e-07	2.36825e-05
Ccdc12	8.23263e-07	2.40899e-05
Malat1	8.23447e-07	2.40899e-05
Jak2	8.30323e-07	2.42758e-05
Csnk1d	8.35241e-07	2.44044e-05
Shmt2	8.38209e-07	2.44759e-05
Map2k2	8.38754e-07	2.44765e-05
Pygb	8.44143e-07	2.46184e-05
Rarres2	8.48066e-07	2.47175e-05
Ddit3	8.697e-07	2.53322e-05
Ccnl1	8.71299e-07	2.5363e-05
1810037I17Rik	8.72992e-07	2.53965e-05
Asb11	8.91422e-07	2.59166e-05
Dbndd2	8.99976e-07	2.61491e-05
Rbm17	9.13745e-07	2.65327e-05
Shroom3	9.27891e-07	2.69267e-05
Lsm4	9.31412e-07	2.70121e-05
Tra2a	9.60987e-07	2.78526e-05
Eif2s3x	9.79553e-07	2.83732e-05
Diaph1	9.83956e-07	2.84831e-05
H1f0	1.01475e-06	2.93562e-05
Psmb5	1.03546e-06	2.99371e-05
Ppp2r5d	1.05629e-06	3.05203e-05
Fitm2	1.07424e-06	3.10198e-05
Emc3	1.14257e-06	3.29726e-05
Prpf4b	1.17026e-06	3.3751e-05
Pmp22	1.17159e-06	3.37686e-05
Arhgef7	1.19116e-06	3.42903e-05
Psmd3	1.19107e-06	3.42903e-05
Hint3	1.19767e-06	3.44567e-05
Crip2	1.20604e-06	3.4676e-05
Usf2	1.22948e-06	3.53284e-05
Srrt	1.24523e-06	3.5759e-05
Plxna1	1.27297e-06	3.65333e-05
Atp6v1b2	1.27431e-06	3.65493e-05
Scamp3	1.27653e-06	3.65905e-05
Pros1	1.28535e-06	3.68209e-05
Eif5	1.39401e-06	3.99091e-05
Creg1	1.4019e-06	4.01105e-05
Gsr	1.41779e-06	4.05403e-05
Gna13	1.42259e-06	4.06527e-05
Hspa14	1.43506e-06	4.09842e-05
Ndufs7	1.44988e-06	4.13821e-05
Traf7	1.4558e-06	4.15258e-05
Rab11fip5	1.46235e-06	4.16873e-05
Vamp3	1.46537e-06	4.17479e-05
Map4	1.49159e-06	4.24692e-05
Abcc5	1.52055e-06	4.32674e-05
Nxf1	1.53656e-06	4.36963e-05
Vwa8	1.53764e-06	4.37005e-05
Slc41a3	1.54196e-06	4.37967e-05
Tesc	1.58631e-06	4.50292e-05
Ext2	1.61203e-06	4.57315e-05
Ralb	1.65537e-06	4.69327e-05
Esyt2	1.67973e-06	4.75944e-05
Cct7	1.77401e-06	5.02354e-05
Epn1	1.79574e-06	5.08201e-05
Usp50	1.79746e-06	5.08382e-05
Exoc7	1.83562e-06	5.1886e-05
Sdc2	1.84063e-06	5.19961e-05
Ubtd1	1.87332e-06	5.28877e-05
Rap1gds1	2.02592e-06	5.71616e-05
Cox19	2.05035e-06	5.7816e-05
Brd2	2.06713e-06	5.82542e-05
Sh3pxd2a	2.08397e-06	5.86933e-05
Vamp8	2.09786e-06	5.90491e-05
Slc35b2	2.11023e-06	5.93616e-05
Man1a	2.13237e-06	5.99484e-05
Cope	2.13555e-06	6.00019e-05
Kif5b	2.21884e-06	6.23046e-05
Rpl36	2.23305e-06	6.26661e-05
Map3k11	2.23565e-06	6.27014e-05
Kctd20	2.298e-06	6.44115e-05
Hnrnpa0	2.30608e-06	6.45994e-05
Prrc1	2.30751e-06	6.46009e-05
Pak2	2.33359e-06	6.52918e-05
Snx5	2.34429e-06	6.55521e-05
Psmc1	2.34809e-06	6.56192e-05
Trappc1	2.3843e-06	6.65913e-05
Rad23b	2.40489e-06	6.71264e-05
Lrrc39	2.42209e-06	6.75661e-05
Fam32a	2.42482e-06	6.76022e-05
Myzap	2.43043e-06	6.77183e-05
Gbp2	2.44662e-06	6.81287e-05
Poldip3	2.53357e-06	7.04736e-05
Snhg9	2.53384e-06	7.04736e-05
Hnrnph2	2.59186e-06	7.20445e-05
Supt6	2.61646e-06	7.26853e-05
Rps19bp1	2.65795e-06	7.37941e-05
AW549877	2.67273e-06	7.41605e-05
Snrpd2	2.68583e-06	7.44798e-05
Vdac1	2.7024e-06	7.4895e-05
Ephx2	2.72076e-06	7.53593e-05
Furin	2.7252e-06	7.54377e-05
Slc48a1	2.73974e-06	7.57954e-05
Cyb5r4	2.81751e-06	7.79007e-05
Tut7	2.87794e-06	7.95248e-05
Maz	2.89211e-06	7.98692e-05
Golga2	2.94202e-06	8.11994e-05
Ptrh2	2.95585e-06	8.15334e-05
Smim7	2.95848e-06	8.15578e-05
Cebpg	3.0418e-06	8.38052e-05
Golph3	3.04944e-06	8.39665e-05
Cltb	3.07486e-06	8.46167e-05
Arap1	3.12402e-06	8.59191e-05
Yipf7	3.13131e-06	8.60689e-05
Arf5	3.15399e-06	8.66414e-05
Akap13	3.17332e-06	8.71214e-05
Sfpq	3.30978e-06	9.08146e-05
Zc3h15	3.37246e-06	9.24801e-05
2900097C17Rik	3.37622e-06	9.25291e-05
Rps27	3.41891e-06	9.36436e-05
Tmem38a	3.42088e-06	9.36436e-05
Med10	3.42501e-06	9.37019e-05
Csnk2a2	3.55087e-06	9.70884e-05
Nsmf	3.67391e-06	0.000100336
Dnajb6	3.67279e-06	0.000100336
Pdgfb	3.68849e-06	0.000100675
Ubr5	3.70512e-06	0.00010107
Impdh2	3.75425e-06	0.000102291
Eif3a	3.75311e-06	0.000102291
Ninj1	3.78294e-06	0.000103013
Grk6	3.84603e-06	0.00010467
Sypl	3.87438e-06	0.00010538
Neu1	3.92414e-06	0.000106672
Cdk5rap3	3.9668e-06	0.000107769
Phf23	4.04989e-06	0.000109962
Arpp19	4.06925e-06	0.000110424
Pa2g4	4.10117e-06	0.000111226
Ufm1	4.23064e-06	0.000114671
Obscn	4.23705e-06	0.000114778
Sars	4.26407e-06	0.000115443
Kctd12	4.41107e-06	0.000119354
Elp2	4.42162e-06	0.00011957
Pnpla2	4.44773e-06	0.000120207
Vwf	4.46108e-06	0.000120498
Cnih4	4.4964e-06	0.000121312
Sympk	4.49457e-06	0.000121312
Man2a2	4.52147e-06	0.000121919
Ogn	4.55559e-06	0.000122768
Wipf1	4.60611e-06	0.000124058
Cdk5	4.6179e-06	0.000124304
Cd2bp2	4.68973e-06	0.000126165
Gm16286	4.77438e-06	0.000128369
Cldn5	5.01222e-06	0.000134686
Mcee	5.06794e-06	0.000136105
Fabp4	5.13952e-06	0.000137949
Atp13a1	5.18746e-06	0.000139155
Arpc1a	5.22343e-06	0.00014004
Cs	5.2597e-06	0.000140932
Mical2	5.32745e-06	0.000142666
Zeb2	5.33389e-06	0.000142757
Eng	5.39268e-06	0.000144248
Wasf2	5.54807e-06	0.000148319
Dctn5	5.67093e-06	0.000151517
Eloa	5.74627e-06	0.000153443
Lamtor3	5.85294e-06	0.000156202
Scarf2	5.85631e-06	0.000156203
Fam98a	5.88564e-06	0.000156896
5430431A17Rik	5.94442e-06	0.000158297
Rnf130	5.94494e-06	0.000158297
Slc2a1	5.95693e-06	0.000158526
Tbl1xr1	6.07472e-06	0.000161568
Ppp4c	6.23439e-06	0.000165721
Tpp1	6.60864e-06	0.00017557
Ciao2b	6.72684e-06	0.000178609
Hnrnpr	6.81402e-06	0.000180766
Trim28	6.81581e-06	0.000180766
Plekha2	6.86048e-06	0.000181848
Scaf11	6.88813e-06	0.000182477
Brd9	6.98458e-06	0.000184928
Abhd17a	6.99641e-06	0.000185136
Ccnd3	7.12315e-06	0.000188384
Nckap1	7.13128e-06	0.000188492
Necap2	7.14615e-06	0.000188779
Ppp1r11	7.23041e-06	0.000190897
Mcmbp	7.24208e-06	0.000191097
Api5	7.25162e-06	0.000191241
Cdc42bpa	7.30439e-06	0.000192525
Tmem184b	7.35549e-06	0.000193762
Mbnl1	7.51343e-06	0.000197812
Tcf12	7.54193e-06	0.000198451
Usp4	7.6186e-06	0.000200356
Cmpk1	7.6355e-06	0.000200687
Cmtm7	7.98149e-06	0.000209663
Hdac3	8.00232e-06	0.000210093
Rnf40	8.05364e-06	0.000211322
Lrpap1	8.16185e-06	0.000214041
Anapc5	8.45884e-06	0.000221705
Gatad2a	8.58273e-06	0.000224827
Lmf2	8.8046e-06	0.00023051
Psma6	8.94715e-06	0.000234111
Gng10	9.02049e-06	0.000235898
Dtx3	9.1115e-06	0.000238145
Dhx15	9.13101e-06	0.000238522
Nfe2l2	9.22831e-06	0.000240929
Ncln	9.27664e-06	0.000242056
Btg2	9.43824e-06	0.000246136
Commd8	9.58427e-06	0.000249805
Nfat5	9.67492e-06	0.000252027
Rbms2	9.7103e-06	0.000252808
Morf4l1	9.87042e-06	0.000256834
Sgpl1	1.05915e-05	0.000275443
Acss1	1.06798e-05	0.000277586
Prkacb	1.07607e-05	0.000279533
Med15	1.10026e-05	0.000285659
Snhg12	1.10703e-05	0.000287258
Arl6ip4	1.11328e-05	0.000288719
Akap1	1.13099e-05	0.00029315
Midn	1.14058e-05	0.000295473
Fam49b	1.14401e-05	0.000296198
Ccdc124	1.15026e-05	0.000297652
Lsm5	1.16034e-05	0.000300093
Cnih1	1.17104e-05	0.000302694
Stx12	1.17811e-05	0.000304354
Cdc37	1.18561e-05	0.000306123
Scarb2	1.20083e-05	0.000309882
Egln1	1.20451e-05	0.000310658
Ints3	1.20783e-05	0.000311343
Nav1	1.21067e-05	0.000311905
Psmd14	1.21822e-05	0.000313677
Ptprs	1.22167e-05	0.000314393
Plekha1	1.24075e-05	0.000319128
Abhd12	1.24569e-05	0.000320221
Actr1b	1.27217e-05	0.00032685
Aldh4a1	1.27557e-05	0.000327545
Cpt2	1.29964e-05	0.000333542
Clec2d	1.30939e-05	0.000335861
Ywhag	1.32543e-05	0.000339788
Laptm4a	1.3396e-05	0.000343234
Rtraf	1.34326e-05	0.000343982
Gdi1	1.34674e-05	0.000344685
Sae1	1.37431e-05	0.000351549
Il13ra1	1.38275e-05	0.000353515
Plekhg2	1.4169e-05	0.000362049
Tug1	1.42153e-05	0.000363034
Pon2	1.45157e-05	0.000370504
Acp2	1.45454e-05	0.00037106
Wdr61	1.4643e-05	0.000373346
Ric8a	1.49184e-05	0.00038016
Prpsap1	1.53563e-05	0.000391107
Oga	1.54791e-05	0.000394019
Pgls	1.5489e-05	0.000394059
Rragc	1.57325e-05	0.000400035
F13a1	1.62528e-05	0.000413041
Msrb1	1.63489e-05	0.000415257
D8Ertd738e	1.6474e-05	0.000418164
Hbegf	1.64812e-05	0.000418164
Glrx	1.67365e-05	0.000424413
Rab3il1	1.74937e-05	0.000443375
Anxa6	1.76693e-05	0.000447583
Leng8	1.76963e-05	0.000448024
Trmt112	1.77304e-05	0.000448644
Sf3b2	1.80841e-05	0.000457346
Itsn2	1.8138e-05	0.000458463
Marf1	1.8184e-05	0.000459378
Dusp11	1.88367e-05	0.000475609
Fam168b	1.91215e-05	0.000482542
Fuca1	1.91865e-05	0.000483921
Ndufb7	1.92396e-05	0.000484999
Cherp	1.92961e-05	0.000486136
Polr2a	1.93055e-05	0.000486136
Prpf38b	1.94073e-05	0.000488437
Senp3	1.95254e-05	0.000491146
Sh3glb1	1.9723e-05	0.00049585
Ppid	1.97362e-05	0.000495914
Ap1s2	1.9771e-05	0.000496524
Fkbp8	1.99087e-05	0.000499447
Ifi35	1.99027e-05	0.000499447
Ltbr	1.99742e-05	0.000500821
Adamts1	2.03157e-05	0.00050911
Lims1	2.04819e-05	0.000513
Eed	2.05231e-05	0.000513758
Ifi203	2.05965e-05	0.00051532
Aplnr	2.10617e-05	0.00052668
Plpp1	2.11275e-05	0.000528041
Leprotl1	2.11438e-05	0.000528168
Prpf8	2.14087e-05	0.000534499
Psmd13	2.1477e-05	0.00053592
Rnps1	2.18644e-05	0.000545295
Pcbp4	2.24664e-05	0.000560012
Nos3	2.27052e-05	0.000565662
Plekhj1	2.29909e-05	0.000572475
Sucla2	2.32471e-05	0.000578546
Sec13	2.33542e-05	0.000580905
Rpl10-ps3	2.35254e-05	0.000584852
Vac14	2.40554e-05	0.000597711
Cyb561	2.42924e-05	0.00060328
P4ha1	2.45948e-05	0.000610465
Mndal	2.48614e-05	0.000616757
Mib1	2.50204e-05	0.000620372
Slc35f6	2.53572e-05	0.00062839
Usp48	2.54116e-05	0.000629404
Pdlim1	2.55431e-05	0.000632327
Slc20a1	2.5836e-05	0.000639066
Hsph1	2.58426e-05	0.000639066
Ptges3	2.58934e-05	0.000639985
Pgrmc2	2.60003e-05	0.000642069
Smc1a	2.60052e-05	0.000642069
Spag9	2.61383e-05	0.000645016
Znrd1	2.62039e-05	0.000646294
Ptprn	2.62434e-05	0.00064693
Nop56	2.66214e-05	0.000655902
B230219D22Rik	2.6724e-05	0.000658084
Ubxn1	2.89654e-05	0.000712904
Plaat3	2.95454e-05	0.000726796
Trf	2.96393e-05	0.000728725
Srprb	2.98148e-05	0.000732653
Psmc6	2.99409e-05	0.000735368
Raly	3.00022e-05	0.000736486
Dazap2	3.01466e-05	0.000739643
Map1s	3.12018e-05	0.000765132
Tcn2	3.14864e-05	0.000771706
Trim41	3.15586e-05	0.000772673
G6pc3	3.15588e-05	0.000772673
Slc6a8	3.17892e-05	0.000777907
Mcts1	3.25298e-05	0.000795615
Cript	3.29336e-05	0.000805069
Gsk3b	3.34912e-05	0.000818274
Ssu72	3.39887e-05	0.000829995
Dsp	3.53576e-05	0.000862973
Ramp2	3.57696e-05	0.000872576
Gosr2	3.64034e-05	0.000887574
Trappc5	3.6554e-05	0.000890783
Slc6a6	3.69079e-05	0.000898938
Vcl	3.73199e-05	0.000908502
Prrx1	3.76748e-05	0.000916664
Chmp5	3.81026e-05	0.000926591
Sord	3.84596e-05	0.000934787
Fgfr1op2	3.86304e-05	0.000938451
Plekhm2	3.87139e-05	0.000939993
Sav1	4.01387e-05	0.000974083
Hfe	4.074e-05	0.000988163
Arfip2	4.07886e-05	0.00098883
Chchd3	4.12371e-05	0.000999185
Paxbp1	4.13758e-05	0.00100203
Gpx4	4.16346e-05	0.00100777
Psmd2	4.1796e-05	0.00101116
Cct3	4.21381e-05	0.00101891
Ube2m	4.21671e-05	0.00101908
Uaca	4.23275e-05	0.00102243
Pdhb	4.26817e-05	0.00103046
Srek1	4.28037e-05	0.00103287
Suds3	4.29549e-05	0.00103598
Eps15	4.41499e-05	0.00106426
Sptan1	4.46504e-05	0.00107577
Pear1	4.52234e-05	0.00108901
Cflar	4.54014e-05	0.00109274
Ercc1	4.61312e-05	0.00110973
Ccdc50	4.6298e-05	0.00111317
Txnl4a	4.63743e-05	0.00111444
Chchd4	4.64307e-05	0.00111522
Emg1	4.65785e-05	0.0011182
Cygb	4.67853e-05	0.00112259
Gps2	4.74565e-05	0.00113811
Aen	4.78152e-05	0.00114612
Scn1b	4.81104e-05	0.00115261
Prep	4.83026e-05	0.00115662
Echs1	4.83916e-05	0.00115816
Rtn2	4.94567e-05	0.00118305
Ykt6	4.995e-05	0.00119424
Ube4b	5.02316e-05	0.00120036
Dpp8	5.08449e-05	0.00121439
Phf10	5.13087e-05	0.00122485
Ptpn12	5.13709e-05	0.00122571
Ogfr	5.14837e-05	0.00122777
Atxn2l	5.20042e-05	0.00123955
Rgs3	5.24759e-05	0.00125016
Snrpd3	5.27988e-05	0.00125722
Mta1	5.30827e-05	0.00126333
Mia3	5.31802e-05	0.00126501
Wac	5.32161e-05	0.00126522
Emcn	5.35431e-05	0.00127235
Pigt	5.43438e-05	0.00129072
Pdgfa	5.4932e-05	0.00130403
Cmss1	5.49919e-05	0.00130479
Mms19	5.57638e-05	0.00132244
Ryk	5.6669e-05	0.00134322
Ppt1	5.68482e-05	0.00134679
Triobp	5.76001e-05	0.00136391
Adgre5	5.79319e-05	0.00137108
Arfrp1	5.86467e-05	0.00138729
Trim11	5.88832e-05	0.00139218
Emc1	6.01092e-05	0.00142045
Son	6.03024e-05	0.0014243
Cdv3	6.08678e-05	0.00143693
Ap2a1	6.09255e-05	0.00143757
Chmp2a	6.17361e-05	0.00145596
Scrib	6.2207e-05	0.00146633
Car14	6.27868e-05	0.00147925
Vma21	6.29567e-05	0.00148251
Psmc2	6.32506e-05	0.00148868
Ubp1	6.32841e-05	0.00148872
Oxsr1	6.33808e-05	0.00149025
Plbd2	6.39854e-05	0.00150268
Commd4	6.4006e-05	0.00150268
Ncaph2	6.39479e-05	0.00150268
Gnas	6.52218e-05	0.00153046
Atf5	6.5661e-05	0.00153999
Psmb3	6.60812e-05	0.00154907
Sp100	6.67467e-05	0.00156389
[truncated: 533 more rows]

## Sheet: C
gene	combined_pvalue	adjusted_pvalue
Sulf1	5.55e-17	3.48588e-15
Tram1	5.55e-17	3.48588e-15
Rpl7	5.55e-17	3.48588e-15
Ptpn18	5.55e-17	3.48588e-15
Ankrd23	5.55e-17	3.48588e-15
Cox5b	5.55e-17	3.48588e-15
Rpl31	5.55e-17	3.48588e-15
Map4k4	5.55e-17	3.48588e-15
Il1r1	5.55e-17	3.48588e-15
Fhl2	5.55e-17	3.48588e-15
Col3a1	5.55e-17	3.48588e-15
Col5a2	5.55e-17	3.48588e-15
Slc40a1	5.55e-17	3.48588e-15
Eef1b2	5.55e-17	3.48588e-15
Acadl	5.55e-17	3.48588e-15
Fn1	5.55e-17	3.48588e-15
Rpl37a	5.55e-17	3.48588e-15
Igfbp5	5.55e-17	3.48588e-15
Arpc2	5.55e-17	3.48588e-15
Tmbim1	5.55e-17	3.48588e-15
Des	5.55e-17	3.48588e-15
Chpf	5.55e-17	3.48588e-15
Serpine2	5.55e-17	3.48588e-15
Itm2c	5.55e-17	3.48588e-15
Ncl	5.55e-17	3.48588e-15
Ptma	5.55e-17	3.48588e-15
Inpp5d	5.55e-17	3.48588e-15
Hjurp	5.55e-17	3.48588e-15
Col6a3	5.55e-17	3.48588e-15
Actr3	5.55e-17	3.48588e-15
Csrp1	5.55e-17	3.48588e-15
Phlda3	5.55e-17	3.48588e-15
Tnnt2	5.55e-17	3.48588e-15
Cfh	5.55e-17	3.48588e-15
Prg4	5.55e-17	3.48588e-15
Ivns1abp	5.55e-17	3.48588e-15
Arpc5	5.55e-17	3.48588e-15
Ncf2	5.55e-17	3.48588e-15
Lamc1	5.55e-17	3.48588e-15
Ier5	5.55e-17	3.48588e-15
Qsox1	5.55e-17	3.48588e-15
Soat1	5.55e-17	3.48588e-15
Gas5	5.55e-17	3.48588e-15
Dnm3os	5.55e-17	3.48588e-15
Atp1b1	5.55e-17	3.48588e-15
Mpc2	5.55e-17	3.48588e-15
Uck2	5.55e-17	3.48588e-15
Mgst3	5.55e-17	3.48588e-15
Fcgr2b	5.55e-17	3.48588e-15
Fcgr3	5.55e-17	3.48588e-15
Fcer1g	5.55e-17	3.48588e-15
Copa	5.55e-17	3.48588e-15
Pea15a	5.55e-17	3.48588e-15
Tagln2	5.55e-17	3.48588e-15
Hnrnpu	5.55e-17	3.48588e-15
Capn2	5.55e-17	3.48588e-15
Cd34	5.55e-17	3.48588e-15
Phyh	5.55e-17	3.48588e-15
Nudt5	5.55e-17	3.48588e-15
Atp5c1	5.55e-17	3.48588e-15
Vim	5.55e-17	3.48588e-15
Mrc1	5.55e-17	3.48588e-15
Npdc1	5.55e-17	3.48588e-15
Egfl7	5.55e-17	3.48588e-15
Rpl7a	5.55e-17	3.48588e-15
Surf4	5.55e-17	3.48588e-15
Col5a1	5.55e-17	3.48588e-15
Fam129b	5.55e-17	3.48588e-15
Rpl12	5.55e-17	3.48588e-15
Hspa5	5.55e-17	3.48588e-15
Gsn	5.55e-17	3.48588e-15
Rpl35	5.55e-17	3.48588e-15
Xirp2	5.55e-17	3.48588e-15
Atp5g3	5.55e-17	3.48588e-15
Hnrnpa3	5.55e-17	3.48588e-15
Ttn	5.55e-17	3.48588e-15
Frzb	5.55e-17	3.48588e-15
Itgav	5.55e-17	3.48588e-15
Selenoh	5.55e-17	3.48588e-15
Serping1	5.55e-17	3.48588e-15
Slc39a13	5.55e-17	3.48588e-15
Spi1	5.55e-17	3.48588e-15
Mybpc3	5.55e-17	3.48588e-15
Mdk	5.55e-17	3.48588e-15
Cd44	5.55e-17	3.48588e-15
Rcn1	5.55e-17	3.48588e-15
Actc1	5.55e-17	3.48588e-15
Thbs1	5.55e-17	3.48588e-15
Pdia3	5.55e-17	3.48588e-15
Serf2	5.55e-17	3.48588e-15
B2m	5.55e-17	3.48588e-15
AA467197	5.55e-17	3.48588e-15
Fbn1	5.55e-17	3.48588e-15
Sirpa	5.55e-17	3.48588e-15
Idh3b	5.55e-17	3.48588e-15
Cpxm1	5.55e-17	3.48588e-15
Prnd	5.55e-17	3.48588e-15
Dstn	5.55e-17	3.48588e-15
Rrbp1	5.55e-17	3.48588e-15
Snx5	5.55e-17	3.48588e-15
Cd93	5.55e-17	3.48588e-15
Cst3	5.55e-17	3.48588e-15
Fkbp1a	5.55e-17	3.48588e-15
Srxn1	5.55e-17	3.48588e-15
H13	5.55e-17	3.48588e-15
Rbm39	5.55e-17	3.48588e-15
Myl9	5.55e-17	3.48588e-15
Rpn2	5.55e-17	3.48588e-15
Tgm2	5.55e-17	3.48588e-15
Srsf6	5.55e-17	3.48588e-15
Ccn5	5.55e-17	3.48588e-15
Ube2c	5.55e-17	3.48588e-15
Ctsa	5.55e-17	3.48588e-15
Ptgis	5.55e-17	3.48588e-15
B4galt5	5.55e-17	3.48588e-15
Pmepa1	5.55e-17	3.48588e-15
Ctsz	5.55e-17	3.48588e-15
Atp5e	5.55e-17	3.48588e-15
Rps21	5.55e-17	3.48588e-15
Tpd52	5.55e-17	3.48588e-15
Fabp5	5.55e-17	3.48588e-15
Rpl22l1	5.55e-17	3.48588e-15
Ndufb5	5.55e-17	3.48588e-15
Anxa5	5.55e-17	3.48588e-15
Ndufc1	5.55e-17	3.48588e-15
Lhfp	5.55e-17	3.48588e-15
Postn	5.55e-17	3.48588e-15
Serp1	5.55e-17	3.48588e-15
Strit1	5.55e-17	3.48588e-15
Ssr3	5.55e-17	3.48588e-15
Etfdh	5.55e-17	3.48588e-15
Sfrp2	5.55e-17	3.48588e-15
Rps3a1	5.55e-17	3.48588e-15
Fcrls	5.55e-17	3.48588e-15
Nes	5.55e-17	3.48588e-15
Lmna	5.55e-17	3.48588e-15
Ssr2	5.55e-17	3.48588e-15
Arhgef2	5.55e-17	3.48588e-15
Gba	5.55e-17	3.48588e-15
Krtcap2	5.55e-17	3.48588e-15
Adam15	5.55e-17	3.48588e-15
Tpm3	5.55e-17	3.48588e-15
Slc39a1	5.55e-17	3.48588e-15
S100a4	5.55e-17	3.48588e-15
S100a6	5.55e-17	3.48588e-15
Sprr1a	5.55e-17	3.48588e-15
S100a11	5.55e-17	3.48588e-15
S100a10	5.55e-17	3.48588e-15
Cdc42se1	5.55e-17	3.48588e-15
Ctss	5.55e-17	3.48588e-15
Mcl1	5.55e-17	3.48588e-15
Ecm1	5.55e-17	3.48588e-15
Fcgr1	5.55e-17	3.48588e-15
Casq2	5.55e-17	3.48588e-15
Nras	5.55e-17	3.48588e-15
Olfml3	5.55e-17	3.48588e-15
Rhoc	5.55e-17	3.48588e-15
Capza1	5.55e-17	3.48588e-15
Atp5f1	5.55e-17	3.48588e-15
Cd53	5.55e-17	3.48588e-15
Vcam1	5.55e-17	3.48588e-15
Cnn3	5.55e-17	3.48588e-15
Myoz2	5.55e-17	3.48588e-15
Ostc	5.55e-17	3.48588e-15
Rpl34	5.55e-17	3.48588e-15
Hadh	5.55e-17	3.48588e-15
H2afz	5.55e-17	3.48588e-15
Selenof	5.55e-17	3.48588e-15
Ccn1	5.55e-17	3.48588e-15
Acadm	5.55e-17	3.48588e-15
Rps20	5.55e-17	3.48588e-15
Sdcbp	5.55e-17	3.48588e-15
Decr1	5.55e-17	3.48588e-15
Dnaja1	5.55e-17	3.48588e-15
B4galt1	5.55e-17	3.48588e-15
Ccl21a	5.55e-17	3.48588e-15
Vcp	5.55e-17	3.48588e-15
Tpm2	5.55e-17	3.48588e-15
Tln1	5.55e-17	3.48588e-15
Glipr2	5.55e-17	3.48588e-15
Clta	5.55e-17	3.48588e-15
Col15a1	5.55e-17	3.48588e-15
Sec61b	5.55e-17	3.48588e-15
Pakap-1	5.55e-17	3.48588e-15
Txn1	5.55e-17	3.48588e-15
Tnc	5.55e-17	3.48588e-15
Plin2	5.55e-17	3.48588e-15
Rps6	5.55e-17	3.48588e-15
Gpx7	5.55e-17	3.48588e-15
Uqcrh	5.55e-17	3.48588e-15
Akr1a1	5.55e-17	3.48588e-15
Prdx1	5.55e-17	3.48588e-15
Rps8	5.55e-17	3.48588e-15
Atp6v0b	5.55e-17	3.48588e-15
Elovl1	5.55e-17	3.48588e-15
P3h1	5.55e-17	3.48588e-15
Fhl3	5.55e-17	3.48588e-15
Rnf19b	5.55e-17	3.48588e-15
Marcksl1	5.55e-17	3.48588e-15
Col16a1	5.55e-17	3.48588e-15
Fabp3	5.55e-17	3.48588e-15
Sdc3	5.55e-17	3.48588e-15
Laptm5	5.55e-17	3.48588e-15
Atpif1	5.55e-17	3.48588e-15
Cd52	5.55e-17	3.48588e-15
Sh3bgrl3	5.55e-17	3.48588e-15
Stmn1	5.55e-17	3.48588e-15
Tmem50a	5.55e-17	3.48588e-15
Rsrp1	5.55e-17	3.48588e-15
Fuca1	5.55e-17	3.48588e-15
Rpl11	5.55e-17	3.48588e-15
Id3	5.55e-17	3.48588e-15
C1qb	5.55e-17	3.48588e-15
C1qc	5.55e-17	3.48588e-15
C1qa	5.55e-17	3.48588e-15
Cdc42	5.55e-17	3.48588e-15
Hspg2	5.55e-17	3.48588e-15
Ddost	5.55e-17	3.48588e-15
Pink1	5.55e-17	3.48588e-15
Sdhb	5.55e-17	3.48588e-15
Necap2	5.55e-17	3.48588e-15
Hspb7	5.55e-17	3.48588e-15
Efhd2	5.55e-17	3.48588e-15
Pdpn	5.55e-17	3.48588e-15
Nppb	5.55e-17	3.48588e-15
Nppa	5.55e-17	3.48588e-15
Srm	5.55e-17	3.48588e-15
Pgd	5.55e-17	3.48588e-15
Eno1	5.55e-17	3.48588e-15
Gpr153	5.55e-17	3.48588e-15
Rpl22	5.55e-17	3.48588e-15
Gnb1	5.55e-17	3.48588e-15
Mmp23	5.55e-17	3.48588e-15
Mxra8	5.55e-17	3.48588e-15
Sdf4	5.55e-17	3.48588e-15
Isg15	5.55e-17	3.48588e-15
Sri	5.55e-17	3.48588e-15
Cd36	5.55e-17	3.48588e-15
Fgl2	5.55e-17	3.48588e-15
AI506816	5.55e-17	3.48588e-15
Hadha	5.55e-17	3.48588e-15
Hadhb	5.55e-17	3.48588e-15
Emilin1	5.55e-17	3.48588e-15
Ywhah	5.55e-17	3.48588e-15
Wdr1	5.55e-17	3.48588e-15
Sod3	5.55e-17	3.48588e-15
Rpl9	5.55e-17	3.48588e-15
Uchl1	5.55e-17	3.48588e-15
Hopx	5.55e-17	3.48588e-15
Igfbp7	5.55e-17	3.48588e-15
Pf4	5.55e-17	3.48588e-15
Sept11	5.55e-17	3.48588e-15
Anxa3	5.55e-17	3.48588e-15
Sec31a	5.55e-17	3.48588e-15
Plac8	5.55e-17	3.48588e-15
Spp1	5.55e-17	3.48588e-15
Rpl5	5.55e-17	3.48588e-15
Atp5k	5.55e-17	3.48588e-15
Coro1c	5.55e-17	3.48588e-15
Oasl2	5.55e-17	3.48588e-15
Mlec	5.55e-17	3.48588e-15
Dynll1	5.55e-17	3.48588e-15
Cox6a1	5.55e-17	3.48588e-15
Rplp0	5.55e-17	3.48588e-15
Rpl6	5.55e-17	3.48588e-15
Erp29	5.55e-17	3.48588e-15
Myl2	5.55e-17	3.48588e-15
Arpc3	5.55e-17	3.48588e-15
Atp2a2	5.55e-17	3.48588e-15
Ubc	5.55e-17	3.48588e-15
Ran	5.55e-17	3.48588e-15
Nipsnap2	5.55e-17	3.48588e-15
Chchd2	5.55e-17	3.48588e-15
Gusb	5.55e-17	3.48588e-15
Lat2	5.55e-17	3.48588e-15
Eln	5.55e-17	3.48588e-15
Por	5.55e-17	3.48588e-15
Hspb1	5.55e-17	3.48588e-15
Plod3	5.55e-17	3.48588e-15
Ap1s1	5.55e-17	3.48588e-15
Serpine1	5.55e-17	3.48588e-15
Srrt	5.55e-17	3.48588e-15
Gnb2	5.55e-17	3.48588e-15
Pcolce	5.55e-17	3.48588e-15
Actb	5.55e-17	3.48588e-15
Fscn1	5.55e-17	3.48588e-15
Kdelr2	5.55e-17	3.48588e-15
Rac1	5.55e-17	3.48588e-15
Arpc1b	5.55e-17	3.48588e-15
Atp5j2	5.55e-17	3.48588e-15
Rpl21	5.55e-17	3.48588e-15
Alox5ap	5.55e-17	3.48588e-15
Col1a2	5.55e-17	3.48588e-15
Ndufa4	5.55e-17	3.48588e-15
Ndufa5	5.55e-17	3.48588e-15
Calu	5.55e-17	3.48588e-15
Flnc	5.55e-17	3.48588e-15
Mest	5.55e-17	3.48588e-15
Chchd3	5.55e-17	3.48588e-15
Akr1b8	5.55e-17	3.48588e-15
Cald1	5.55e-17	3.48588e-15
Mtpn	5.55e-17	3.48588e-15
Ndufb2	5.55e-17	3.48588e-15
Zyx	5.55e-17	3.48588e-15
Tmem176b	5.55e-17	3.48588e-15
Tmem176a	5.55e-17	3.48588e-15
Gpnmb	5.55e-17	3.48588e-15
Cycs	5.55e-17	3.48588e-15
Hnrnpa2b1	5.55e-17	3.48588e-15
Skap2	5.55e-17	3.48588e-15
Fkbp9	5.55e-17	3.48588e-15
Capg	5.55e-17	3.48588e-15
Tmsb10	5.55e-17	3.48588e-15
Dok1	5.55e-17	3.48588e-15
Loxl3	5.55e-17	3.48588e-15
Pcbp1	5.55e-17	3.48588e-15
Anxa4	5.55e-17	3.48588e-15
Copg1	5.55e-17	3.48588e-15
Rpn1	5.55e-17	3.48588e-15
Sec61a1	5.55e-17	3.48588e-15
Fbln2	5.55e-17	3.48588e-15
Edem1	5.55e-17	3.48588e-15
Camk1	5.55e-17	3.48588e-15
Arpc4	5.55e-17	3.48588e-15
Rpl32	5.55e-17	3.48588e-15
Plxnd1	5.55e-17	3.48588e-15
Cxcl12	5.55e-17	3.48588e-15
Hnrnpf	5.55e-17	3.48588e-15
Mfap5	5.55e-17	3.48588e-15
C3ar1	5.55e-17	3.48588e-15
Clec4n	5.55e-17	3.48588e-15
Clec4d	5.55e-17	3.48588e-15
Ptpn6	5.55e-17	3.48588e-15
P3h3	5.55e-17	3.48588e-15
Ptms	5.55e-17	3.48588e-15
Gapdh	5.55e-17	3.48588e-15
Tnfrsf1a	5.55e-17	3.48588e-15
Cd9	5.55e-17	3.48588e-15
Tspan9	5.55e-17	3.48588e-15
Emp1	5.55e-17	3.48588e-15
H2afj	5.55e-17	3.48588e-15
Mgp	5.55e-17	3.48588e-15
Arhgdib	5.55e-17	3.48588e-15
Ldhb	5.55e-17	3.48588e-15
Ndufa3	5.55e-17	3.48588e-15
Rps9	5.55e-17	3.48588e-15
Pirb	5.55e-17	3.48588e-15
Tnni3	5.55e-17	3.48588e-15
Rpl28	5.55e-17	3.48588e-15
Ube2s	5.55e-17	3.48588e-15
Rps5	5.55e-17	3.48588e-15
Selenow	5.55e-17	3.48588e-15
Ehd2	5.55e-17	3.48588e-15
C5ar1	5.55e-17	3.48588e-15
Ap2s1	5.55e-17	3.48588e-15
Vasp	5.55e-17	3.48588e-15
Ckm	5.55e-17	3.48588e-15
Apoe	5.55e-17	3.48588e-15
Plaur	5.55e-17	3.48588e-15
Rps19	5.55e-17	3.48588e-15
Tgfb1	5.55e-17	3.48588e-15
Axl	5.55e-17	3.48588e-15
Blvrb	5.55e-17	3.48588e-15
Pld3	5.55e-17	3.48588e-15
Rps16	5.55e-17	3.48588e-15
Ech1	5.55e-17	3.48588e-15
Actn4	5.55e-17	3.48588e-15
Psmd8	5.55e-17	3.48588e-15
2200002D01Rik	5.55e-17	3.48588e-15
Cox7a1	5.55e-17	3.48588e-15
Capns1	5.55e-17	3.48588e-15
Tyrobp	5.55e-17	3.48588e-15
Fxyd5	5.55e-17	3.48588e-15
Gramd1a	5.55e-17	3.48588e-15
Etfb	5.55e-17	3.48588e-15
Rcn3	5.55e-17	3.48588e-15
Rps11	5.55e-17	3.48588e-15
Rpl13a	5.55e-17	3.48588e-15
Hrc	5.55e-17	3.48588e-15
Ftl1	5.55e-17	3.48588e-15
Bax	5.55e-17	3.48588e-15
Rpl18	5.55e-17	3.48588e-15
Emp3	5.55e-17	3.48588e-15
Ldha	5.55e-17	3.48588e-15
Mfge8	5.55e-17	3.48588e-15
Idh2	5.55e-17	3.48588e-15
Iqgap1	5.55e-17	3.48588e-15
Sec11a	5.55e-17	3.48588e-15
Ctsc	5.55e-17	3.48588e-15
Prss23	5.55e-17	3.48588e-15
Picalm	5.55e-17	3.48588e-15
Serpinh1	5.55e-17	3.48588e-15
Rps3	5.55e-17	3.48588e-15
Ucp2	5.55e-17	3.48588e-15
P2ry6	5.55e-17	3.48588e-15
Rhog	5.55e-17	3.48588e-15
Hbb-bt	5.55e-17	3.48588e-15
Hbb-bs	5.55e-17	3.48588e-15
Trim30a	5.55e-17	3.48588e-15
Cavin3	5.55e-17	3.48588e-15
Timm10b	5.55e-17	3.48588e-15
Ilk	5.55e-17	3.48588e-15
Rpl27a	5.55e-17	3.48588e-15
Rps13	5.55e-17	3.48588e-15
Rps15a	5.55e-17	3.48588e-15
Arl6ip1	5.55e-17	3.48588e-15
Itpripl2	5.55e-17	3.48588e-15
Uqcrc2	5.55e-17	3.48588e-15
Ndufab1	5.55e-17	3.48588e-15
Il4ra	5.55e-17	3.48588e-15
Nupr1	5.55e-17	3.48588e-15
Bola2	5.55e-17	3.48588e-15
Coro1a	5.55e-17	3.48588e-15
Cdipt	5.55e-17	3.48588e-15
Mvp	5.55e-17	3.48588e-15
Vkorc1	5.55e-17	3.48588e-15
Cox6a2	5.55e-17	3.48588e-15
Mki67	5.55e-17	3.48588e-15
Adam8	5.55e-17	3.48588e-15
Cox8b	5.55e-17	3.48588e-15
Ifitm2	5.55e-17	3.48588e-15
Ifitm3	5.55e-17	3.48588e-15
Rnh1	5.55e-17	3.48588e-15
Irf7	5.55e-17	3.48588e-15
Taldo1	5.55e-17	3.48588e-15
Tspan4	5.55e-17	3.48588e-15
Ap2a2	5.55e-17	3.48588e-15
Ctsd	5.55e-17	3.48588e-15
Lsp1	5.55e-17	3.48588e-15
H19	5.55e-17	3.48588e-15
Cd81	5.55e-17	3.48588e-15
Cttn	5.55e-17	3.48588e-15
Col4a1	5.55e-17	3.48588e-15
Col4a2	5.55e-17	3.48588e-15
Lamp1	5.55e-17	3.48588e-15
Myom2	5.55e-17	3.48588e-15
Ikbkb	5.55e-17	3.48588e-15
Sfrp1	5.55e-17	3.48588e-15
Adam9	5.55e-17	3.48588e-15
Star	5.55e-17	3.48588e-15
Msr1	5.55e-17	3.48588e-15
Asah1	5.55e-17	3.48588e-15
Slc25a4	5.55e-17	3.48588e-15
Acsl1	5.55e-17	3.48588e-15
Spcs3	5.55e-17	3.48588e-15
Hmgb2	5.55e-17	3.48588e-15
Lpl	5.55e-17	3.48588e-15
Ndufa13	5.55e-17	3.48588e-15
Cope	5.55e-17	3.48588e-15
Crlf1	5.55e-17	3.48588e-15
Gdf15	5.55e-17	3.48588e-15
Ifi30	5.55e-17	3.48588e-15
Rpl18a	5.55e-17	3.48588e-15
Myo9b	5.55e-17	3.48588e-15
Plvap	5.55e-17	3.48588e-15
Bst2	5.55e-17	3.48588e-15
Colgalt1	5.55e-17	3.48588e-15
Tpm4	5.55e-17	3.48588e-15
Hmox1	5.55e-17	3.48588e-15
Calr	5.55e-17	3.48588e-15
Junb	5.55e-17	3.48588e-15
Man2b1	5.55e-17	3.48588e-15
Adcy7	5.55e-17	3.48588e-15
Mmp2	5.55e-17	3.48588e-15
Ces1d	5.55e-17	3.48588e-15
Mt2	5.55e-17	3.48588e-15
Mt1	5.55e-17	3.48588e-15
Cdh5	5.55e-17	3.48588e-15
Cmtm3	5.55e-17	3.48588e-15
Cotl1	5.55e-17	3.48588e-15
Cox4i1	5.55e-17	3.48588e-15
Cyba	5.55e-17	3.48588e-15
Aprt	5.55e-17	3.48588e-15
Rpl13	5.55e-17	3.48588e-15
Tcf25	5.55e-17	3.48588e-15
Acta1	5.55e-17	3.48588e-15
Itgb1	5.55e-17	3.48588e-15
Col5a3	5.55e-17	3.48588e-15
Stt3a	5.55e-17	3.48588e-15
Hspa8	5.55e-17	3.48588e-15
Thy1	5.55e-17	3.48588e-15
Mcam	5.55e-17	3.48588e-15
Rps25	5.55e-17	3.48588e-15
Atp5l	5.55e-17	3.48588e-15
Tagln	5.55e-17	3.48588e-15
Rexo2	5.55e-17	3.48588e-15
Sdhd	5.55e-17	3.48588e-15
Cryab	5.55e-17	3.48588e-15
Acat1	5.55e-17	3.48588e-15
Idh3a	5.55e-17	3.48588e-15
Etfa	5.55e-17	3.48588e-15
Cox5a	5.55e-17	3.48588e-15
Csk	5.55e-17	3.48588e-15
Loxl1	5.55e-17	3.48588e-15
Hexa	5.55e-17	3.48588e-15
Pkm	5.55e-17	3.48588e-15
Rplp1	5.55e-17	3.48588e-15
Rpl4	5.55e-17	3.48588e-15
Cilp	5.55e-17	3.48588e-15
Plekho2	5.55e-17	3.48588e-15
Ppib	5.55e-17	3.48588e-15
Rps27l	5.55e-17	3.48588e-15
Tpm1	5.55e-17	3.48588e-15
Anxa2	5.55e-17	3.48588e-15
Adam10	5.55e-17	3.48588e-15
Aldh1a2	5.55e-17	3.48588e-15
Myo5a	5.55e-17	3.48588e-15
Eef1a1	5.55e-17	3.48588e-15
Col12a1	5.55e-17	3.48588e-15
Cox7a2	5.55e-17	3.48588e-15
Tmed3	5.55e-17	3.48588e-15
Ctsh	5.55e-17	3.48588e-15
Atp1b3	5.55e-17	3.48588e-15
Rbp1	5.55e-17	3.48588e-15
Rpl29	5.55e-17	3.48588e-15
Manf	5.55e-17	3.48588e-15
Gnai2	5.55e-17	3.48588e-15
Gpx1	5.55e-17	3.48588e-15
Uqcrc1	5.55e-17	3.48588e-15
Shisa5	5.55e-17	3.48588e-15
Myl3	5.55e-17	3.48588e-15
Crtap	5.55e-17	3.48588e-15
Cmtm7	5.55e-17	3.48588e-15
Rpsa	5.55e-17	3.48588e-15
Rpl14	5.55e-17	3.48588e-15
Ctnnb1	5.55e-17	3.48588e-15
Lars2	5.55e-17	3.48588e-15
Txlnb	5.55e-17	3.48588e-15
Rps12	5.55e-17	3.48588e-15
Ccn2	5.55e-17	3.48588e-15
Enpp1	5.55e-17	3.48588e-15
Epb41l2	5.55e-17	3.48588e-15
Marcks	5.55e-17	3.48588e-15
Lama4	5.55e-17	3.48588e-15
Lilr4b	5.55e-17	3.48588e-15
Lilrb4a	5.55e-17	3.48588e-15
Pln	5.55e-17	3.48588e-15
Psap	5.55e-17	3.48588e-15
Sgpl1	5.55e-17	3.48588e-15
Cdk1	5.55e-17	3.48588e-15
Mif	5.55e-17	3.48588e-15
Chchd10	5.55e-17	3.48588e-15
Col6a2	5.55e-17	3.48588e-15
Col6a1	5.55e-17	3.48588e-15
Col18a1	5.55e-17	3.48588e-15
Itgb2	5.55e-17	3.48588e-15
Cstb	5.55e-17	3.48588e-15
Ptbp1	5.55e-17	3.48588e-15
Cnn2	5.55e-17	3.48588e-15
Arhgap45	5.55e-17	3.48588e-15
Sbno2	5.55e-17	3.48588e-15
Rps15	5.55e-17	3.48588e-15
Uqcr11	5.55e-17	3.48588e-15
Ap3d1	5.55e-17	3.48588e-15
Eef2	5.55e-17	3.48588e-15
Nmrk2	5.55e-17	3.48588e-15
Txnrd1	5.55e-17	3.48588e-15
Ckap4	5.55e-17	3.48588e-15
Hsp90b1	5.55e-17	3.48588e-15
Igf1	5.55e-17	3.48588e-15
Slc25a3	5.55e-17	3.48588e-15
Dcn	5.55e-17	3.48588e-15
Lum	5.55e-17	3.48588e-15
Csrp2	5.55e-17	3.48588e-15
Nap1l1	5.55e-17	3.48588e-15
Lyz2	5.55e-17	3.48588e-15
Rap1b	5.55e-17	3.48588e-15
Cdk4	5.55e-17	3.48588e-15
Lrp1	5.55e-17	3.48588e-15
Atp5b	5.55e-17	3.48588e-15
Myl6	5.55e-17	3.48588e-15
Esyt1	5.55e-17	3.48588e-15
Rpl41	5.55e-17	3.48588e-15
Rps26	5.55e-17	3.48588e-15
Cd63	5.55e-17	3.48588e-15
Itga7	5.55e-17	3.48588e-15
Uqcr10	5.55e-17	3.48588e-15
Ewsr1	5.55e-17	3.48588e-15
Aebp1	5.55e-17	3.48588e-15
Ogdh	5.55e-17	3.48588e-15
Ppia	5.55e-17	3.48588e-15
Igfbp3	5.55e-17	3.48588e-15
Sec61g	5.55e-17	3.48588e-15
Actr2	5.55e-17	3.48588e-15
Mdh1	5.55e-17	3.48588e-15
Rps27a	5.55e-17	3.48588e-15
Rtn4	5.55e-17	3.48588e-15
Hba-a1	5.55e-17	3.48588e-15
Hba-a2	5.55e-17	3.48588e-15
Sh3pxd2b	5.55e-17	3.48588e-15
Npm1	5.55e-17	3.48588e-15
Adam19	5.55e-17	3.48588e-15
Rack1	5.55e-17	3.48588e-15
Sqstm1	5.55e-17	3.48588e-15
Adamts2	5.55e-17	3.48588e-15
Hnrnpab	5.55e-17	3.48588e-15
Nhp2	5.55e-17	3.48588e-15
Uqcrq	5.55e-17	3.48588e-15
Hint1	5.55e-17	3.48588e-15
Gpx3	5.55e-17	3.48588e-15
Sparc	5.55e-17	3.48588e-15
Atox1	5.55e-17	3.48588e-15
Mfap4	5.55e-17	3.48588e-15
Ubb	5.55e-17	3.48588e-15
2410006H16Rik	5.55e-17	3.48588e-15
Rpl26	5.55e-17	3.48588e-15
Efnb3	5.55e-17	3.48588e-15
Cd68	5.55e-17	3.48588e-15
Eif4a1	5.55e-17	3.48588e-15
Eif5a	5.55e-17	3.48588e-15
Slc2a4	5.55e-17	3.48588e-15
Gabarap	5.55e-17	3.48588e-15
Acadvl	5.55e-17	3.48588e-15
Arrb2	5.55e-17	3.48588e-15
Cxcl16	5.55e-17	3.48588e-15
Pfn1	5.55e-17	3.48588e-15
Eno3	5.55e-17	3.48588e-15
Serpinf1	5.55e-17	3.48588e-15
Pitpna	5.55e-17	3.48588e-15
Myo1c	5.55e-17	3.48588e-15
Rpl23a	5.55e-17	3.48588e-15
Lgals9	5.55e-17	3.48588e-15
Ccl2	5.55e-17	3.48588e-15
Ccl7	5.55e-17	3.48588e-15
Ccl12	5.55e-17	3.48588e-15
Ccl8	5.55e-17	3.48588e-15
Ccl9	5.55e-17	3.48588e-15
Ccl6	5.55e-17	3.48588e-15
Wfdc17	5.55e-17	3.48588e-15
Vmp1	5.55e-17	3.48588e-15
Cltc	5.55e-17	3.48588e-15
Nme1	5.55e-17	3.48588e-15
Lrrc59	5.55e-17	3.48588e-15
Col1a1	5.55e-17	3.48588e-15
Atp5g1	5.55e-17	3.48588e-15
Rpl23	5.55e-17	3.48588e-15
Lasp1	5.55e-17	3.48588e-15
Rpl19	5.55e-17	3.48588e-15
Tcap	5.55e-17	3.48588e-15
Igfbp4	5.55e-17	3.48588e-15
Fkbp10	5.55e-17	3.48588e-15
Rab5c	5.55e-17	3.48588e-15
Stat3	5.55e-17	3.48588e-15
Cavin1	5.55e-17	3.48588e-15
Rpl27	5.55e-17	3.48588e-15
Vat1	5.55e-17	3.48588e-15
Tmem106a	5.55e-17	3.48588e-15
Meox1	5.55e-17	3.48588e-15
Grn	5.55e-17	3.48588e-15
Mrc2	5.55e-17	3.48588e-15
Ddx5	5.55e-17	3.48588e-15
Prkar1a	5.55e-17	3.48588e-15
Rpl38	5.55e-17	3.48588e-15
Cd300c2	5.55e-17	3.48588e-15
Atp5h	5.55e-17	3.48588e-15
Jpt1	5.55e-17	3.48588e-15
H3f3b	5.55e-17	3.48588e-15
Trim47	5.55e-17	3.48588e-15
Mxra7	5.55e-17	3.48588e-15
Srsf2	5.55e-17	3.48588e-15
Sept9	5.55e-17	3.48588e-15
Birc5	5.55e-17	3.48588e-15
Timp2	5.55e-17	3.48588e-15
Lgals3bp	5.55e-17	3.48588e-15
Rnf213	5.55e-17	3.48588e-15
Slc38a10	5.55e-17	3.48588e-15
Actg1	5.55e-17	3.48588e-15
P4hb	5.55e-17	3.48588e-15
Arhgdia	5.55e-17	3.48588e-15
Aspscr1	5.55e-17	3.48588e-15
Metrnl	5.55e-17	3.48588e-15
Sdc1	5.55e-17	3.48588e-15
Pdia6	5.55e-17	3.48588e-15
Odc1	5.55e-17	3.48588e-15
Ywhaq	5.55e-17	3.48588e-15
Rsad2	5.55e-17	3.48588e-15
Rps7	5.55e-17	3.48588e-15
Pxdn	5.55e-17	3.48588e-15
Lamb1	5.55e-17	3.48588e-15
Rps29	5.55e-17	3.48588e-15
Rpl36al	5.55e-17	3.48588e-15
Hif1a	5.55e-17	3.48588e-15
Actn1	5.55e-17	3.48588e-15
Npc2	5.55e-17	3.48588e-15
Ltbp2	5.55e-17	3.48588e-15
Pgf	5.55e-17	3.48588e-15
Tgfb3	5.55e-17	3.48588e-15
Calm1	5.55e-17	3.48588e-15
Ndufb1-ps	5.55e-17	3.48588e-15
Lgmn	5.55e-17	3.48588e-15
Ifi27l2a	5.55e-17	3.48588e-15
Serpina3n	5.55e-17	3.48588e-15
Meg3	5.55e-17	3.48588e-15
Dync1h1	5.55e-17	3.48588e-15
Hsp90aa1	5.55e-17	3.48588e-15
Ckb	5.55e-17	3.48588e-15
Atp5mpl	5.55e-17	3.48588e-15
Pld4	5.55e-17	3.48588e-15
Ahnak2	5.55e-17	3.48588e-15
Crip1	5.55e-17	3.48588e-15
Gdi2	5.55e-17	3.48588e-15
Pfkp	5.55e-17	3.48588e-15
Nid1	5.55e-17	3.48588e-15
BC005537	5.55e-17	3.48588e-15
Uqcrfs1	5.55e-17	3.48588e-15
Serpinb1a	5.55e-17	3.48588e-15
Serpinb6a	5.55e-17	3.48588e-15
Tubb2a	5.55e-17	3.48588e-15
Ssr1	5.55e-17	3.48588e-15
Txndc5	5.55e-17	3.48588e-15
Aspn	5.55e-17	3.48588e-15
Gadd45g	5.55e-17	3.48588e-15
Prelid1	5.55e-17	3.48588e-15
Dbn1	5.55e-17	3.48588e-15
Pdlim7	5.55e-17	3.48588e-15
Tmed9	5.55e-17	3.48588e-15
Tgfbi	5.55e-17	3.48588e-15
Hnrnpk	5.55e-17	3.48588e-15
Ctla2a	5.55e-17	3.48588e-15
Aopep	5.55e-17	3.48588e-15
Ctsl	5.55e-17	3.48588e-15
Uqcrb	5.55e-17	3.48588e-15
Ndufs6	5.55e-17	3.48588e-15
Sdha	5.55e-17	3.48588e-15
Ftl1-ps1	5.55e-17	3.48588e-15
Cox7c	5.55e-17	3.48588e-15
Vcan	5.55e-17	3.48588e-15
Tmem167	5.55e-17	3.48588e-15
Rps23	5.55e-17	3.48588e-15
Ckmt2	5.55e-17	3.48588e-15
Cmya5	5.55e-17	3.48588e-15
Hexb	5.55e-17	3.48588e-15
Btf3	5.55e-17	3.48588e-15
Gpx8	5.55e-17	3.48588e-15
Flnb	5.55e-17	3.48588e-15
Rpl15	5.55e-17	3.48588e-15
Anxa7	5.55e-17	3.48588e-15
Rps24	5.55e-17	3.48588e-15
Arf4	5.55e-17	3.48588e-15
Tkt	5.55e-17	3.48588e-15
Stab1	5.55e-17	3.48588e-15
Nisch	5.55e-17	3.48588e-15
Tnnc1	5.55e-17	3.48588e-15
Ldb3	5.55e-17	3.48588e-15
Lgals3	5.55e-17	3.48588e-15
Pnp	5.55e-17	3.48588e-15
Rnase4	5.55e-17	3.48588e-15
Arhgef40	5.55e-17	3.48588e-15
Dad1	5.55e-17	3.48588e-15
Mrpl52	5.55e-17	3.48588e-15
Myh6	5.55e-17	3.48588e-15
Myh7	5.55e-17	3.48588e-15
Ctsb	5.55e-17	3.48588e-15
Clu	5.55e-17	3.48588e-15
Loxl2	5.55e-17	3.48588e-15
Bmp1	5.55e-17	3.48588e-15
Itm2b	5.55e-17	3.48588e-15
Esd	5.55e-17	3.48588e-15
Lcp1	5.55e-17	3.48588e-15
Tpt1	5.55e-17	3.48588e-15
Selenop	5.55e-17	3.48588e-15
Oxct1	5.55e-17	3.48588e-15
Rpl37	5.55e-17	3.48588e-15
Dab2	5.55e-17	3.48588e-15
Dap	5.55e-17	3.48588e-15
Snhg18	5.55e-17	3.48588e-15
Rpl30	5.55e-17	3.48588e-15
Cox6c	5.55e-17	3.48588e-15
Pabpc1	5.55e-17	3.48588e-15
Ywhaz	5.55e-17	3.48588e-15
Cthrc1	5.55e-17	3.48588e-15
Col14a1	5.55e-17	3.48588e-15
Ndufb9	5.55e-17	3.48588e-15
Ly6e	5.55e-17	3.48588e-15
Ly6a	5.55e-17	3.48588e-15
Plec	5.55e-17	3.48588e-15
Rpl8	5.55e-17	3.48588e-15
Mb	5.55e-17	3.48588e-15
Myh9	5.55e-17	3.48588e-15
Kctd17	5.55e-17	3.48588e-15
C1qtnf6	5.55e-17	3.48588e-15
Rac2	5.55e-17	3.48588e-15
Cyth4	5.55e-17	3.48588e-15
Lgals1	5.55e-17	3.48588e-15
Kdelr3	5.55e-17	3.48588e-15
Ddx17	5.55e-17	3.48588e-15
Rpl3	5.55e-17	3.48588e-15
Atf4	5.55e-17	3.48588e-15
Rangap1	5.55e-17	3.48588e-15
Aco2	5.55e-17	3.48588e-15
Ndufa6	5.55e-17	3.48588e-15
Cyb5r3	5.55e-17	3.48588e-15
Tspo	5.55e-17	3.48588e-15
Fbln1	5.55e-17	3.48588e-15
Atxn10	5.55e-17	3.48588e-15
Creld2	5.55e-17	3.48588e-15
Pfkm	5.55e-17	3.48588e-15
Fkbp11	5.55e-17	3.48588e-15
Tuba1b	5.55e-17	3.48588e-15
Tuba1a	5.55e-17	3.48588e-15
Tuba1c	5.55e-17	3.48588e-15
Fmnl3	5.55e-17	3.48588e-15
Copz1	5.55e-17	3.48588e-15
Itga5	5.55e-17	3.48588e-15
Nckap1l	5.55e-17	3.48588e-15
Carhsp1	5.55e-17	3.48588e-15
Litaf	5.55e-17	3.48588e-15
Cebpd	5.55e-17	3.48588e-15
Scarf2	5.55e-17	3.48588e-15
Ranbp1	5.55e-17	3.48588e-15
Ap2m1	5.55e-17	3.48588e-15
Nrros	5.55e-17	3.48588e-15
Rpl35a	5.55e-17	3.48588e-15
Heg1	5.55e-17	3.48588e-15
Itgb5	5.55e-17	3.48588e-15
Hcls1	5.55e-17	3.48588e-15
Ndufb4	5.55e-17	3.48588e-15
Fstl1	5.55e-17	3.48588e-15
Tmem39a	5.55e-17	3.48588e-15
Ccdc80	5.55e-17	3.48588e-15
Rpl24	5.55e-17	3.48588e-15
Col8a1	5.55e-17	3.48588e-15
Dcbld2	5.55e-17	3.48588e-15
Atp5j	5.55e-17	3.48588e-15
App	5.55e-17	3.48588e-15
Adamts1	5.55e-17	3.48588e-15
Atp5o	5.55e-17	3.48588e-15
Rcan1	5.55e-17	3.48588e-15
Hmgn1	5.55e-17	3.48588e-15
Fndc1	5.55e-17	3.48588e-15
Sod2	5.55e-17	3.48588e-15
Thbs2	5.55e-17	3.48588e-15
Tnfrsf12a	5.55e-17	3.48588e-15
Atp6v0c	5.55e-17	3.48588e-15
Eci1	5.55e-17	3.48588e-15
Pkd1	5.55e-17	3.48588e-15
Rps2	5.55e-17	3.48588e-15
Ndufb10	5.55e-17	3.48588e-15
Rpl3l	5.55e-17	3.48588e-15
Atp6v0e	5.55e-17	3.48588e-15
Rps10	5.55e-17	3.48588e-15
Rpl10a	5.55e-17	3.48588e-15
Srsf3	5.55e-17	3.48588e-15
Cdkn1a	5.55e-17	3.48588e-15
Pi16	5.55e-17	3.48588e-15
Mtch1	5.55e-17	3.48588e-15
Ndufv3	5.55e-17	3.48588e-15
Adamts10	5.55e-17	3.48588e-15
Myo1f	5.55e-17	3.48588e-15
Angptl4	5.55e-17	3.48588e-15
Rps28	5.55e-17	3.48588e-15
Tapbp	5.55e-17	3.48588e-15
Rps18	5.55e-17	3.48588e-15
H2-K1	5.55e-17	3.48588e-15
Slc39a7	5.55e-17	3.48588e-15
H2-Ab1	5.55e-17	3.48588e-15
H2-Aa	5.55e-17	3.48588e-15
H2-Eb1	5.55e-17	3.48588e-15
Notch4	5.55e-17	3.48588e-15
1110038B12Rik	5.55e-17	3.48588e-15
Clic1	5.55e-17	3.48588e-15
Aif1	5.55e-17	3.48588e-15
Lst1	5.55e-17	3.48588e-15
H2-D1	5.55e-17	3.48588e-15
Ier3	5.55e-17	3.48588e-15
Tubb5	5.55e-17	3.48588e-15
Ppp1r18	5.55e-17	3.48588e-15
Gm42418	5.55e-17	3.48588e-15
Pla2g7	5.55e-17	3.48588e-15
Hsp90ab1	5.55e-17	3.48588e-15
Trem2	5.55e-17	3.48588e-15
Mydgf	5.55e-17	3.48588e-15
C3	5.55e-17	3.48588e-15
Adgre1	5.55e-17	3.48588e-15
Man2a1	5.55e-17	3.48588e-15
Ndufv2	5.55e-17	3.48588e-15
Myl12b	5.55e-17	3.48588e-15
Srsf7	5.55e-17	3.48588e-15
Zfp36l2	5.55e-17	3.48588e-15
Calm2	5.55e-17	3.48588e-15
Snrpd1	5.55e-17	3.48588e-15
Ecscr	5.55e-17	3.48588e-15
Dpysl3	5.55e-17	3.48588e-15
Eif1a	5.55e-17	3.48588e-15
Lox	5.55e-17	3.48588e-15
Ppic	5.55e-17	3.48588e-15
Synpo	5.55e-17	3.48588e-15
Rps14	5.55e-17	3.48588e-15
Cd74	5.55e-17	3.48588e-15
Csf1r	5.55e-17	3.48588e-15
Tubb6	5.55e-17	3.48588e-15
Acaa2	5.55e-17	3.48588e-15
Rpl17	5.55e-17	3.48588e-15
Atp5a1	5.55e-17	3.48588e-15
Cndp2	5.55e-17	3.48588e-15
Tcirg1	5.55e-17	3.48588e-15
Unc93b1	5.55e-17	3.48588e-15
Ppp1ca	5.55e-17	3.48588e-15
Cd248	5.55e-17	3.48588e-15
Efemp2	5.55e-17	3.48588e-15
Cfl1	5.55e-17	3.48588e-15
Ltbp3	5.55e-17	3.48588e-15
Neat1	5.55e-17	3.48588e-15
Fau	5.55e-17	3.48588e-15
Ppp1r14b	5.55e-17	3.48588e-15
Fermt3	5.55e-17	3.48588e-15
Cox8a	5.55e-17	3.48588e-15
Slc3a2	5.55e-17	3.48588e-15
Eef1g	5.55e-17	3.48588e-15
Fth1	5.55e-17	3.48588e-15
Fads3	5.55e-17	3.48588e-15
Ddb1	5.55e-17	3.48588e-15
Ms4a7	5.55e-17	3.48588e-15
Ms4a6c	5.55e-17	3.48588e-15
Ms4a6b	5.55e-17	3.48588e-15
Ms4a6d	5.55e-17	3.48588e-15
Mpeg1	5.55e-17	3.48588e-15
Anxa1	5.55e-17	3.48588e-15
Gda	5.55e-17	3.48588e-15
Il33	5.55e-17	3.48588e-15
Acta2	5.55e-17	3.48588e-15
Lipa	5.55e-17	3.48588e-15
Ifit3	5.55e-17	3.48588e-15
Ankrd1	5.55e-17	3.48588e-15
Tm9sf3	5.55e-17	3.48588e-15
Pgam1	5.55e-17	3.48588e-15
Got1	5.55e-17	3.48588e-15
Scd2	5.55e-17	3.48588e-15
Ndufb8	5.55e-17	3.48588e-15
Kcnip2	5.55e-17	3.48588e-15
Atp5md	5.55e-17	3.48588e-15
Csf2ra	5.55e-17	3.48588e-15
Rbm3	5.55e-17	3.48588e-15
Cybb	5.55e-17	3.48588e-15
Atp6ap2	5.55e-17	3.48588e-15
Ndufb11	5.55e-17	3.48588e-15
Timp1	5.55e-17	3.48588e-15
Cfp	5.55e-17	3.48588e-15
Rpl39	5.55e-17	3.48588e-15
Ndufa1	5.55e-17	3.48588e-15
Lamp2	5.55e-17	3.48588e-15
Apln	5.55e-17	3.48588e-15
Fhl1	5.55e-17	3.48588e-15
Bgn	5.55e-17	3.48588e-15
Ssr4	5.55e-17	3.48588e-15
Flna	5.55e-17	3.48588e-15
Rpl10	5.55e-17	3.48588e-15
Maged1	5.55e-17	3.48588e-15
Msn	5.55e-17	3.48588e-15
Rps4x	5.55e-17	3.48588e-15
Xist	5.55e-17	3.48588e-15
Cox7b	5.55e-17	3.48588e-15
Pgk1	5.55e-17	3.48588e-15
Sh3bgrl	5.55e-17	3.48588e-15
Rpl36a	5.55e-17	3.48588e-15
Armcx2	5.55e-17	3.48588e-15
Tceal9	5.55e-17	3.48588e-15
Morf4l2	5.55e-17	3.48588e-15
Maged2	5.55e-17	3.48588e-15
Sat1	5.55e-17	3.48588e-15
Prdx4	5.55e-17	3.48588e-15
Tmsb4x	5.55e-17	3.48588e-15
Gm47283	5.55e-17	3.48588e-15
mt-Atp8	5.55e-17	3.48588e-15
mt-Atp6	5.55e-17	3.48588e-15
mt-Nd4l	5.55e-17	3.48588e-15
mt-Nd5	5.55e-17	3.48588e-15
AC149090.1	5.55e-17	3.48588e-15
Eif4e2	1.11022e-16	6.46554e-15
Igsf8	1.11022e-16	6.46554e-15
Fh1	1.11022e-16	6.46554e-15
Nop56	1.11022e-16	6.46554e-15
Prnp	1.11022e-16	6.46554e-15
Zfas1	1.11022e-16	6.46554e-15
Ptpn1	1.11022e-16	6.46554e-15
Eef1a2	1.11022e-16	6.46554e-15
Mlf1	1.11022e-16	6.46554e-15
Mfsd1	1.11022e-16	6.46554e-15
Rps27	1.11022e-16	6.46554e-15
S100a16	1.11022e-16	6.46554e-15
Atp1a1	1.11022e-16	6.46554e-15
Gclm	1.11022e-16	6.46554e-15
Sec24d	1.11022e-16	6.46554e-15
Nans	1.11022e-16	6.46554e-15
Ptbp3	1.11022e-16	6.46554e-15
Plod1	1.11022e-16	6.46554e-15
Nos3	1.11022e-16	6.46554e-15
Yipf7	1.11022e-16	6.46554e-15
Selplg	1.11022e-16	6.46554e-15
Capza2	1.11022e-16	6.46554e-15
Snd1	1.11022e-16	6.46554e-15
Mob1a	1.11022e-16	6.46554e-15
Cox6b1	1.11022e-16	6.46554e-15
Csrp3	1.11022e-16	6.46554e-15
Tgfb1i1	1.11022e-16	6.46554e-15
Fgfr1	1.11022e-16	6.46554e-15
Jund	1.11022e-16	6.46554e-15
Trir	1.11022e-16	6.46554e-15
Tmem208	1.11022e-16	6.46554e-15
Ppan	1.11022e-16	6.46554e-15
Commd4	1.11022e-16	6.46554e-15
Bnip2	1.11022e-16	6.46554e-15
Rhoa	1.11022e-16	6.46554e-15
Scn5a	1.11022e-16	6.46554e-15
Fuca2	1.11022e-16	6.46554e-15
Vsir	1.11022e-16	6.46554e-15
Srgn	1.11022e-16	6.46554e-15
Btg1	1.11022e-16	6.46554e-15
Dctn2	1.11022e-16	6.46554e-15
Tns3	1.11022e-16	6.46554e-15
Gm2a	1.11022e-16	6.46554e-15
Polr2a	1.11022e-16	6.46554e-15
Ace	1.11022e-16	6.46554e-15
Limd2	1.11022e-16	6.46554e-15
Socs3	1.11022e-16	6.46554e-15
Id2	1.11022e-16	6.46554e-15
Psma3	1.11022e-16	6.46554e-15
Crip2	1.11022e-16	6.46554e-15
Actn2	1.11022e-16	6.46554e-15
Ninj1	1.11022e-16	6.46554e-15
Map1b	1.11022e-16	6.46554e-15
Prkcd	1.11022e-16	6.46554e-15
Cyc1	1.11022e-16	6.46554e-15
Cerk	1.11022e-16	6.46554e-15
Plxnb2	1.11022e-16	6.46554e-15
Slc48a1	1.11022e-16	6.46554e-15
Phldb2	1.11022e-16	6.46554e-15
Mpc1	1.11022e-16	6.46554e-15
Ddx39b	1.11022e-16	6.46554e-15
Bin1	1.11022e-16	6.46554e-15
Nars	1.11022e-16	6.46554e-15
Snhg1	1.11022e-16	6.46554e-15
Sfxn3	1.11022e-16	6.46554e-15
Praf2	1.11022e-16	6.46554e-15
Pls3	1.11022e-16	6.46554e-15
Srpx2	1.11022e-16	6.46554e-15
mt-Nd1	1.11022e-16	6.46554e-15
mt-Nd2	1.11022e-16	6.46554e-15
mt-Co1	1.11022e-16	6.46554e-15
mt-Co2	1.11022e-16	6.46554e-15
mt-Co3	1.11022e-16	6.46554e-15
mt-Nd3	1.11022e-16	6.46554e-15
mt-Nd4	1.11022e-16	6.46554e-15
mt-Cytb	1.11022e-16	6.46554e-15
Nrp2	2.22045e-16	1.24885e-14
Ndufs2	2.22045e-16	1.24885e-14
Set	2.22045e-16	1.24885e-14
Ywhab	2.22045e-16	1.24885e-14
Fabp4	2.22045e-16	1.24885e-14
Psmd4	2.22045e-16	1.24885e-14
Ube2d3	2.22045e-16	1.24885e-14
Fndc5	2.22045e-16	1.24885e-14
Ski	2.22045e-16	1.24885e-14
Vps29	2.22045e-16	1.24885e-14
Mdh2	2.22045e-16	1.24885e-14
Eif3b	2.22045e-16	1.24885e-14
Rps17	2.22045e-16	1.24885e-14
Rrm1	2.22045e-16	1.24885e-14
Rplp2	2.22045e-16	1.24885e-14
Adgra2	2.22045e-16	1.24885e-14
Got2	2.22045e-16	1.24885e-14
Sema3f	2.22045e-16	1.24885e-14
Ifngr1	2.22045e-16	1.24885e-14
Mrpl42	2.22045e-16	1.24885e-14
Cnpy2	2.22045e-16	1.24885e-14
Pgam2	2.22045e-16	1.24885e-14
Gngt2	2.22045e-16	1.24885e-14
Kpnb1	2.22045e-16	1.24885e-14
Inf2	2.22045e-16	1.24885e-14
Lrtm1	2.22045e-16	1.24885e-14
Phf11d	2.22045e-16	1.24885e-14
Sucla2	2.22045e-16	1.24885e-14
Cd47	2.22045e-16	1.24885e-14
Cct8	2.22045e-16	1.24885e-14
Bak1	2.22045e-16	1.24885e-14
Flot1	2.22045e-16	1.24885e-14
H2-T23	2.22045e-16	1.24885e-14
Ndufv1	2.22045e-16	1.24885e-14
Vegfb	2.22045e-16	1.24885e-14
Elf4	2.22045e-16	1.24885e-14
Il2rg	2.22045e-16	1.24885e-14
Ehbp1l1	3.33067e-16	1.87154e-14
Eif6	4.44089e-16	2.47707e-14
Rab7	4.44089e-16	2.47707e-14
Furin	4.44089e-16	2.47707e-14
Rrad	4.44089e-16	2.47707e-14
Abracl	4.44089e-16	2.47707e-14
Nedd8	4.44089e-16	2.47707e-14
Ube2i	4.44089e-16	2.47707e-14
Rpl36	4.44089e-16	2.47707e-14
Degs1	5.55112e-16	3.07939e-14
Ndufs5	5.55112e-16	3.07939e-14
Rras	5.55112e-16	3.07939e-14
Ppp4c	5.55112e-16	3.07939e-14
Eif3l	5.55112e-16	3.07939e-14
Slc38a2	5.55112e-16	3.07939e-14
Rnpep	6.66134e-16	3.67849e-14
Ost4	6.66134e-16	3.67849e-14
Fam20c	6.66134e-16	3.67849e-14
Naca	6.66134e-16	3.67849e-14
Tmem45a	6.66134e-16	3.67849e-14
Uap1l1	7.77156e-16	4.26446e-14
Ptgds	7.77156e-16	4.26446e-14
Mafb	7.77156e-16	4.26446e-14
Adar	7.77156e-16	4.26446e-14
Nt5c	7.77156e-16	4.26446e-14
Ephx2	7.77156e-16	4.26446e-14
Snhg9	7.77156e-16	4.26446e-14
Mapk3	8.88178e-16	4.85177e-14
Ctdsp2	8.88178e-16	4.85177e-14
Ndrg2	8.88178e-16	4.85177e-14
Prr13	8.88178e-16	4.85177e-14
Myof	8.88178e-16	4.85177e-14
Bzw1	1.11022e-15	6.02681e-14
Ndufs1	1.11022e-15	6.02681e-14
Snhg12	1.11022e-15	6.02681e-14
Fbl	1.11022e-15	6.02681e-14
Nptn	1.11022e-15	6.02681e-14
Myzap	1.11022e-15	6.02681e-14
Copb2	1.11022e-15	6.02681e-14
Wls	1.33227e-15	7.21285e-14
Gns	1.33227e-15	7.21285e-14
Coq10a	1.33227e-15	7.21285e-14
Dlgap4	1.44329e-15	7.78619e-14
Arfgap1	1.44329e-15	7.78619e-14
Fosl2	1.44329e-15	7.78619e-14
Prdx3	1.44329e-15	7.78619e-14
Adamtsl2	1.55431e-15	8.32602e-14
Gorasp2	1.55431e-15	8.32602e-14
Acss1	1.55431e-15	8.32602e-14
Gask1b	1.55431e-15	8.32602e-14
Cers2	1.55431e-15	8.32602e-14
Suclg1	1.55431e-15	8.32602e-14
Ppp1r12c	1.55431e-15	8.32602e-14
Unc5b	1.55431e-15	8.32602e-14
Rgs10	1.66533e-15	8.91288e-14
Scarb2	1.77636e-15	9.49037e-14
Ncf1	1.77636e-15	9.49037e-14
Nsa2	1.88738e-15	1.00747e-13
Selenon	1.9984e-15	1.06393e-13
Bud31	1.9984e-15	1.06393e-13
Pgs1	1.9984e-15	1.06393e-13
Serinc3	2.10942e-15	1.12205e-13
Gnl3	2.22045e-15	1.17904e-13
Plp2	2.22045e-15	1.17904e-13
Rab4b	2.44249e-15	1.29356e-13
Tap1	2.44249e-15	1.29356e-13
Atp6ap1	2.44249e-15	1.29356e-13
Ndufs3	2.66454e-15	1.40993e-13
Fkbp8	2.88658e-15	1.52477e-13
Dnmt1	2.88658e-15	1.52477e-13
Srsf5	2.9976e-15	1.58204e-13
Plekho1	3.33067e-15	1.75629e-13
Ugdh	3.55271e-15	1.87014e-13
Hnrnpm	3.55271e-15	1.87014e-13
Rab6a	3.88578e-15	2.04193e-13
Mcfd2	3.88578e-15	2.04193e-13
Taf10	3.9968e-15	2.09664e-13
Cct5	3.9968e-15	2.09664e-13
Tceal8	4.21885e-15	2.21121e-13
Sh3gl1	4.66294e-15	2.44187e-13
Vars	4.88498e-15	2.55595e-13
Dbnl	5.10703e-15	2.66983e-13
Capzb	5.21805e-15	2.72319e-13
Tmem258	5.21805e-15	2.72319e-13
Arrb1	5.32907e-15	2.77874e-13
Pcna	5.55112e-15	2.89204e-13
Glmp	5.77316e-15	3.00515e-13
Xpnpep1	5.9952e-15	3.11806e-13
Fam114a1	6.21725e-15	3.23078e-13
Srsf11	6.32827e-15	3.28286e-13
Nktr	6.32827e-15	3.28286e-13
Sema7a	6.43929e-15	3.33761e-13
Farp1	6.88338e-15	3.56475e-13
H6pd	7.10543e-15	3.67661e-13
Parva	7.32747e-15	3.78828e-13
Fitm1	7.77156e-15	4.01446e-13
Trim25	7.99361e-15	4.12565e-13
Chpf2	9.32587e-15	4.80918e-13
Tmem234	9.54792e-15	4.91951e-13
Tgfbr2	9.99201e-15	5.14396e-13
Pcdh1	1.11022e-14	5.71068e-13
Park7	1.13243e-14	5.81997e-13
Arhgef1	1.22125e-14	6.27114e-13
Gpi1	1.24345e-14	6.37977e-13
Snhg5	1.28786e-14	6.60205e-13
Arf6	1.33227e-14	6.82395e-13
Pon2	1.35447e-14	6.93184e-13
Cand1	1.42109e-14	7.26664e-13
Gpsm3	1.58762e-14	8.11137e-13
Dhx15	1.59872e-14	8.14756e-13
Dctn5	1.59872e-14	8.14756e-13
Lmf2	1.59872e-14	8.14756e-13
Tmem189	1.67644e-14	8.53646e-13
Cebpb	1.70974e-14	8.69878e-13
Ppfibp1	1.85407e-14	9.4252e-13
Entpd1	1.88738e-14	9.5865e-13
Tmem165	1.9984e-14	1.01419e-12
Ptprn	2.07612e-14	1.05276e-12
Idh3g	2.10942e-14	1.06875e-12
Gpr137b	2.17604e-14	1.10159e-12
Atp5d	2.20934e-14	1.11752e-12
Endod1	2.22045e-14	1.1222e-12
Dnajc3	2.33147e-14	1.17733e-12
Abr	2.42029e-14	1.22117e-12
Wipf1	2.44249e-14	1.23135e-12
Tmem263	2.58682e-14	1.30303e-12
Pomp	2.59792e-14	1.30754e-12
Crk	2.63123e-14	1.32321e-12
Psmc1	2.64233e-14	1.32769e-12
S1pr2	2.75335e-14	1.38233e-12
Nup50	2.94209e-14	1.47587e-12
Eif3d	3.08642e-14	1.547e-12
Crat	3.15303e-14	1.57908e-12
Il6st	3.44169e-14	1.72081e-12
Pigq	3.44169e-14	1.72081e-12
Tspan17	3.58602e-14	1.7915e-12
Tubb4b	3.77476e-14	1.88424e-12
Psmb5	4.13003e-14	2.05989e-12
Xbp1	4.27436e-14	2.13013e-12
Snrpg	4.40759e-14	2.19473e-12
Sept8	4.4853e-14	2.2316e-12
Crlf2	4.54081e-14	2.25737e-12
Fus	4.72955e-14	2.34927e-12
Otub1	4.76286e-14	2.36389e-12
Psmd2	4.84057e-14	2.4005e-12
Cggbp1	4.95159e-14	2.45355e-12
Dazap1	5.05151e-14	2.50103e-12
Tep1	5.22915e-14	2.58687e-12
P2rx4	5.24025e-14	2.58815e-12
Prcp	5.24025e-14	2.58815e-12
Mprip	5.26246e-14	2.59701e-12
Sept7	5.4734e-14	2.69891e-12
S100a13	5.59552e-14	2.7569e-12
Ube2l3	5.72875e-14	2.82025e-12
Map4	5.77316e-14	2.83982e-12
Snx18	5.81757e-14	2.85935e-12
Snrnp70	6.01741e-14	2.95518e-12
Sorbs2	6.07292e-14	2.98003e-12
Myd88	6.27276e-14	3.07562e-12
Map1lc3a	6.32827e-14	3.10033e-12
Twf1	6.52811e-14	3.19566e-12
Sipa1	6.66134e-14	3.25826e-12
Canx	7.26086e-14	3.54865e-12
Slc50a1	7.4607e-14	3.64339e-12
Ifi27	7.66054e-14	3.73797e-12
Medag	7.77156e-14	3.78911e-12
Pmp22	8.37108e-14	4.07814e-12
Atf6b	8.81517e-14	4.29105e-12
Man1b1	9.05942e-14	4.40642e-12
Gadd45b	9.90319e-14	4.81297e-12
Gm10076	9.92539e-14	4.81606e-12
Ndfip1	9.92539e-14	4.81606e-12
Cybc1	1.02363e-13	4.96294e-12
Tuba8	1.03917e-13	5.03428e-12
Srl	1.07137e-13	5.18613e-12
Anp32b	1.11244e-13	5.37641e-12
Ccnd1	1.11244e-13	5.37641e-12
Hnrnpa1	1.14575e-13	5.53298e-12
Atp13a2	1.17462e-13	5.66788e-12
Sfpq	1.18572e-13	5.71691e-12
Bicc1	1.20348e-13	5.79796e-12
Arhgef25	1.20792e-13	5.81475e-12
Eif1	1.25233e-13	6.02376e-12
Yipf5	1.2701e-13	6.10437e-12
Pdlim5	1.28342e-13	6.16353e-12
Trp53i11	1.35003e-13	6.47832e-12
Atp6v1a	1.4011e-13	6.71808e-12
Ube2v1	1.531e-13	7.33513e-12
Rtp4	1.53655e-13	7.35593e-12
Mcrip1	1.56319e-13	7.4776e-12
Elk3	1.56986e-13	7.50356e-12
Acvrl1	1.61648e-13	7.72037e-12
Chsy1	1.8785e-13	8.96471e-12
Ndufs4	1.90292e-13	9.07415e-12
Ap3s1	1.92513e-13	9.17284e-12
Sar1a	1.92957e-13	9.1868e-12
Mbnl1	1.96509e-13	9.34862e-12
Wsb1	2.04392e-13	9.71602e-12
Ppp1r9b	2.15827e-13	1.02516e-11
Ahnak	2.30926e-13	1.09602e-11
Arf5	2.4214e-13	1.14835e-11
Pam	2.50466e-13	1.18691e-11
Fes	2.57572e-13	1.21963e-11
Dusp3	2.75779e-13	1.30381e-11
Zfp36l1	2.75779e-13	1.30381e-11
Uba7	2.79998e-13	1.32273e-11
Znhit1	2.83773e-13	1.33952e-11
Ptprc	2.92655e-13	1.38038e-11
Bcr	2.98872e-13	1.40861e-11
Brd2	3.01092e-13	1.41798e-11
Stat2	3.01537e-13	1.41897e-11
Ptpra	3.16858e-13	1.48991e-11
Scamp2	3.3884e-13	1.59205e-11
Map11	3.55938e-13	1.67109e-11
Ndufa2	3.85025e-13	1.80626e-11
Kctd11	3.88245e-13	1.81996e-11
Selenom	3.89466e-13	1.82427e-11
Hnrnpul2	3.90354e-13	1.82703e-11
Dgat2	4.32321e-13	2.02189e-11
Ubxn4	4.35985e-13	2.03746e-11
Rab1a	4.51639e-13	2.10899e-11
Nucb1	4.60743e-13	2.14985e-11
Stx5a	4.77618e-13	2.22689e-11
Aida	4.96714e-13	2.31415e-11
Tmem173	5.19362e-13	2.41781e-11
Derl1	5.7776e-13	2.68761e-11
Pdhb	6.17617e-13	2.87082e-11
Sae1	6.19282e-13	2.87637e-11
Bhlhe40	6.51479e-13	3.0236e-11
Lgals8	6.65801e-13	3.08771e-11
St6galnac4	6.70908e-13	3.10902e-11
Gng12	7.31193e-13	3.38581e-11
Dnajb6	7.74047e-13	3.58152e-11
Hnrnph1	8.07354e-13	3.73279e-11
Sdhc	8.11351e-13	3.74842e-11
Eng	8.18234e-13	3.77735e-11
Adam17	8.4488e-13	3.8974e-11
Snrpf	8.5576e-13	3.94459e-11
Supt20	8.84848e-13	4.07558e-11
Rgl2	8.89844e-13	4.09549e-11
Ap1b1	9.09717e-13	4.18379e-11
Tmem119	9.16489e-13	4.21175e-11
Spcs1	9.23817e-13	4.24222e-11
Rtraf	1.03906e-12	4.76781e-11
Hip1	1.11178e-12	5.09764e-11
Ykt6	1.14286e-12	5.23623e-11
Gnas	1.18128e-12	5.40815e-11
Scn1b	1.18705e-12	5.43049e-11
Fasn	1.19327e-12	5.45483e-11
Grb14	1.24056e-12	5.66677e-11
Notch3	1.2601e-12	5.75171e-11
Fhod1	1.26343e-12	5.76259e-11
Ergic3	1.27076e-12	5.79166e-11
Ndufa12	1.27187e-12	5.79238e-11
Cap1	1.28209e-12	5.83453e-11
Nckap1	1.28919e-12	5.86247e-11
Fitm2	1.35392e-12	6.15221e-11
Ap2b1	1.35891e-12	6.1703e-11
Gatad2a	1.40465e-12	6.37323e-11
Sidt2	1.42242e-12	6.44902e-11
Samhd1	1.45128e-12	6.57499e-11
Eva1b	1.47626e-12	6.68318e-11
Arap1	1.58606e-12	7.17491e-11
Sf3b3	1.64091e-12	7.4175e-11
Rasa4	1.67311e-12	7.55742e-11
Trf	1.67477e-12	7.55933e-11
Mgat2	1.67744e-12	7.56574e-11
Rassf1	1.70419e-12	7.68072e-11
Esam	1.7063e-12	7.68453e-11
Kctd10	1.7395e-12	7.82823e-11
Gm13889	1.95111e-12	8.77403e-11
Pofut2	1.96199e-12	8.81644e-11
Evl	1.96398e-12	8.8189e-11
Rpl9-ps6	2.06057e-12	9.24579e-11
Gng5	2.08566e-12	9.35147e-11
Mfsd5	2.08877e-12	9.35851e-11
Zfp598	2.17981e-12	9.7592e-11
Dusp11	2.21456e-12	9.90749e-11
Swi5	2.22067e-12	9.9275e-11
Mcm6	2.25797e-12	1.00868e-10
Maf	2.32614e-12	1.03837e-10
Sf1	2.33458e-12	1.04138e-10
Dnajc10	2.42628e-12	1.08149e-10
Psmc4	2.51332e-12	1.11947e-10
5031439G07Rik	2.63367e-12	1.17221e-10
Pold4	2.64178e-12	1.17496e-10
Hnrnpul1	2.78977e-12	1.23987e-10
Dgkz	2.97029e-12	1.31914e-10
Rbms1	3.11751e-12	1.38351e-10
Nid2	3.1275e-12	1.38693e-10
Impdh2	3.18678e-12	1.41219e-10
Btg3	3.27149e-12	1.44867e-10
Zfp36	3.33689e-12	1.47656e-10
Arhgap27	3.46256e-12	1.53105e-10
Rab3il1	3.5969e-12	1.5893e-10
Actr1a	3.63065e-12	1.60304e-10
Vcl	3.69482e-12	1.63019e-10
Lsm7	3.77431e-12	1.66406e-10
Abhd12	3.83893e-12	1.69029e-10
Gas6	3.83937e-12	1.69029e-10
Hmgn2	3.91842e-12	1.72384e-10
Traf7	4.13003e-12	1.81562e-10
Slc1a5	4.1922e-12	1.84163e-10
Gmppa	4.26792e-12	1.87353e-10
Mpp1	4.55136e-12	1.99652e-10
Sf3b5	4.55902e-12	1.99844e-10
Echs1	4.59277e-12	2.01178e-10
Atp9b	4.93228e-12	2.15894e-10
Eif4g1	5.0171e-12	2.19449e-10
Rasip1	5.22293e-12	2.28288e-10
Pygb	5.24381e-12	2.29035e-10
Arf3	5.25613e-12	2.29409e-10
Rab11a	5.33351e-12	2.32619e-10
Grk2	5.36615e-12	2.33875e-10
Nsd2	5.52369e-12	2.40569e-10
Ifi35	5.57143e-12	2.42474e-10
Htra2	5.58709e-12	2.42866e-10
Spryd3	5.58842e-12	2.42866e-10
Ppp1cc	6.03695e-12	2.62171e-10
Ryr2	6.20604e-12	2.69322e-10
Ift20	6.53444e-12	2.83371e-10
Ikbip	7.08944e-12	3.0722e-10
Myl1	7.41296e-12	3.21011e-10
Slc35b1	7.5453e-12	3.26509e-10
Mical2	7.61236e-12	3.29176e-10
Dpt	7.63101e-12	3.29749e-10
Pltp	7.6944e-12	3.32252e-10
Clic4	8.12239e-12	3.50484e-10
Aup1	8.18312e-12	3.52854e-10
Arl8a	8.21665e-12	3.54049e-10
Cnpy3	8.55616e-12	3.68417e-10
Caprin1	9.02356e-12	3.88267e-10
Chpt1	9.33453e-12	4.01364e-10
Ankrd13a	9.44256e-12	4.05722e-10
Dpp3	9.46365e-12	4.06341e-10
Nav1	9.58855e-12	4.11123e-10
Trim28	9.58189e-12	4.11123e-10
Lpp	9.60199e-12	4.11409e-10
Plat	1.02016e-11	4.36793e-10
Rhbdf1	1.02807e-11	4.39868e-10
Fam193b	1.12166e-11	4.79574e-10
Prkcsh	1.14444e-11	4.88971e-10
Tmem43	1.20213e-11	5.13258e-10
Ap1s2	1.22695e-11	5.23489e-10
Ywhag	1.23912e-11	5.2831e-10
Myl12a	1.25098e-11	5.32992e-10
Pros1	1.26423e-11	5.38262e-10
Mcm7	1.28115e-11	5.45085e-10
Nxf1	1.3104e-11	5.57137e-10
Gltp	1.32551e-11	5.63167e-10
Stat1	1.34167e-11	5.69637e-10
Uba5	1.39326e-11	5.91129e-10
Snx1	1.4318e-11	6.07055e-10
Lrg1	1.46101e-11	6.19008e-10
Obscn	1.50058e-11	6.3533e-10
B4galt3	1.63026e-11	6.89757e-10
Ddi2	1.71207e-11	7.23867e-10
Arap3	1.81626e-11	7.67383e-10
Timm13	1.8222e-11	7.69357e-10
Cs	1.88853e-11	7.96812e-10
Rapgef1	1.93363e-11	8.15274e-10
Sdc2	1.97095e-11	8.30431e-10
Vwa5a	1.9732e-11	8.30805e-10
Tmed2	2.03557e-11	8.56473e-10
Psma7	2.09088e-11	8.79137e-10
Stk38	2.10002e-11	8.82369e-10
Dnajc5	2.1562e-11	9.05347e-10
Hnrnpdl	2.18567e-11	9.1709e-10
Syk	2.2105e-11	9.26867e-10
Tax1bp3	2.22276e-11	9.31364e-10
Abca1	2.24984e-11	9.42065e-10
Slc43a2	2.28997e-11	9.58206e-10
Klc1	2.36993e-11	9.90982e-10
Lfng	2.39172e-11	9.99407e-10
Pgls	2.40582e-11	1.00461e-09
Ciao2b	2.4172e-11	1.00867e-09
Cyb561	2.52264e-11	1.05194e-09
Hdac1	2.5512e-11	1.06313e-09
Myadm	2.71758e-11	1.13091e-09
Calm3	2.71727e-11	1.13091e-09
Tlnrd1	2.73204e-11	1.13615e-09
Pecam1	2.76341e-11	1.14841e-09
Selenos	2.79823e-11	1.16208e-09
H2afy	2.84572e-11	1.181e-09
Ascc2	2.88625e-11	1.197e-09
Vwa1	2.99234e-11	1.24015e-09
Tmem63a	3.01847e-11	1.25013e-09
Tm4sf1	3.05398e-11	1.26398e-09
Snrpd3	3.07889e-11	1.27342e-09
Pdxk	3.11852e-11	1.28893e-09
F11r	3.18804e-11	1.31677e-09
Tor2a	3.24618e-11	1.33988e-09
G0s2	3.29594e-11	1.35949e-09
Ptpn12	3.29953e-11	1.36005e-09
Stk19	3.35953e-11	1.38385e-09
Sumo3	3.52511e-11	1.45107e-09
Galnt1	3.58646e-11	1.47532e-09
Ehmt2	3.60317e-11	1.48119e-09
Ptpn23	3.75027e-11	1.54062e-09
Rad23b	3.75857e-11	1.54299e-09
Psmb1	3.79045e-11	1.55502e-09
Snrpb	3.91812e-11	1.60632e-09
Snrpa1	4.06358e-11	1.66483e-09
Tnpo2	4.14866e-11	1.69854e-09
Mlf2	4.26089e-11	1.74332e-09
Piezo1	4.27134e-11	1.74642e-09
Hsd3b7	4.37246e-11	1.78656e-09
Tardbp	4.72243e-11	1.92826e-09
Tbcb	4.81376e-11	1.96423e-09
Tmem120a	4.84475e-11	1.97555e-09
Pigs	4.85825e-11	1.97973e-09
Ist1	4.87022e-11	1.98328e-09
Ndufa10	5.13471e-11	2.08959e-09
Emc1	5.24982e-11	2.135e-09
Tgfbr1	5.33553e-11	2.16841e-09
Uba2	5.49307e-11	2.23094e-09
Srsf1	5.51389e-11	2.2379e-09
Kif5b	5.5282e-11	2.24221e-09
Apobec2	5.89664e-11	2.39006e-09
Olfml2b	6.07926e-11	2.46244e-09
Gnai3	6.32299e-11	2.55945e-09
Eif4ebp1	6.49401e-11	2.62693e-09
Fam214b	6.50725e-11	2.62879e-09
Zpr1	6.50699e-11	2.62879e-09
Ndufb3	6.60609e-11	2.66695e-09
Angpt1	6.7698e-11	2.73122e-09
AI413582	6.79889e-11	2.74115e-09
Asb2	6.80873e-11	2.74329e-09
Lrrc32	6.86542e-11	2.7643e-09
Exoc5	6.93896e-11	2.79206e-09
Mrto4	7.08626e-11	2.84945e-09
Pdcd6ip	7.09705e-11	2.8519e-09
Osmr	7.15819e-11	2.87457e-09
Rnf4	7.25386e-11	2.91106e-09
Amotl1	7.59702e-11	3.04677e-09
Irf9	7.80054e-11	3.12632e-09
Blmh	8.27893e-11	3.31587e-09
Map7d1	8.8201e-11	3.53029e-09
Prrc1	8.88463e-11	3.55378e-09
Arf1	9.12259e-11	3.64657e-09
Snrpe	9.16471e-11	3.65859e-09
Slc37a2	9.15931e-11	3.65859e-09
Gmfb	9.4194e-11	3.7578e-09
Pafah1b2	9.48741e-11	3.78245e-09
Trib1	9.50109e-11	3.78542e-09
Wsb2	9.7359e-11	3.87643e-09
Cxcl14	1.00453e-10	3.99701e-09
Apbb1	1.02815e-10	4.08833e-09
M6pr	1.06818e-10	4.24472e-09
Ppt1	1.08812e-10	4.32112e-09
Sap30bp	1.13767e-10	4.51496e-09
Acot13	1.22447e-10	4.85625e-09
Nt5dc2	1.25009e-10	4.95464e-09
Cygb	1.27007e-10	5.03055e-09
Ptprs	1.28592e-10	5.09002e-09
Uba1	1.28883e-10	5.09819e-09
Usp48	1.31118e-10	5.18322e-09
Col4a5	1.31744e-10	5.20461e-09
Spred1	1.34692e-10	5.31761e-09
Ddx3x	1.36177e-10	5.37273e-09
Ostf1	1.42239e-10	5.60828e-09
Slc25a11	1.42973e-10	5.63358e-09
Parm1	1.44971e-10	5.70861e-09
Bri3	1.48086e-10	5.82747e-09
Azin1	1.48433e-10	5.83734e-09
1700017B05Rik	1.50886e-10	5.92998e-09
Os9	1.51402e-10	5.94642e-09
Oas2	1.59786e-10	6.27164e-09
Gpat4	1.72887e-10	6.78149e-09
Chmp5	1.75002e-10	6.86004e-09
Rasl11b	1.76713e-10	6.92264e-09
Chmp3	1.77331e-10	6.94237e-09
Eef1d	1.77862e-10	6.95867e-09
Ccnl2	1.80646e-10	7.06308e-09
Ndufa8	1.86104e-10	7.27177e-09
Tnfaip2	1.87555e-10	7.32379e-09
Dpm2	1.90504e-10	7.43416e-09
Arl1	1.91866e-10	7.48251e-09
Ehd4	1.94646e-10	7.58606e-09
Grina	1.96881e-10	7.66824e-09
Oaf	1.97385e-10	7.68295e-09
Smpx	2.15915e-10	8.39884e-09
Zc3h7a	2.17398e-10	8.45112e-09
Ifi203	2.2842e-10	8.86822e-09
P4ha2	2.28313e-10	8.86822e-09
Snx2	2.36948e-10	9.19347e-09
Fbrs	2.44427e-10	9.47759e-09
Ptp4a2	2.47036e-10	9.57264e-09
Tars	2.5424e-10	9.84553e-09
Gstk1	2.55896e-10	9.90336e-09
Zeb2	2.6019e-10	1.00631e-08
Fkbp3	2.65233e-10	1.02517e-08
Fam91a1	2.69699e-10	1.04177e-08
Dhrs3	2.70031e-10	1.04238e-08
Nono	2.82845e-10	1.09116e-08
Ier3ip1	2.87136e-10	1.10701e-08
Lman1	3.00626e-10	1.15828e-08
Fam120a	3.03018e-10	1.16676e-08
Mdm2	3.19541e-10	1.2296e-08
Eif2b5	3.22596e-10	1.24057e-08
Anxa6	3.28542e-10	1.26264e-08
Dpysl2	3.32202e-10	1.2759e-08
Tmem132a	3.3625e-10	1.29063e-08
Il13ra1	3.40135e-10	1.30472e-08
Mapk1ip1l	3.5312e-10	1.35368e-08
Nedd4	3.60433e-10	1.38084e-08
Fam104a	3.66786e-10	1.40429e-08
Tex264	3.68395e-10	1.40956e-08
Hgsnat	3.73228e-10	1.42716e-08
Sh3glb1	3.78611e-10	1.44683e-08
Plscr3	3.79057e-10	1.44763e-08
Atp8b2	3.89786e-10	1.48767e-08
Ndufs7	3.97002e-10	1.51426e-08
Syncrip	3.99682e-10	1.52352e-08
Asb11	4.01191e-10	1.52832e-08
Mapre1	4.04232e-10	1.53894e-08
Nol12	4.07909e-10	1.55197e-08
Psmb4	4.11055e-10	1.56296e-08
Psmd13	4.11914e-10	1.56524e-08
Gbf1	4.19903e-10	1.5946e-08
Fyco1	4.31592e-10	1.63797e-08
Armc5	4.80357e-10	1.8219e-08
Gosr2	4.85185e-10	1.83907e-08
B3gat3	4.9243e-10	1.86537e-08
Galk1	4.93535e-10	1.86839e-08
Klf6	5.35506e-10	2.02602e-08
Git2	5.4433e-10	2.05812e-08
Cyfip1	5.4652e-10	2.06512e-08
Mbd3	5.49033e-10	2.07333e-08
Tcea3	5.57589e-10	2.10433e-08
Sdc4	5.59966e-10	2.11199e-08
Ube2z	5.60404e-10	2.11233e-08
Ubr4	5.92583e-10	2.23224e-08
Med15	5.95237e-10	2.24085e-08
Cltb	6.24849e-10	2.35087e-08
Arid1a	6.33549e-10	2.38213e-08
Matn2	6.44312e-10	2.4211e-08
Csnk1d	6.57762e-10	2.47012e-08
Man1c1	6.60722e-10	2.4797e-08
Gtf2f1	6.71915e-10	2.52015e-08
Rnf126	6.76833e-10	2.53703e-08
Aldh6a1	6.83343e-10	2.55985e-08
Slfn2	6.90499e-10	2.58507e-08
Tomm6	6.98309e-10	2.6127e-08
Tmem183a	7.31882e-10	2.73663e-08
Ankrd10	7.40398e-10	2.76677e-08
Ryk	7.64559e-10	2.8553e-08
Atxn7l3	7.67119e-10	2.8631e-08
Amdhd2	7.95266e-10	2.96633e-08
Gfpt1	8.08348e-10	3.01328e-08
Kitl	8.12027e-10	3.02514e-08
Cdv3	8.81604e-10	3.28233e-08
Ppp1r15b	9.20718e-10	3.42586e-08
Mylk	9.45668e-10	3.51654e-08
Vamp3	9.59778e-10	3.56683e-08
Cant1	9.88397e-10	3.67095e-08
Bcap31	1.0319e-09	3.83019e-08
Slc4a2	1.06421e-09	3.94771e-08
Emc8	1.06998e-09	3.96668e-08
Brd8	1.07878e-09	3.99686e-08
Vamp8	1.10579e-09	4.09445e-08
Pa2g4	1.13217e-09	4.18958e-08
Cct6a	1.1413e-09	4.22077e-08
Cd302	1.15114e-09	4.25459e-08
Mcts1	1.17554e-09	4.34212e-08
Cbx3	1.19509e-09	4.41165e-08
Dact3	1.19799e-09	4.41968e-08
Comtd1	1.33968e-09	4.93941e-08
Nfkb2	1.35816e-09	5.00452e-08
Phf23	1.36706e-09	5.03427e-08
Leprot	1.36849e-09	5.03647e-08
Fam168b	1.37262e-09	5.04861e-08
Med21	1.39999e-09	5.14618e-08
Trmt1	1.41025e-09	5.18076e-08
Atl3	1.43547e-09	5.27021e-08
Car14	1.45774e-09	5.34875e-08
Emc10	1.50289e-09	5.51109e-08
Vasn	1.533e-09	5.61811e-08
Dnm2	1.53813e-09	5.63351e-08
Pcbp2	1.54668e-09	5.66144e-08
Slc20a1	1.54938e-09	5.66789e-08
Tpi1	1.56677e-09	5.72807e-08
Cflar	1.6386e-09	5.98706e-08
Ufm1	1.65449e-09	6.04152e-08
Rpl10-ps3	1.74393e-09	6.36427e-08
Gpm6b	1.76807e-09	6.44849e-08
Nxn	1.83103e-09	6.67414e-08
Tcp1	1.86715e-09	6.80172e-08
Cpt1b	1.89686e-09	6.90579e-08
E2f4	1.92745e-09	7.01296e-08
Pip5k1c	1.94359e-09	7.06745e-08
Sertad1	2.04297e-09	7.42438e-08
Ubtf	2.04455e-09	7.42572e-08
Plxna1	2.07027e-09	7.51462e-08
Hsd17b12	2.07695e-09	7.53436e-08
Creg1	2.12757e-09	7.71339e-08
Shroom3	2.16205e-09	7.83373e-08
Ppil2	2.16568e-09	7.8422e-08
Ubl5	2.17849e-09	7.88391e-08
Aplp2	2.21445e-09	8.00929e-08
Slc31a1	2.23831e-09	8.09077e-08
Apeh	2.24869e-09	8.12346e-08
Sumf1	2.25999e-09	8.15941e-08
Fam89b	2.26572e-09	8.17527e-08
Stx7	2.27618e-09	8.20812e-08
N4bp1	2.36544e-09	8.52497e-08
Parp3	2.40605e-09	8.66617e-08
H3f3a	2.44981e-09	8.81855e-08
Tial1	2.54761e-09	9.1652e-08
Rab11fip5	2.60685e-09	9.37274e-08
Nsmf	2.63551e-09	9.47021e-08
Fmc1	2.6511e-09	9.52059e-08
Adhfe1	2.70946e-09	9.72444e-08
Wdr26	2.90379e-09	1.04158e-07
Kdelr1	2.97364e-09	1.066e-07
Rcc2	3.08233e-09	1.10431e-07
Ccdc12	3.13174e-09	1.12135e-07
Cdk17	3.15835e-09	1.13022e-07
Midn	3.22581e-09	1.15368e-07
Sptan1	3.45114e-09	1.23354e-07
Pxmp2	3.65044e-09	1.30401e-07
Slc6a6	3.75792e-09	1.34162e-07
Cdk9	3.77963e-09	1.34858e-07
Clptm1l	3.96589e-09	1.4142e-07
Map1s	3.98039e-09	1.41854e-07
Impdh1	4.04282e-09	1.43995e-07
Gas2l1	4.17035e-09	1.4845e-07
Fam174b	4.26261e-09	1.51645e-07
Shc1	4.47954e-09	1.5927e-07
Nelfe	4.51465e-09	1.60424e-07
Fdps	4.60045e-09	1.63377e-07
Raly	4.61877e-09	1.63932e-07
Mrfap1	4.66408e-09	1.65444e-07
Cers5	4.84956e-09	1.71923e-07
F13a1	4.85757e-09	1.72106e-07
Htatip2	4.97927e-09	1.76316e-07
Etf1	5.11216e-09	1.80916e-07
Kdm5c	5.18724e-09	1.83466e-07
Cbr2	5.20931e-09	1.84139e-07
Dhrs1	5.27628e-09	1.86398e-07
Atp6v0a2	5.42036e-09	1.91377e-07
Hdgf	5.53322e-09	1.95248e-07
Laptm4a	5.57091e-09	1.96465e-07
Tbc1d1	5.67991e-09	2.00192e-07
Prkab2	5.83242e-09	2.05449e-07
1110008P14Rik	5.90328e-09	2.07824e-07
Scpep1	5.9441e-09	2.0914e-07
Gak	5.99117e-09	2.10674e-07
Son	6.00894e-09	2.11177e-07
Oga	6.141e-09	2.15694e-07
Tmem123	6.18547e-09	2.1713e-07
Clint1	6.19562e-09	2.17361e-07
Slc8a1	6.83262e-09	2.3957e-07
Ogn	6.90953e-09	2.42127e-07
Ctnna1	7.14299e-09	2.50164e-07
Angptl2	7.15177e-09	2.50328e-07
Pdha1	7.1573e-09	2.50377e-07
Lyn	7.36931e-09	2.57645e-07
Enah	7.50836e-09	2.62356e-07
Cct7	7.58543e-09	2.64745e-07
Cd151	7.5819e-09	2.64745e-07
Wwp2	7.75501e-09	2.70508e-07
Mogs	7.79497e-09	2.7159e-07
Rbm5	7.7921e-09	2.7159e-07
Cnot6	7.83302e-09	2.7276e-07
Tmpo	8.04264e-09	2.79899e-07
Parp14	8.20039e-09	2.85226e-07
Grk6	8.29413e-09	2.88321e-07
Desi1	8.5433e-09	2.96813e-07
Sec13	8.74338e-09	3.0359e-07
Tnfaip1	9.07395e-09	3.14889e-07
Plekhg2	9.08229e-09	3.14998e-07
Tmbim6	9.10657e-09	3.15661e-07
Acp2	9.19504e-09	3.18546e-07
Rab31	9.52243e-09	3.29699e-07
Dnajb11	9.59313e-09	3.31958e-07
Acyp2	9.73299e-09	3.36607e-07
1810037I17Rik	9.81077e-09	3.39104e-07
Plekhg3	9.91031e-09	3.4235e-07
Hdac7	1.01453e-08	3.50268e-07
Phc2	1.01976e-08	3.51875e-07
Mylk4	1.07467e-08	3.7061e-07
Mast4	1.07886e-08	3.71845e-07
Egln1	1.08765e-08	3.74663e-07
Pdlim1	1.11657e-08	3.84407e-07
Hprt	1.12143e-08	3.8586e-07
Tmem184b	1.13171e-08	3.88957e-07
Ypel5	1.1313e-08	3.88957e-07
Hnrnpa0	1.1521e-08	3.95741e-07
Tcp11l2	1.2281e-08	4.21609e-07
Esyt2	1.23253e-08	4.22892e-07
Txndc9	1.23882e-08	4.24809e-07
Ogt	1.24341e-08	4.26144e-07
Cbx5	1.24987e-08	4.28115e-07
Rps27rt	1.27999e-08	4.38187e-07
Hspb6	1.30148e-08	4.45293e-07
Rasa3	1.3581e-08	4.64403e-07
Marveld1	1.36703e-08	4.67193e-07
Srp72	1.40701e-08	4.80589e-07
Vwf	1.41133e-08	4.81791e-07
Plekhj1	1.41706e-08	4.83476e-07
Snx3	1.44106e-08	4.91388e-07
Pde4dip	1.52792e-08	5.20717e-07
Plbd2	1.52996e-08	5.21119e-07
Cbfb	1.55044e-08	5.27798e-07
Sirt7	1.55966e-08	5.30642e-07
Fam32a	1.56712e-08	5.32882e-07
Parp9	1.6097e-08	5.47052e-07
Pigt	1.62889e-08	5.53252e-07
Tnpo1	1.62976e-08	5.53252e-07
Ddx39	1.63801e-08	5.55743e-07
Smc5	1.67182e-08	5.66898e-07
Slc2a1	1.69306e-08	5.73778e-07
Acly	1.69847e-08	5.75291e-07
Rer1	1.71415e-08	5.8028e-07
Psen1	1.74465e-08	5.90277e-07
Git1	1.79029e-08	6.0538e-07
Acot2	1.82505e-08	6.16792e-07
Cdkn2d	1.90772e-08	6.44372e-07
Smc4	1.92254e-08	6.49018e-07
Cul7	1.93072e-08	6.51419e-07
Csnk1a1	1.93309e-08	6.51855e-07
Tpp1	2.00492e-08	6.75702e-07
Ext1	2.02466e-08	6.81978e-07
Abcc9	2.07199e-08	6.97533e-07
Tcf12	2.0774e-08	6.98969e-07
Emcn	2.08285e-08	7.00415e-07
Fam98a	2.1267e-08	7.14764e-07
Pdgfrb	2.21887e-08	7.45329e-07
Ogfr	2.28268e-08	7.66339e-07
Arfip1	2.39388e-08	8.0323e-07
Rtf2	2.43273e-08	8.15814e-07
Smarce1	2.47692e-08	8.30175e-07
Ap1m1	2.48386e-08	8.32044e-07
Ssbp4	2.48623e-08	8.32379e-07
Wdfy1	2.51102e-08	8.40216e-07
Cct3	2.53056e-08	8.46143e-07
Rfc2	2.53152e-08	8.46143e-07
Gnptab	2.59484e-08	8.66831e-07
Neu1	2.65622e-08	8.86847e-07
Senp3	2.91243e-08	9.71858e-07
2410002F23Rik	3.03642e-08	1.01212e-06
9530068E07Rik	3.03616e-08	1.01212e-06
Rbx1	3.05872e-08	1.01899e-06
Trmt112	3.09276e-08	1.02977e-06
Sec11c	3.30118e-08	1.09856e-06
Smarcd2	3.33774e-08	1.11013e-06
Coq9	3.34987e-08	1.11355e-06
Tcf4	3.6326e-08	1.20687e-06
Mtmr6	3.76715e-08	1.25089e-06
Ubp1	3.85688e-08	1.27999e-06
Ssbp3	3.86534e-08	1.28209e-06
Gars	3.90057e-08	1.29308e-06
Cops5	3.99338e-08	1.32312e-06
Pprc1	4.08461e-08	1.35261e-06
Nab1	4.11064e-08	1.36049e-06
Vps4b	4.12413e-08	1.36421e-06
Ppp2ca	4.19038e-08	1.38537e-06
Plod2	4.23553e-08	1.39954e-06
Cic	4.29246e-08	1.41758e-06
Map4k3	4.33921e-08	1.43224e-06
Kcnk3	4.35328e-08	1.4361e-06
Psma1	4.37244e-08	1.44164e-06
Cops9	4.40309e-08	1.45096e-06
Ndufc2	4.40568e-08	1.45103e-06
Tcn2	4.43191e-08	1.45888e-06
Tor1aip2	4.48482e-08	1.4755e-06
Aars	4.52198e-08	1.48692e-06
Fam3c	4.58322e-08	1.50624e-06
Tbca	4.60807e-08	1.51324e-06
Scd4	4.6095e-08	1.51324e-06
Cox19	4.7102e-08	1.54547e-06
Uspl1	4.79041e-08	1.57093e-06
Xpo1	4.85462e-08	1.59113e-06
Slc7a6	4.88857e-08	1.60023e-06
Metap2	4.89029e-08	1.60023e-06
Vdac1	4.88799e-08	1.60023e-06
Cct2	4.91488e-08	1.60742e-06
Pdgfa	4.96928e-08	1.62433e-06
Bms1	5.12863e-08	1.67552e-06
Mylk3	5.31832e-08	1.73656e-06
Doc2g	5.34934e-08	1.74575e-06
Trdn	5.55665e-08	1.81243e-06
Slc6a8	5.56896e-08	1.81548e-06
Supt16	5.6228e-08	1.83205e-06
Eif4b	5.69199e-08	1.85359e-06
Creb3	5.72051e-08	1.86189e-06
Trim11	5.74637e-08	1.8693e-06
Ctps	5.83449e-08	1.89695e-06
Gm49980	5.954e-08	1.93477e-06
Banf1	6.00262e-08	1.94953e-06
Med10	6.02454e-08	1.95561e-06
Safb2	6.08601e-08	1.9745e-06
Aldoa	6.14182e-08	1.99155e-06
Aen	6.17843e-08	2.00235e-06
Dync1li1	6.26049e-08	2.02786e-06
Ccnl1	6.4314e-08	2.08212e-06
Ganab	6.47092e-08	2.09379e-06
Ncor2	6.51575e-08	2.10718e-06
Faf2	6.52531e-08	2.10915e-06
Fam210a	6.53439e-08	2.11096e-06
Svbp	6.59334e-08	2.12887e-06
Art3	6.62652e-08	2.13845e-06
Psmb3	6.6509e-08	2.14518e-06
Snx6	6.69327e-08	2.1577e-06
Tm2d2	6.70873e-08	2.16154e-06
Lsm2	6.77005e-08	2.18014e-06
Rnps1	6.85687e-08	2.20693e-06
Htra3	7.09444e-08	2.28219e-06
Usp34	7.14519e-08	2.2973e-06
Cox17	7.21533e-08	2.31862e-06
Fubp1	7.61465e-08	2.44565e-06
Itsn2	7.83454e-08	2.51495e-06
Ccz1	7.88588e-08	2.53009e-06
Zfp207	8.03639e-08	2.57702e-06
Gpr108	8.28104e-08	2.65407e-06
Arpc1a	8.42404e-08	2.69848e-06
F2r	8.48102e-08	2.7153e-06
Bscl2	8.50308e-08	2.72093e-06
Slc35f6	8.57695e-08	2.74313e-06
Atg3	9.0032e-08	2.87794e-06
Parp12	9.20581e-08	2.94116e-06
Ndrg4	9.30576e-08	2.97153e-06
Uggt1	9.58455e-08	3.05895e-06
Ap1g1	9.6598e-08	3.08135e-06
P4ha1	9.733e-08	3.10307e-06
Sec63	9.76178e-08	3.11061e-06
Creb3l2	9.81798e-08	3.12688e-06
Msrb1	9.93438e-08	3.16229e-06
Ube2m	1.00214e-07	3.18834e-06
Bcl6b	1.02198e-07	3.24976e-06
Scamp3	1.02736e-07	3.26343e-06
Mpdu1	1.02724e-07	3.26343e-06
Ece1	1.03628e-07	3.29005e-06
Adarb1	1.08193e-07	3.43321e-06
Morf4l1	1.09994e-07	3.48853e-06
Ipo4	1.10194e-07	3.49303e-06
Pbdc1	1.10297e-07	3.4945e-06
Ndel1	1.1497e-07	3.64064e-06
Leng8	1.17866e-07	3.7304e-06
Slc44a2	1.20553e-07	3.81347e-06
Ccnt2	1.35354e-07	4.27944e-06
Pcgf5	1.3749e-07	4.3447e-06
Cdk11b	1.39695e-07	4.41209e-06
Hpcal1	1.41525e-07	4.46759e-06
Tma7	1.43338e-07	4.52247e-06
Ubtd1	1.43728e-07	4.53243e-06
Perm1	1.47933e-07	4.66258e-06
Prkacb	1.51127e-07	4.76078e-06
Xylt2	1.547e-07	4.87082e-06
Dbndd2	1.55765e-07	4.90002e-06
Ccnd3	1.55788e-07	4.90002e-06
Nrbp1	1.55919e-07	4.90161e-06
Nolc1	1.56237e-07	4.90907e-06
Pald1	1.5827e-07	4.97036e-06
Armcx3	1.58747e-07	4.98278e-06
Smarca4	1.58972e-07	4.98727e-06
Rap1a	1.59467e-07	5.00021e-06
Pqlc1	1.59561e-07	5.00057e-06
Pold1	1.60348e-07	5.02266e-06
Megf8	1.66185e-07	5.2028e-06
Rab8a	1.67956e-07	5.25556e-06
Tbrg1	1.70717e-07	5.3392e-06
Golga7	1.74012e-07	5.43946e-06
Tfe3	1.75252e-07	5.47538e-06
Eif3h	1.80479e-07	5.6358e-06
Atp6v1c1	1.8421e-07	5.74936e-06
Bcl2l1	1.87127e-07	5.8374e-06
Ndufb7	1.89962e-07	5.92281e-06
Maz	1.94317e-07	6.05548e-06
Glt8d1	1.94445e-07	6.05636e-06
Hspb8	1.98801e-07	6.18887e-06
Fbxw8	2.00516e-07	6.23908e-06
Rlim	2.00782e-07	6.24416e-06
Smim3	2.05307e-07	6.38161e-06
Vps54	2.06671e-07	6.42072e-06
Cenpb	2.12218e-07	6.58968e-06
Pip4k2a	2.14219e-07	6.64843e-06
Sf3b1	2.2099e-07	6.85506e-06
Cd2ap	2.26403e-07	7.01941e-06
Jun	2.27432e-07	7.04435e-06
Rnasek	2.27439e-07	7.04435e-06
Ndufa9	2.29382e-07	7.10088e-06
Aplnr	2.30141e-07	7.12077e-06
Copb1	2.36693e-07	7.31978e-06
Gmppb	2.44699e-07	7.56349e-06
Bambi	2.49438e-07	7.70606e-06
Ndrg1	2.51146e-07	7.7549e-06
Pcolce2	2.55299e-07	7.87912e-06
Hmg20b	2.6003e-07	8.02107e-06
Iqsec1	2.60725e-07	8.03842e-06
Wdr89	2.6407e-07	8.13741e-06
Uhrf1bp1l	2.65594e-07	8.18023e-06
Ddx54	2.66967e-07	8.21836e-06
Osbpl9	2.67147e-07	8.21974e-06
Nagk	2.69947e-07	8.30171e-06
Atn1	2.70184e-07	8.30477e-06
Reep3	2.74427e-07	8.43095e-06
Itsn1	2.78035e-07	8.53748e-06
Nasp	2.82027e-07	8.65567e-06
Lamtor1	2.82402e-07	8.66281e-06
Etnk1	2.8552e-07	8.75405e-06
Eif2s2	2.86932e-07	8.79292e-06
Eps15	2.88437e-07	8.83456e-06
Tmem214	2.90379e-07	8.88957e-06
Irgm1	2.90617e-07	8.89239e-06
Nipa2	2.93748e-07	8.98366e-06
Tor3a	2.96585e-07	9.06586e-06
Pdgfb	2.97396e-07	9.0861e-06
Ints3	2.98184e-07	9.1056e-06
Frmd8	3.03133e-07	9.25207e-06
Ubr5	3.03631e-07	9.26263e-06
Akt1s1	3.17252e-07	9.67328e-06
Mta2	3.2455e-07	9.89086e-06
Usp7	3.25377e-07	9.9111e-06
Anapc5	3.25852e-07	9.9206e-06
Fbxo11	3.26081e-07	9.92258e-06
Krcc1	3.27948e-07	9.9744e-06
[truncated: 1,268 more rows]

## Sheet: D
gene	combined_pvalue	adjusted_pvalue
Sulf1	5.55e-17	3.16293e-15
Tram1	5.55e-17	3.16293e-15
Rpl7	5.55e-17	3.16293e-15
Dst	5.55e-17	3.16293e-15
Ptpn18	5.55e-17	3.16293e-15
Uggt1	5.55e-17	3.16293e-15
Ankrd23	5.55e-17	3.16293e-15
Cox5b	5.55e-17	3.16293e-15
Rpl31	5.55e-17	3.16293e-15
Map4k4	5.55e-17	3.16293e-15
Fhl2	5.55e-17	3.16293e-15
Col3a1	5.55e-17	3.16293e-15
Col5a2	5.55e-17	3.16293e-15
Stat1	5.55e-17	3.16293e-15
Sf3b1	5.55e-17	3.16293e-15
Bzw1	5.55e-17	3.16293e-15
Ndufb3	5.55e-17	3.16293e-15
Ndufs1	5.55e-17	3.16293e-15
Eef1b2	5.55e-17	3.16293e-15
Acadl	5.55e-17	3.16293e-15
Rpl37a	5.55e-17	3.16293e-15
Igfbp5	5.55e-17	3.16293e-15
Arpc2	5.55e-17	3.16293e-15
Tmbim1	5.55e-17	3.16293e-15
Slc11a1	5.55e-17	3.16293e-15
Retreg2	5.55e-17	3.16293e-15
Des	5.55e-17	3.16293e-15
Chpf	5.55e-17	3.16293e-15
Serpine2	5.55e-17	3.16293e-15
Ncl	5.55e-17	3.16293e-15
Ptma	5.55e-17	3.16293e-15
Inpp5d	5.55e-17	3.16293e-15
Hjurp	5.55e-17	3.16293e-15
Arl4c	5.55e-17	3.16293e-15
Col6a3	5.55e-17	3.16293e-15
Pam	5.55e-17	3.16293e-15
Actr3	5.55e-17	3.16293e-15
Mcm6	5.55e-17	3.16293e-15
Btg2	5.55e-17	3.16293e-15
Arl8a	5.55e-17	3.16293e-15
Ipo9	5.55e-17	3.16293e-15
Csrp1	5.55e-17	3.16293e-15
Phlda3	5.55e-17	3.16293e-15
Tnnt2	5.55e-17	3.16293e-15
Prg4	5.55e-17	3.16293e-15
Ivns1abp	5.55e-17	3.16293e-15
Arpc5	5.55e-17	3.16293e-15
Ncf2	5.55e-17	3.16293e-15
Lamc1	5.55e-17	3.16293e-15
Ier5	5.55e-17	3.16293e-15
Qsox1	5.55e-17	3.16293e-15
Soat1	5.55e-17	3.16293e-15
Gas5	5.55e-17	3.16293e-15
Dnm3os	5.55e-17	3.16293e-15
Atp1b1	5.55e-17	3.16293e-15
Dpt	5.55e-17	3.16293e-15
Mpc2	5.55e-17	3.16293e-15
Uck2	5.55e-17	3.16293e-15
Mgst3	5.55e-17	3.16293e-15
Olfml2b	5.55e-17	3.16293e-15
Fcgr2b	5.55e-17	3.16293e-15
Fcgr4	5.55e-17	3.16293e-15
Fcgr3	5.55e-17	3.16293e-15
Fcer1g	5.55e-17	3.16293e-15
Ndufs2	5.55e-17	3.16293e-15
Cd84	5.55e-17	3.16293e-15
Copa	5.55e-17	3.16293e-15
Pea15a	5.55e-17	3.16293e-15
Tagln2	5.55e-17	3.16293e-15
Ifi207	5.55e-17	3.16293e-15
Ifi204	5.55e-17	3.16293e-15
Fh1	5.55e-17	3.16293e-15
Hnrnpu	5.55e-17	3.16293e-15
Coq8a	5.55e-17	3.16293e-15
H3f3a	5.55e-17	3.16293e-15
Enah	5.55e-17	3.16293e-15
Degs1	5.55e-17	3.16293e-15
Capn2	5.55e-17	3.16293e-15
Cd34	5.55e-17	3.16293e-15
Phyh	5.55e-17	3.16293e-15
Nudt5	5.55e-17	3.16293e-15
Atp5c1	5.55e-17	3.16293e-15
Vim	5.55e-17	3.16293e-15
Mrc1	5.55e-17	3.16293e-15
Abi1	5.55e-17	3.16293e-15
Tubb4b	5.55e-17	3.16293e-15
Npdc1	5.55e-17	3.16293e-15
Ptgds	5.55e-17	3.16293e-15
Egfl7	5.55e-17	3.16293e-15
Rpl7a	5.55e-17	3.16293e-15
Surf4	5.55e-17	3.16293e-15
Adamtsl2	5.55e-17	3.16293e-15
Col5a1	5.55e-17	3.16293e-15
Sptan1	5.55e-17	3.16293e-15
Crat	5.55e-17	3.16293e-15
Eng	5.55e-17	3.16293e-15
Fam129b	5.55e-17	3.16293e-15
Rpl12	5.55e-17	3.16293e-15
Hspa5	5.55e-17	3.16293e-15
Gsn	5.55e-17	3.16293e-15
Ndufa8	5.55e-17	3.16293e-15
Nek6	5.55e-17	3.16293e-15
Rpl35	5.55e-17	3.16293e-15
Xirp2	5.55e-17	3.16293e-15
Gorasp2	5.55e-17	3.16293e-15
Atp5g3	5.55e-17	3.16293e-15
Hnrnpa3	5.55e-17	3.16293e-15
Ttn	5.55e-17	3.16293e-15
Frzb	5.55e-17	3.16293e-15
Itgav	5.55e-17	3.16293e-15
Selenoh	5.55e-17	3.16293e-15
Serping1	5.55e-17	3.16293e-15
Ndufs3	5.55e-17	3.16293e-15
Slc39a13	5.55e-17	3.16293e-15
Spi1	5.55e-17	3.16293e-15
Mybpc3	5.55e-17	3.16293e-15
Mdk	5.55e-17	3.16293e-15
Creb3l1	5.55e-17	3.16293e-15
Trp53i11	5.55e-17	3.16293e-15
Gm13889	5.55e-17	3.16293e-15
Hsd17b12	5.55e-17	3.16293e-15
Cd44	5.55e-17	3.16293e-15
Rcn1	5.55e-17	3.16293e-15
Actc1	5.55e-17	3.16293e-15
Thbs1	5.55e-17	3.16293e-15
Pdia3	5.55e-17	3.16293e-15
Serf2	5.55e-17	3.16293e-15
B2m	5.55e-17	3.16293e-15
AA467197	5.55e-17	3.16293e-15
Fbn1	5.55e-17	3.16293e-15
Slc20a1	5.55e-17	3.16293e-15
Sirpa	5.55e-17	3.16293e-15
Idh3b	5.55e-17	3.16293e-15
Cpxm1	5.55e-17	3.16293e-15
Ptpra	5.55e-17	3.16293e-15
Prnp	5.55e-17	3.16293e-15
Prnd	5.55e-17	3.16293e-15
Pcna	5.55e-17	3.16293e-15
Dstn	5.55e-17	3.16293e-15
Rrbp1	5.55e-17	3.16293e-15
Snx5	5.55e-17	3.16293e-15
Cd93	5.55e-17	3.16293e-15
Cst3	5.55e-17	3.16293e-15
Acss1	5.55e-17	3.16293e-15
Fkbp1a	5.55e-17	3.16293e-15
Srxn1	5.55e-17	3.16293e-15
H13	5.55e-17	3.16293e-15
Mapre1	5.55e-17	3.16293e-15
Eif6	5.55e-17	3.16293e-15
Rbm39	5.55e-17	3.16293e-15
Dlgap4	5.55e-17	3.16293e-15
Myl9	5.55e-17	3.16293e-15
Rpn2	5.55e-17	3.16293e-15
Tgm2	5.55e-17	3.16293e-15
Mafb	5.55e-17	3.16293e-15
Srsf6	5.55e-17	3.16293e-15
Serinc3	5.55e-17	3.16293e-15
Ccn5	5.55e-17	3.16293e-15
Ywhab	5.55e-17	3.16293e-15
Ube2c	5.55e-17	3.16293e-15
Ctsa	5.55e-17	3.16293e-15
Zfas1	5.55e-17	3.16293e-15
Ptgis	5.55e-17	3.16293e-15
B4galt5	5.55e-17	3.16293e-15
Snai1	5.55e-17	3.16293e-15
Ube2v1	5.55e-17	3.16293e-15
Pmepa1	5.55e-17	3.16293e-15
Ctsz	5.55e-17	3.16293e-15
Atp5e	5.55e-17	3.16293e-15
Rps21	5.55e-17	3.16293e-15
Eef1a2	5.55e-17	3.16293e-15
Tpd52	5.55e-17	3.16293e-15
Fabp5	5.55e-17	3.16293e-15
Fabp4	5.55e-17	3.16293e-15
Ndufb5	5.55e-17	3.16293e-15
Anxa5	5.55e-17	3.16293e-15
Ccna2	5.55e-17	3.16293e-15
Ndufc1	5.55e-17	3.16293e-15
Lhfp	5.55e-17	3.16293e-15
Ufm1	5.55e-17	3.16293e-15
Postn	5.55e-17	3.16293e-15
Tm4sf1	5.55e-17	3.16293e-15
Serp1	5.55e-17	3.16293e-15
Strit1	5.55e-17	3.16293e-15
Ssr3	5.55e-17	3.16293e-15
Lxn	5.55e-17	3.16293e-15
Mfsd1	5.55e-17	3.16293e-15
Smc4	5.55e-17	3.16293e-15
Etfdh	5.55e-17	3.16293e-15
Gask1b	5.55e-17	3.16293e-15
Sfrp2	5.55e-17	3.16293e-15
Rps3a1	5.55e-17	3.16293e-15
Fcrls	5.55e-17	3.16293e-15
Nes	5.55e-17	3.16293e-15
Glmp	5.55e-17	3.16293e-15
Lmna	5.55e-17	3.16293e-15
Ssr2	5.55e-17	3.16293e-15
Arhgef2	5.55e-17	3.16293e-15
Gba	5.55e-17	3.16293e-15
Thbs3	5.55e-17	3.16293e-15
Krtcap2	5.55e-17	3.16293e-15
Adam15	5.55e-17	3.16293e-15
Shc1	5.55e-17	3.16293e-15
Tpm3	5.55e-17	3.16293e-15
Slc39a1	5.55e-17	3.16293e-15
S100a13	5.55e-17	3.16293e-15
S100a4	5.55e-17	3.16293e-15
S100a6	5.55e-17	3.16293e-15
Sprr1a	5.55e-17	3.16293e-15
S100a11	5.55e-17	3.16293e-15
S100a10	5.55e-17	3.16293e-15
Cdc42se1	5.55e-17	3.16293e-15
Cers2	5.55e-17	3.16293e-15
Ctsk	5.55e-17	3.16293e-15
Ctss	5.55e-17	3.16293e-15
Mcl1	5.55e-17	3.16293e-15
Ecm1	5.55e-17	3.16293e-15
Plekho1	5.55e-17	3.16293e-15
Fcgr1	5.55e-17	3.16293e-15
Prkab2	5.55e-17	3.16293e-15
Pde4dip	5.55e-17	3.16293e-15
Atp1a1	5.55e-17	3.16293e-15
Casq2	5.55e-17	3.16293e-15
Olfml3	5.55e-17	3.16293e-15
Rhoc	5.55e-17	3.16293e-15
Capza1	5.55e-17	3.16293e-15
Atp5f1	5.55e-17	3.16293e-15
Chil3	5.55e-17	3.16293e-15
Cd53	5.55e-17	3.16293e-15
Vcam1	5.55e-17	3.16293e-15
Cnn3	5.55e-17	3.16293e-15
Myoz2	5.55e-17	3.16293e-15
Ostc	5.55e-17	3.16293e-15
Rpl34	5.55e-17	3.16293e-15
Hadh	5.55e-17	3.16293e-15
Ube2d3	5.55e-17	3.16293e-15
H2afz	5.55e-17	3.16293e-15
Selenof	5.55e-17	3.16293e-15
Ccn1	5.55e-17	3.16293e-15
Ddah1	5.55e-17	3.16293e-15
Acadm	5.55e-17	3.16293e-15
Rps20	5.55e-17	3.16293e-15
Sdcbp	5.55e-17	3.16293e-15
Decr1	5.55e-17	3.16293e-15
Dnaja1	5.55e-17	3.16293e-15
B4galt1	5.55e-17	3.16293e-15
Vcp	5.55e-17	3.16293e-15
Cd72	5.55e-17	3.16293e-15
Tpm2	5.55e-17	3.16293e-15
Tln1	5.55e-17	3.16293e-15
Glipr2	5.55e-17	3.16293e-15
Clta	5.55e-17	3.16293e-15
Anp32b	5.55e-17	3.16293e-15
Col15a1	5.55e-17	3.16293e-15
Sec61b	5.55e-17	3.16293e-15
Pakap-1	5.55e-17	3.16293e-15
Txn1	5.55e-17	3.16293e-15
Ptbp3	5.55e-17	3.16293e-15
Col27a1	5.55e-17	3.16293e-15
Tnc	5.55e-17	3.16293e-15
Plin2	5.55e-17	3.16293e-15
Rps6	5.55e-17	3.16293e-15
Leprot	5.55e-17	3.16293e-15
Gpx7	5.55e-17	3.16293e-15
Uqcrh	5.55e-17	3.16293e-15
Akr1a1	5.55e-17	3.16293e-15
Prdx1	5.55e-17	3.16293e-15
Rps8	5.55e-17	3.16293e-15
Atp6v0b	5.55e-17	3.16293e-15
Elovl1	5.55e-17	3.16293e-15
P3h1	5.55e-17	3.16293e-15
Ndufs5	5.55e-17	3.16293e-15
Cdca8	5.55e-17	3.16293e-15
Rnf19b	5.55e-17	3.16293e-15
Fndc5	5.55e-17	3.16293e-15
Col16a1	5.55e-17	3.16293e-15
Fabp3	5.55e-17	3.16293e-15
Sdc3	5.55e-17	3.16293e-15
Laptm5	5.55e-17	3.16293e-15
Snhg3	5.55e-17	3.16293e-15
Atpif1	5.55e-17	3.16293e-15
Cd52	5.55e-17	3.16293e-15
Sh3bgrl3	5.55e-17	3.16293e-15
Stmn1	5.55e-17	3.16293e-15
Selenon	5.55e-17	3.16293e-15
Rsrp1	5.55e-17	3.16293e-15
Fuca1	5.55e-17	3.16293e-15
Rpl11	5.55e-17	3.16293e-15
Id3	5.55e-17	3.16293e-15
C1qb	5.55e-17	3.16293e-15
C1qc	5.55e-17	3.16293e-15
C1qa	5.55e-17	3.16293e-15
Cdc42	5.55e-17	3.16293e-15
Hspg2	5.55e-17	3.16293e-15
Ddost	5.55e-17	3.16293e-15
Pink1	5.55e-17	3.16293e-15
Capzb	5.55e-17	3.16293e-15
Rcc2	5.55e-17	3.16293e-15
Sdhb	5.55e-17	3.16293e-15
Atp13a2	5.55e-17	3.16293e-15
Mfap2	5.55e-17	3.16293e-15
Necap2	5.55e-17	3.16293e-15
Hspb7	5.55e-17	3.16293e-15
Efhd2	5.55e-17	3.16293e-15
Pdpn	5.55e-17	3.16293e-15
Plod1	5.55e-17	3.16293e-15
Nppb	5.55e-17	3.16293e-15
Nppa	5.55e-17	3.16293e-15
Srm	5.55e-17	3.16293e-15
Pgd	5.55e-17	3.16293e-15
Eno1	5.55e-17	3.16293e-15
Gpr153	5.55e-17	3.16293e-15
Rpl22	5.55e-17	3.16293e-15
Ski	5.55e-17	3.16293e-15
Gnb1	5.55e-17	3.16293e-15
Mmp23	5.55e-17	3.16293e-15
Ccnl2	5.55e-17	3.16293e-15
Mxra8	5.55e-17	3.16293e-15
Isg15	5.55e-17	3.16293e-15
Cd36	5.55e-17	3.16293e-15
Fgl2	5.55e-17	3.16293e-15
Lrrc17	5.55e-17	3.16293e-15
AI506816	5.55e-17	3.16293e-15
Chpf2	5.55e-17	3.16293e-15
Tyms	5.55e-17	3.16293e-15
Hadha	5.55e-17	3.16293e-15
Hadhb	5.55e-17	3.16293e-15
Kcnk3	5.55e-17	3.16293e-15
Tmem214	5.55e-17	3.16293e-15
Emilin1	5.55e-17	3.16293e-15
Fosl2	5.55e-17	3.16293e-15
Ywhah	5.55e-17	3.16293e-15
Wdr1	5.55e-17	3.16293e-15
Sod3	5.55e-17	3.16293e-15
Ugdh	5.55e-17	3.16293e-15
Uchl1	5.55e-17	3.16293e-15
Hopx	5.55e-17	3.16293e-15
Igfbp7	5.55e-17	3.16293e-15
Cxcl5	5.55e-17	3.16293e-15
Pf4	5.55e-17	3.16293e-15
Scarb2	5.55e-17	3.16293e-15
Sept11	5.55e-17	3.16293e-15
Anxa3	5.55e-17	3.16293e-15
Sec31a	5.55e-17	3.16293e-15
Plac8	5.55e-17	3.16293e-15
Spp1	5.55e-17	3.16293e-15
Rpl5	5.55e-17	3.16293e-15
Atp5k	5.55e-17	3.16293e-15
Crlf2	5.55e-17	3.16293e-15
Pxmp2	5.55e-17	3.16293e-15
Selplg	5.55e-17	3.16293e-15
Coro1c	5.55e-17	3.16293e-15
Kctd10	5.55e-17	3.16293e-15
Oasl2	5.55e-17	3.16293e-15
Mlec	5.55e-17	3.16293e-15
Dynll1	5.55e-17	3.16293e-15
Cox6a1	5.55e-17	3.16293e-15
Rplp0	5.55e-17	3.16293e-15
Oas2	5.55e-17	3.16293e-15
Rpl6	5.55e-17	3.16293e-15
Erp29	5.55e-17	3.16293e-15
Myl2	5.55e-17	3.16293e-15
Ppp1cc	5.55e-17	3.16293e-15
Vps29	5.55e-17	3.16293e-15
Arpc3	5.55e-17	3.16293e-15
Atp2a2	5.55e-17	3.16293e-15
Anapc5	5.55e-17	3.16293e-15
Ubc	5.55e-17	3.16293e-15
Ran	5.55e-17	3.16293e-15
Nipsnap2	5.55e-17	3.16293e-15
Cct6a	5.55e-17	3.16293e-15
Chchd2	5.55e-17	3.16293e-15
Gusb	5.55e-17	3.16293e-15
Ncf1	5.55e-17	3.16293e-15
Lat2	5.55e-17	3.16293e-15
Eln	5.55e-17	3.16293e-15
Por	5.55e-17	3.16293e-15
Mdh2	5.55e-17	3.16293e-15
Hspb1	5.55e-17	3.16293e-15
Ywhag	5.55e-17	3.16293e-15
Plod3	5.55e-17	3.16293e-15
Ap1s1	5.55e-17	3.16293e-15
Serpine1	5.55e-17	3.16293e-15
Srrt	5.55e-17	3.16293e-15
Gnb2	5.55e-17	3.16293e-15
Pcolce	5.55e-17	3.16293e-15
Fam20c	5.55e-17	3.16293e-15
Eif3b	5.55e-17	3.16293e-15
Actb	5.55e-17	3.16293e-15
Fscn1	5.55e-17	3.16293e-15
Kdelr2	5.55e-17	3.16293e-15
Rac1	5.55e-17	3.16293e-15
Arpc1b	5.55e-17	3.16293e-15
Atp5j2	5.55e-17	3.16293e-15
Rpl21	5.55e-17	3.16293e-15
Pomp	5.55e-17	3.16293e-15
Alox5ap	5.55e-17	3.16293e-15
Medag	5.55e-17	3.16293e-15
Ndufa4	5.55e-17	3.16293e-15
Ndufa5	5.55e-17	3.16293e-15
Arf5	5.55e-17	3.16293e-15
Calu	5.55e-17	3.16293e-15
Flnc	5.55e-17	3.16293e-15
Irf5	5.55e-17	3.16293e-15
Mest	5.55e-17	3.16293e-15
Akr1b8	5.55e-17	3.16293e-15
Cald1	5.55e-17	3.16293e-15
Mtpn	5.55e-17	3.16293e-15
Ptn	5.55e-17	3.16293e-15
Zc3hav1	5.55e-17	3.16293e-15
Fmc1	5.55e-17	3.16293e-15
Ndufb2	5.55e-17	3.16293e-15
Zyx	5.55e-17	3.16293e-15
Tmem176b	5.55e-17	3.16293e-15
Tmem176a	5.55e-17	3.16293e-15
Gpnmb	5.55e-17	3.16293e-15
Cycs	5.55e-17	3.16293e-15
Hnrnpa2b1	5.55e-17	3.16293e-15
Skap2	5.55e-17	3.16293e-15
Gars	5.55e-17	3.16293e-15
Fkbp9	5.55e-17	3.16293e-15
Vamp8	5.55e-17	3.16293e-15
Capg	5.55e-17	3.16293e-15
Tmsb10	5.55e-17	3.16293e-15
Suclg1	5.55e-17	3.16293e-15
Dok1	5.55e-17	3.16293e-15
Loxl3	5.55e-17	3.16293e-15
Aup1	5.55e-17	3.16293e-15
Mthfd2	5.55e-17	3.16293e-15
Mob1a	5.55e-17	3.16293e-15
Snrpg	5.55e-17	3.16293e-15
Pcbp1	5.55e-17	3.16293e-15
Anxa4	5.55e-17	3.16293e-15
Copg1	5.55e-17	3.16293e-15
Rpn1	5.55e-17	3.16293e-15
Sec61a1	5.55e-17	3.16293e-15
Fbln2	5.55e-17	3.16293e-15
Adamts9	5.55e-17	3.16293e-15
Bhlhe40	5.55e-17	3.16293e-15
Edem1	5.55e-17	3.16293e-15
Camk1	5.55e-17	3.16293e-15
Arpc4	5.55e-17	3.16293e-15
Rpl32	5.55e-17	3.16293e-15
Plxnd1	5.55e-17	3.16293e-15
Cxcl12	5.55e-17	3.16293e-15
Hnrnpf	5.55e-17	3.16293e-15
Tuba8	5.55e-17	3.16293e-15
Usp18	5.55e-17	3.16293e-15
Mfap5	5.55e-17	3.16293e-15
C3ar1	5.55e-17	3.16293e-15
Clec4a3	5.55e-17	3.16293e-15
Clec4n	5.55e-17	3.16293e-15
Clec4d	5.55e-17	3.16293e-15
Ptpn6	5.55e-17	3.16293e-15
P3h3	5.55e-17	3.16293e-15
Ptms	5.55e-17	3.16293e-15
Gapdh	5.55e-17	3.16293e-15
Tnfrsf1a	5.55e-17	3.16293e-15
Cd9	5.55e-17	3.16293e-15
Tspan9	5.55e-17	3.16293e-15
Clec12a	5.55e-17	3.16293e-15
Emp1	5.55e-17	3.16293e-15
H2afj	5.55e-17	3.16293e-15
Mgp	5.55e-17	3.16293e-15
Arhgdib	5.55e-17	3.16293e-15
Ldhb	5.55e-17	3.16293e-15
Myadm	5.55e-17	3.16293e-15
Ndufa3	5.55e-17	3.16293e-15
Rps9	5.55e-17	3.16293e-15
Pirb	5.55e-17	3.16293e-15
Tnni3	5.55e-17	3.16293e-15
Rpl28	5.55e-17	3.16293e-15
Ube2s	5.55e-17	3.16293e-15
Rps5	5.55e-17	3.16293e-15
Selenow	5.55e-17	3.16293e-15
Ehd2	5.55e-17	3.16293e-15
C5ar1	5.55e-17	3.16293e-15
Ap2s1	5.55e-17	3.16293e-15
Slc1a5	5.55e-17	3.16293e-15
Vasp	5.55e-17	3.16293e-15
Ckm	5.55e-17	3.16293e-15
Apoe	5.55e-17	3.16293e-15
Bcl3	5.55e-17	3.16293e-15
Plaur	5.55e-17	3.16293e-15
Rps19	5.55e-17	3.16293e-15
Tgfb1	5.55e-17	3.16293e-15
Axl	5.55e-17	3.16293e-15
Blvrb	5.55e-17	3.16293e-15
Pld3	5.55e-17	3.16293e-15
Rps16	5.55e-17	3.16293e-15
Plekhg2	5.55e-17	3.16293e-15
Ech1	5.55e-17	3.16293e-15
Actn4	5.55e-17	3.16293e-15
2200002D01Rik	5.55e-17	3.16293e-15
Cox7a1	5.55e-17	3.16293e-15
Capns1	5.55e-17	3.16293e-15
Tyrobp	5.55e-17	3.16293e-15
Cox6b1	5.55e-17	3.16293e-15
Fxyd5	5.55e-17	3.16293e-15
Gramd1a	5.55e-17	3.16293e-15
Gpi1	5.55e-17	3.16293e-15
Etfb	5.55e-17	3.16293e-15
Rcn3	5.55e-17	3.16293e-15
Rps11	5.55e-17	3.16293e-15
Rpl13a	5.55e-17	3.16293e-15
Hrc	5.55e-17	3.16293e-15
Snrnp70	5.55e-17	3.16293e-15
Ftl1	5.55e-17	3.16293e-15
Bax	5.55e-17	3.16293e-15
Rpl18	5.55e-17	3.16293e-15
Kdelr1	5.55e-17	3.16293e-15
Emp3	5.55e-17	3.16293e-15
Csrp3	5.55e-17	3.16293e-15
Mfge8	5.55e-17	3.16293e-15
Anpep	5.55e-17	3.16293e-15
Idh2	5.55e-17	3.16293e-15
Fes	5.55e-17	3.16293e-15
Furin	5.55e-17	3.16293e-15
Iqgap1	5.55e-17	3.16293e-15
Ctsc	5.55e-17	3.16293e-15
Prss23	5.55e-17	3.16293e-15
Picalm	5.55e-17	3.16293e-15
Ndufc2	5.55e-17	3.16293e-15
Myo7a	5.55e-17	3.16293e-15
Lrrc32	5.55e-17	3.16293e-15
Dgat2	5.55e-17	3.16293e-15
Serpinh1	5.55e-17	3.16293e-15
Rps3	5.55e-17	3.16293e-15
Spcs2	5.55e-17	3.16293e-15
Ucp2	5.55e-17	3.16293e-15
Rab6a	5.55e-17	3.16293e-15
P2ry6	5.55e-17	3.16293e-15
Arap1	5.55e-17	3.16293e-15
Rhog	5.55e-17	3.16293e-15
Hbb-bt	5.55e-17	3.16293e-15
Hbb-bs	5.55e-17	3.16293e-15
Cavin3	5.55e-17	3.16293e-15
Ilk	5.55e-17	3.16293e-15
Rpl27a	5.55e-17	3.16293e-15
Mical2	5.55e-17	3.16293e-15
Parva	5.55e-17	3.16293e-15
Rps13	5.55e-17	3.16293e-15
Rps15a	5.55e-17	3.16293e-15
Arl6ip1	5.55e-17	3.16293e-15
Itpripl2	5.55e-17	3.16293e-15
Uqcrc2	5.55e-17	3.16293e-15
Ndufab1	5.55e-17	3.16293e-15
Il4ra	5.55e-17	3.16293e-15
Nupr1	5.55e-17	3.16293e-15
Bola2	5.55e-17	3.16293e-15
Coro1a	5.55e-17	3.16293e-15
Mapk3	5.55e-17	3.16293e-15
Aldoa	5.55e-17	3.16293e-15
Cdipt	5.55e-17	3.16293e-15
Mvp	5.55e-17	3.16293e-15
Vkorc1	5.55e-17	3.16293e-15
Fus	5.55e-17	3.16293e-15
Itgam	5.55e-17	3.16293e-15
Cox6a2	5.55e-17	3.16293e-15
Tgfb1i1	5.55e-17	3.16293e-15
Rgs10	5.55e-17	3.16293e-15
Adam12	5.55e-17	3.16293e-15
Mki67	5.55e-17	3.16293e-15
Adam8	5.55e-17	3.16293e-15
Cox8b	5.55e-17	3.16293e-15
Ifitm2	5.55e-17	3.16293e-15
Ifitm3	5.55e-17	3.16293e-15
Rnh1	5.55e-17	3.16293e-15
Irf7	5.55e-17	3.16293e-15
Taldo1	5.55e-17	3.16293e-15
Rplp2	5.55e-17	3.16293e-15
Tspan4	5.55e-17	3.16293e-15
Ap2a2	5.55e-17	3.16293e-15
Ctsd	5.55e-17	3.16293e-15
Lsp1	5.55e-17	3.16293e-15
Cttn	5.55e-17	3.16293e-15
Ccnd1	5.55e-17	3.16293e-15
Col4a1	5.55e-17	3.16293e-15
Col4a2	5.55e-17	3.16293e-15
Ankrd10	5.55e-17	3.16293e-15
Lamp1	5.55e-17	3.16293e-15
Myom2	5.55e-17	3.16293e-15
Ikbkb	5.55e-17	3.16293e-15
Sfrp1	5.55e-17	3.16293e-15
Adam9	5.55e-17	3.16293e-15
Star	5.55e-17	3.16293e-15
Msr1	5.55e-17	3.16293e-15
Asah1	5.55e-17	3.16293e-15
Sorbs2	5.55e-17	3.16293e-15
Slc25a4	5.55e-17	3.16293e-15
Acsl1	5.55e-17	3.16293e-15
Spcs3	5.55e-17	3.16293e-15
Hmgb2	5.55e-17	3.16293e-15
Lpl	5.55e-17	3.16293e-15
Ndufa13	5.55e-17	3.16293e-15
Gatad2a	5.55e-17	3.16293e-15
Cope	5.55e-17	3.16293e-15
Crlf1	5.55e-17	3.16293e-15
Gdf15	5.55e-17	3.16293e-15
Jund	5.55e-17	3.16293e-15
Ifi30	5.55e-17	3.16293e-15
Rpl18a	5.55e-17	3.16293e-15
Map1s	5.55e-17	3.16293e-15
Myo9b	5.55e-17	3.16293e-15
Plvap	5.55e-17	3.16293e-15
Bst2	5.55e-17	3.16293e-15
Colgalt1	5.55e-17	3.16293e-15
Tpm4	5.55e-17	3.16293e-15
Tmem38a	5.55e-17	3.16293e-15
Hmox1	5.55e-17	3.16293e-15
Mcm5	5.55e-17	3.16293e-15
Calr	5.55e-17	3.16293e-15
Junb	5.55e-17	3.16293e-15
Trir	5.55e-17	3.16293e-15
Man2b1	5.55e-17	3.16293e-15
Adcy7	5.55e-17	3.16293e-15
Mmp2	5.55e-17	3.16293e-15
Ces1d	5.55e-17	3.16293e-15
Mt2	5.55e-17	3.16293e-15
Mt1	5.55e-17	3.16293e-15
Got2	5.55e-17	3.16293e-15
Cmtm3	5.55e-17	3.16293e-15
Rrad	5.55e-17	3.16293e-15
Tmem208	5.55e-17	3.16293e-15
Atp6v0d1	5.55e-17	3.16293e-15
Slc12a4	5.55e-17	3.16293e-15
Wwp2	5.55e-17	3.16293e-15
Hp	5.55e-17	3.16293e-15
Cotl1	5.55e-17	3.16293e-15
Cox4i1	5.55e-17	3.16293e-15
Cyba	5.55e-17	3.16293e-15
Piezo1	5.55e-17	3.16293e-15
Aprt	5.55e-17	3.16293e-15
Rpl13	5.55e-17	3.16293e-15
Tcf25	5.55e-17	3.16293e-15
Tubb3	5.55e-17	3.16293e-15
Acta1	5.55e-17	3.16293e-15
Galnt2	5.55e-17	3.16293e-15
Itgb1	5.55e-17	3.16293e-15
Mmp3	5.55e-17	3.16293e-15
Col5a3	5.55e-17	3.16293e-15
Ppan	5.55e-17	3.16293e-15
Dnmt1	5.55e-17	3.16293e-15
Prkcsh	5.55e-17	3.16293e-15
Acp5	5.55e-17	3.16293e-15
Stt3a	5.55e-17	3.16293e-15
Slc37a2	5.55e-17	3.16293e-15
Esam	5.55e-17	3.16293e-15
Tbrg1	5.55e-17	3.16293e-15
Hspa8	5.55e-17	3.16293e-15
Oaf	5.55e-17	3.16293e-15
Thy1	5.55e-17	3.16293e-15
Mcam	5.55e-17	3.16293e-15
Rps25	5.55e-17	3.16293e-15
Atp5l	5.55e-17	3.16293e-15
Il10ra	5.55e-17	3.16293e-15
Tagln	5.55e-17	3.16293e-15
Rexo2	5.55e-17	3.16293e-15
Sdhd	5.55e-17	3.16293e-15
Cryab	5.55e-17	3.16293e-15
Acat1	5.55e-17	3.16293e-15
Idh3a	5.55e-17	3.16293e-15
Etfa	5.55e-17	3.16293e-15
Commd4	5.55e-17	3.16293e-15
1700017B05Rik	5.55e-17	3.16293e-15
Cox5a	5.55e-17	3.16293e-15
Csk	5.55e-17	3.16293e-15
Loxl1	5.55e-17	3.16293e-15
Nptn	5.55e-17	3.16293e-15
Hexa	5.55e-17	3.16293e-15
Pkm	5.55e-17	3.16293e-15
Rplp1	5.55e-17	3.16293e-15
Rpl4	5.55e-17	3.16293e-15
Rab11a	5.55e-17	3.16293e-15
Cilp	5.55e-17	3.16293e-15
Plekho2	5.55e-17	3.16293e-15
Ppib	5.55e-17	3.16293e-15
Rps27l	5.55e-17	3.16293e-15
Tpm1	5.55e-17	3.16293e-15
Anxa2	5.55e-17	3.16293e-15
Bnip2	5.55e-17	3.16293e-15
Myo1e	5.55e-17	3.16293e-15
Adam10	5.55e-17	3.16293e-15
Aldh1a2	5.55e-17	3.16293e-15
Myzap	5.55e-17	3.16293e-15
Eef1a1	5.55e-17	3.16293e-15
Col12a1	5.55e-17	3.16293e-15
Cox7a2	5.55e-17	3.16293e-15
Snhg5	5.55e-17	3.16293e-15
Tmed3	5.55e-17	3.16293e-15
Ctsh	5.55e-17	3.16293e-15
Atp1b3	5.55e-17	3.16293e-15
Rbp1	5.55e-17	3.16293e-15
Trf	5.55e-17	3.16293e-15
Rpl29	5.55e-17	3.16293e-15
Parp3	5.55e-17	3.16293e-15
Manf	5.55e-17	3.16293e-15
Rassf1	5.55e-17	3.16293e-15
Gnai2	5.55e-17	3.16293e-15
Sema3f	5.55e-17	3.16293e-15
Rbm5	5.55e-17	3.16293e-15
Rhoa	5.55e-17	3.16293e-15
Gpx1	5.55e-17	3.16293e-15
Uqcrc1	5.55e-17	3.16293e-15
Shisa5	5.55e-17	3.16293e-15
Tma7	5.55e-17	3.16293e-15
Map4	5.55e-17	3.16293e-15
Myl3	5.55e-17	3.16293e-15
Pdcd6ip	5.55e-17	3.16293e-15
Crtap	5.55e-17	3.16293e-15
Tgfbr2	5.55e-17	3.16293e-15
Myd88	5.55e-17	3.16293e-15
Scn5a	5.55e-17	3.16293e-15
Rpsa	5.55e-17	3.16293e-15
Rpl14	5.55e-17	3.16293e-15
Ctnnb1	5.55e-17	3.16293e-15
Lars2	5.55e-17	3.16293e-15
Ccr2	5.55e-17	3.16293e-15
Ccr5	5.55e-17	3.16293e-15
Ifngr1	5.55e-17	3.16293e-15
Rps12	5.55e-17	3.16293e-15
Ccn2	5.55e-17	3.16293e-15
Enpp1	5.55e-17	3.16293e-15
Arg1	5.55e-17	3.16293e-15
Marcks	5.55e-17	3.16293e-15
Lama4	5.55e-17	3.16293e-15
Cd24a	5.55e-17	3.16293e-15
Lilr4b	5.55e-17	3.16293e-15
Lilrb4a	5.55e-17	3.16293e-15
Pln	5.55e-17	3.16293e-15
Psap	5.55e-17	3.16293e-15
Vsir	5.55e-17	3.16293e-15
Sgpl1	5.55e-17	3.16293e-15
Srgn	5.55e-17	3.16293e-15
Cdk1	5.55e-17	3.16293e-15
Bicc1	5.55e-17	3.16293e-15
Mif	5.55e-17	3.16293e-15
Chchd10	5.55e-17	3.16293e-15
Col6a2	5.55e-17	3.16293e-15
Col6a1	5.55e-17	3.16293e-15
Col18a1	5.55e-17	3.16293e-15
Itgb2	5.55e-17	3.16293e-15
Cstb	5.55e-17	3.16293e-15
Fstl3	5.55e-17	3.16293e-15
Ptbp1	5.55e-17	3.16293e-15
Cnn2	5.55e-17	3.16293e-15
Arhgap45	5.55e-17	3.16293e-15
Sbno2	5.55e-17	3.16293e-15
Atp5d	5.55e-17	3.16293e-15
Dazap1	5.55e-17	3.16293e-15
Rps15	5.55e-17	3.16293e-15
Uqcr11	5.55e-17	3.16293e-15
Eef2	5.55e-17	3.16293e-15
Nmrk2	5.55e-17	3.16293e-15
Txnrd1	5.55e-17	3.16293e-15
Ckap4	5.55e-17	3.16293e-15
Hsp90b1	5.55e-17	3.16293e-15
Igf1	5.55e-17	3.16293e-15
Arl1	5.55e-17	3.16293e-15
Ikbip	5.55e-17	3.16293e-15
Slc25a3	5.55e-17	3.16293e-15
Elk3	5.55e-17	3.16293e-15
Ndufa12	5.55e-17	3.16293e-15
Mrpl42	5.55e-17	3.16293e-15
Btg1	5.55e-17	3.16293e-15
Dcn	5.55e-17	3.16293e-15
Lum	5.55e-17	3.16293e-15
Csrp2	5.55e-17	3.16293e-15
Nap1l1	5.55e-17	3.16293e-15
Glipr1	5.55e-17	3.16293e-15
Lyz2	5.55e-17	3.16293e-15
Rap1b	5.55e-17	3.16293e-15
Gns	5.55e-17	3.16293e-15
Cdk4	5.55e-17	3.16293e-15
Os9	5.55e-17	3.16293e-15
Arhgef25	5.55e-17	3.16293e-15
Dctn2	5.55e-17	3.16293e-15
Lrp1	5.55e-17	3.16293e-15
Naca	5.55e-17	3.16293e-15
Ptges3	5.55e-17	3.16293e-15
Atp5b	5.55e-17	3.16293e-15
Cnpy2	5.55e-17	3.16293e-15
Cs	5.55e-17	3.16293e-15
Myl6	5.55e-17	3.16293e-15
Esyt1	5.55e-17	3.16293e-15
Rpl41	5.55e-17	3.16293e-15
Rps26	5.55e-17	3.16293e-15
Cd63	5.55e-17	3.16293e-15
Itga7	5.55e-17	3.16293e-15
Selenom	5.55e-17	3.16293e-15
Uqcr10	5.55e-17	3.16293e-15
Ewsr1	5.55e-17	3.16293e-15
Xbp1	5.55e-17	3.16293e-15
Pgam2	5.55e-17	3.16293e-15
Aebp1	5.55e-17	3.16293e-15
Ogdh	5.55e-17	3.16293e-15
Ppia	5.55e-17	3.16293e-15
Igfbp3	5.55e-17	3.16293e-15
Tns3	5.55e-17	3.16293e-15
Sec61g	5.55e-17	3.16293e-15
Plek	5.55e-17	3.16293e-15
Actr2	5.55e-17	3.16293e-15
Rab1a	5.55e-17	3.16293e-15
Mdh1	5.55e-17	3.16293e-15
Rps27a	5.55e-17	3.16293e-15
Rtn4	5.55e-17	3.16293e-15
Acyp2	5.55e-17	3.16293e-15
Hba-a1	5.55e-17	3.16293e-15
Hba-a2	5.55e-17	3.16293e-15
Sh3pxd2b	5.55e-17	3.16293e-15
Npm1	5.55e-17	3.16293e-15
Adam19	5.55e-17	3.16293e-15
Rack1	5.55e-17	3.16293e-15
Sqstm1	5.55e-17	3.16293e-15
Canx	5.55e-17	3.16293e-15
Hnrnph1	5.55e-17	3.16293e-15
Adamts2	5.55e-17	3.16293e-15
Hnrnpab	5.55e-17	3.16293e-15
Nhp2	5.55e-17	3.16293e-15
Uqcrq	5.55e-17	3.16293e-15
P4ha2	5.55e-17	3.16293e-15
Hint1	5.55e-17	3.16293e-15
Gpx3	5.55e-17	3.16293e-15
Anxa6	5.55e-17	3.16293e-15
Gm2a	5.55e-17	3.16293e-15
Atox1	5.55e-17	3.16293e-15
Arf1	5.55e-17	3.16293e-15
Mprip	5.55e-17	3.16293e-15
Mfap4	5.55e-17	3.16293e-15
Ubb	5.55e-17	3.16293e-15
2410006H16Rik	5.55e-17	3.16293e-15
Rpl26	5.55e-17	3.16293e-15
Efnb3	5.55e-17	3.16293e-15
Cd68	5.55e-17	3.16293e-15
Eif4a1	5.55e-17	3.16293e-15
Kctd11	5.55e-17	3.16293e-15
Eif5a	5.55e-17	3.16293e-15
Slc2a4	5.55e-17	3.16293e-15
Gabarap	5.55e-17	3.16293e-15
Acadvl	5.55e-17	3.16293e-15
Arrb2	5.55e-17	3.16293e-15
Cxcl16	5.55e-17	3.16293e-15
Slc25a11	5.55e-17	3.16293e-15
Pfn1	5.55e-17	3.16293e-15
Eno3	5.55e-17	3.16293e-15
Tax1bp3	5.55e-17	3.16293e-15
Serpinf1	5.55e-17	3.16293e-15
Pitpna	5.55e-17	3.16293e-15
Myo1c	5.55e-17	3.16293e-15
Crk	5.55e-17	3.16293e-15
Nxn	5.55e-17	3.16293e-15
Rpl23a	5.55e-17	3.16293e-15
Lgals9	5.55e-17	3.16293e-15
Wsb1	5.55e-17	3.16293e-15
Evi2a	5.55e-17	3.16293e-15
Ccl2	5.55e-17	3.16293e-15
Ccl7	5.55e-17	3.16293e-15
Ccl12	5.55e-17	3.16293e-15
Ccl8	5.55e-17	3.16293e-15
Slfn2	5.55e-17	3.16293e-15
Slfn4	5.55e-17	3.16293e-15
Ccl9	5.55e-17	3.16293e-15
Ccl6	5.55e-17	3.16293e-15
Wfdc17	5.55e-17	3.16293e-15
Vmp1	5.55e-17	3.16293e-15
Cltc	5.55e-17	3.16293e-15
Srsf1	5.55e-17	3.16293e-15
Nme1	5.55e-17	3.16293e-15
Luc7l3	5.55e-17	3.16293e-15
Lrrc59	5.55e-17	3.16293e-15
Ppp1r9b	5.55e-17	3.16293e-15
Atp5g1	5.55e-17	3.16293e-15
Kpnb1	5.55e-17	3.16293e-15
Rpl23	5.55e-17	3.16293e-15
Lasp1	5.55e-17	3.16293e-15
Rpl19	5.55e-17	3.16293e-15
Tcap	5.55e-17	3.16293e-15
Top2a	5.55e-17	3.16293e-15
Igfbp4	5.55e-17	3.16293e-15
Fkbp10	5.55e-17	3.16293e-15
Rab5c	5.55e-17	3.16293e-15
Stat3	5.55e-17	3.16293e-15
Cavin1	5.55e-17	3.16293e-15
Rpl27	5.55e-17	3.16293e-15
Vat1	5.55e-17	3.16293e-15
Tmem106a	5.55e-17	3.16293e-15
Meox1	5.55e-17	3.16293e-15
Grn	5.55e-17	3.16293e-15
Mrc2	5.55e-17	3.16293e-15
Pecam1	5.55e-17	3.16293e-15
Ddx5	5.55e-17	3.16293e-15
Prkar1a	5.55e-17	3.16293e-15
Rpl38	5.55e-17	3.16293e-15
Cd300c2	5.55e-17	3.16293e-15
Atp5h	5.55e-17	3.16293e-15
Jpt1	5.55e-17	3.16293e-15
H3f3b	5.55e-17	3.16293e-15
Trim47	5.55e-17	3.16293e-15
Srsf2	5.55e-17	3.16293e-15
Sept9	5.55e-17	3.16293e-15
Birc5	5.55e-17	3.16293e-15
Socs3	5.55e-17	3.16293e-15
Pgs1	5.55e-17	3.16293e-15
Timp2	5.55e-17	3.16293e-15
Lgals3bp	5.55e-17	3.16293e-15
Rnf213	5.55e-17	3.16293e-15
Slc38a10	5.55e-17	3.16293e-15
Actg1	5.55e-17	3.16293e-15
P4hb	5.55e-17	3.16293e-15
Arhgdia	5.55e-17	3.16293e-15
Sdc1	5.55e-17	3.16293e-15
Pdia6	5.55e-17	3.16293e-15
Odc1	5.55e-17	3.16293e-15
Ywhaq	5.55e-17	3.16293e-15
Rsad2	5.55e-17	3.16293e-15
Rps7	5.55e-17	3.16293e-15
Pxdn	5.55e-17	3.16293e-15
Lamb1	5.55e-17	3.16293e-15
Rps29	5.55e-17	3.16293e-15
Rpl36al	5.55e-17	3.16293e-15
Psma3	5.55e-17	3.16293e-15
Hif1a	5.55e-17	3.16293e-15
Rhoj	5.55e-17	3.16293e-15
Actn1	5.55e-17	3.16293e-15
Srsf5	5.55e-17	3.16293e-15
Npc2	5.55e-17	3.16293e-15
Ltbp2	5.55e-17	3.16293e-15
Pgf	5.55e-17	3.16293e-15
Tgfb3	5.55e-17	3.16293e-15
Calm1	5.55e-17	3.16293e-15
Ndufb1-ps	5.55e-17	3.16293e-15
Lgmn	5.55e-17	3.16293e-15
Asb2	5.55e-17	3.16293e-15
Ifi27	5.55e-17	3.16293e-15
Ifi27l2a	5.55e-17	3.16293e-15
Serpina3n	5.55e-17	3.16293e-15
Meg3	5.55e-17	3.16293e-15
Dync1h1	5.55e-17	3.16293e-15
Hsp90aa1	5.55e-17	3.16293e-15
Eif5	5.55e-17	3.16293e-15
Ckb	5.55e-17	3.16293e-15
Atp5mpl	5.55e-17	3.16293e-15
Inf2	5.55e-17	3.16293e-15
Pld4	5.55e-17	3.16293e-15
Ahnak2	5.55e-17	3.16293e-15
Crip2	5.55e-17	3.16293e-15
Crip1	5.55e-17	3.16293e-15
Gdi2	5.55e-17	3.16293e-15
Pfkp	5.55e-17	3.16293e-15
Actn2	5.55e-17	3.16293e-15
Lgals8	5.55e-17	3.16293e-15
Gpr137b	5.55e-17	3.16293e-15
Nid1	5.55e-17	3.16293e-15
Hist1h2bc	5.55e-17	3.16293e-15
BC005537	5.55e-17	3.16293e-15
Acot13	5.55e-17	3.16293e-15
Uqcrfs1	5.55e-17	3.16293e-15
Serpinb1a	5.55e-17	3.16293e-15
Serpinb6a	5.55e-17	3.16293e-15
Tubb2a	5.55e-17	3.16293e-15
Tubb2b	5.55e-17	3.16293e-15
Ly86	5.55e-17	3.16293e-15
Ssr1	5.55e-17	3.16293e-15
Txndc5	5.55e-17	3.16293e-15
Aspn	5.55e-17	3.16293e-15
Cks2	5.55e-17	3.16293e-15
Gadd45g	5.55e-17	3.16293e-15
Prelid1	5.55e-17	3.16293e-15
Dbn1	5.55e-17	3.16293e-15
Pdlim7	5.55e-17	3.16293e-15
Tmed9	5.55e-17	3.16293e-15
Tgfbi	5.55e-17	3.16293e-15
Hnrnpk	5.55e-17	3.16293e-15
Ctla2a	5.55e-17	3.16293e-15
Aopep	5.55e-17	3.16293e-15
Ctsl	5.55e-17	3.16293e-15
Uqcrb	5.55e-17	3.16293e-15
Ndufs6	5.55e-17	3.16293e-15
Clptm1l	5.55e-17	3.16293e-15
Sdha	5.55e-17	3.16293e-15
Ftl1-ps1	5.55e-17	3.16293e-15
Cox7c	5.55e-17	3.16293e-15
Vcan	5.55e-17	3.16293e-15
Tmem167	5.55e-17	3.16293e-15
Rps23	5.55e-17	3.16293e-15
Ckmt2	5.55e-17	3.16293e-15
Lhfpl2	5.55e-17	3.16293e-15
Hexb	5.55e-17	3.16293e-15
Btf3	5.55e-17	3.16293e-15
Map1b	5.55e-17	3.16293e-15
Il6st	5.55e-17	3.16293e-15
Gpx8	5.55e-17	3.16293e-15
Flnb	5.55e-17	3.16293e-15
Rpl15	5.55e-17	3.16293e-15
Gng2	5.55e-17	3.16293e-15
Anxa7	5.55e-17	3.16293e-15
Rps24	5.55e-17	3.16293e-15
Arf4	5.55e-17	3.16293e-15
Lrtm1	5.55e-17	3.16293e-15
Tkt	5.55e-17	3.16293e-15
Prkcd	5.55e-17	3.16293e-15
Glt8d1	5.55e-17	3.16293e-15
Stab1	5.55e-17	3.16293e-15
Nisch	5.55e-17	3.16293e-15
Tnnc1	5.55e-17	3.16293e-15
Ldb3	5.55e-17	3.16293e-15
Lgals3	5.55e-17	3.16293e-15
Pnp	5.55e-17	3.16293e-15
Rnase4	5.55e-17	3.16293e-15
Ndrg2	5.55e-17	3.16293e-15
Arhgef40	5.55e-17	3.16293e-15
Dad1	5.55e-17	3.16293e-15
Mrpl52	5.55e-17	3.16293e-15
Myh6	5.55e-17	3.16293e-15
Myh7	5.55e-17	3.16293e-15
Fitm1	5.55e-17	3.16293e-15
Phf11b	5.55e-17	3.16293e-15
Ctsb	5.55e-17	3.16293e-15
Clu	5.55e-17	3.16293e-15
Loxl2	5.55e-17	3.16293e-15
Bmp1	5.55e-17	3.16293e-15
Itm2b	5.55e-17	3.16293e-15
Esd	5.55e-17	3.16293e-15
Lcp1	5.55e-17	3.16293e-15
Tpt1	5.55e-17	3.16293e-15
Gm10076	5.55e-17	3.16293e-15
Dnajc3	5.55e-17	3.16293e-15
Selenop	5.55e-17	3.16293e-15
Oxct1	5.55e-17	3.16293e-15
Rpl37	5.55e-17	3.16293e-15
Dab2	5.55e-17	3.16293e-15
Osmr	5.55e-17	3.16293e-15
Basp1	5.55e-17	3.16293e-15
Otulinl	5.55e-17	3.16293e-15
Dap	5.55e-17	3.16293e-15
Cct5	5.55e-17	3.16293e-15
Snhg18	5.55e-17	3.16293e-15
Rpl30	5.55e-17	3.16293e-15
Cox6c	5.55e-17	3.16293e-15
Pabpc1	5.55e-17	3.16293e-15
Ywhaz	5.55e-17	3.16293e-15
Cthrc1	5.55e-17	3.16293e-15
Col14a1	5.55e-17	3.16293e-15
Ndufb9	5.55e-17	3.16293e-15
Ccn4	5.55e-17	3.16293e-15
Ly6e	5.55e-17	3.16293e-15
Ly6a	5.55e-17	3.16293e-15
Ly6c2	5.55e-17	3.16293e-15
Plec	5.55e-17	3.16293e-15
Cyc1	5.55e-17	3.16293e-15
Rpl8	5.55e-17	3.16293e-15
Mb	5.55e-17	3.16293e-15
Myh9	5.55e-17	3.16293e-15
Eif3d	5.55e-17	3.16293e-15
Ncf4	5.55e-17	3.16293e-15
Kctd17	5.55e-17	3.16293e-15
C1qtnf6	5.55e-17	3.16293e-15
Rac2	5.55e-17	3.16293e-15
Cyth4	5.55e-17	3.16293e-15
Lgals1	5.55e-17	3.16293e-15
Kdelr3	5.55e-17	3.16293e-15
Ddx17	5.55e-17	3.16293e-15
Rpl3	5.55e-17	3.16293e-15
Atf4	5.55e-17	3.16293e-15
Rangap1	5.55e-17	3.16293e-15
Aco2	5.55e-17	3.16293e-15
Ndufa6	5.55e-17	3.16293e-15
Cyb5r3	5.55e-17	3.16293e-15
Arfgap3	5.55e-17	3.16293e-15
Tspo	5.55e-17	3.16293e-15
Fbln1	5.55e-17	3.16293e-15
Atxn10	5.55e-17	3.16293e-15
Creld2	5.55e-17	3.16293e-15
Plxnb2	5.55e-17	3.16293e-15
Slc38a2	5.55e-17	3.16293e-15
Slc48a1	5.55e-17	3.16293e-15
Pfkm	5.55e-17	3.16293e-15
Fkbp11	5.55e-17	3.16293e-15
Tuba1b	5.55e-17	3.16293e-15
Tuba1a	5.55e-17	3.16293e-15
Tuba1c	5.55e-17	3.16293e-15
Eif4b	5.55e-17	3.16293e-15
Prr13	5.55e-17	3.16293e-15
Pcbp2	5.55e-17	3.16293e-15
Hnrnpa1	5.55e-17	3.16293e-15
Copz1	5.55e-17	3.16293e-15
Itga5	5.55e-17	3.16293e-15
Nckap1l	5.55e-17	3.16293e-15
Srl	5.55e-17	3.16293e-15
Carhsp1	5.55e-17	3.16293e-15
Litaf	5.55e-17	3.16293e-15
Zc3h7a	5.55e-17	3.16293e-15
Cebpd	5.55e-17	3.16293e-15
Scarf2	5.55e-17	3.16293e-15
Ranbp1	5.55e-17	3.16293e-15
Ap2m1	5.55e-17	3.16293e-15
Rtp4	5.55e-17	3.16293e-15
Nrros	5.55e-17	3.16293e-15
Rpl35a	5.55e-17	3.16293e-15
Heg1	5.55e-17	3.16293e-15
Itgb5	5.55e-17	3.16293e-15
Pdia5	5.55e-17	3.16293e-15
Hcls1	5.55e-17	3.16293e-15
Ndufb4	5.55e-17	3.16293e-15
Fstl1	5.55e-17	3.16293e-15
Tmem39a	5.55e-17	3.16293e-15
Ccdc80	5.55e-17	3.16293e-15
Phldb2	5.55e-17	3.16293e-15
Cd47	5.55e-17	3.16293e-15
Rpl24	5.55e-17	3.16293e-15
Tmem45a	5.55e-17	3.16293e-15
Col8a1	5.55e-17	3.16293e-15
Btg3	5.55e-17	3.16293e-15
Atp5j	5.55e-17	3.16293e-15
App	5.55e-17	3.16293e-15
Cct8	5.55e-17	3.16293e-15
Atp5o	5.55e-17	3.16293e-15
Rcan1	5.55e-17	3.16293e-15
Runx1	5.55e-17	3.16293e-15
Hmgn1	5.55e-17	3.16293e-15
Fndc1	5.55e-17	3.16293e-15
Mpc1	5.55e-17	3.16293e-15
Tcp1	5.55e-17	3.16293e-15
Sod2	5.55e-17	3.16293e-15
Thbs2	5.55e-17	3.16293e-15
Tnfrsf12a	5.55e-17	3.16293e-15
Atp6v0c	5.55e-17	3.16293e-15
Eci1	5.55e-17	3.16293e-15
Traf7	5.55e-17	3.16293e-15
Pkd1	5.55e-17	3.16293e-15
Rps2	5.55e-17	3.16293e-15
Snhg9	5.55e-17	3.16293e-15
Ndufb10	5.55e-17	3.16293e-15
Rpl3l	5.55e-17	3.16293e-15
Ube2i	5.55e-17	3.16293e-15
Mcrip2	5.55e-17	3.16293e-15
Atp6v0e	5.55e-17	3.16293e-15
Rps10	5.55e-17	3.16293e-15
Rpl10a	5.55e-17	3.16293e-15
Srsf3	5.55e-17	3.16293e-15
Cdkn1a	5.55e-17	3.16293e-15
Pi16	5.55e-17	3.16293e-15
Mtch1	5.55e-17	3.16293e-15
Ndufv3	5.55e-17	3.16293e-15
Adamts10	5.55e-17	3.16293e-15
Myo1f	5.55e-17	3.16293e-15
Hnrnpm	5.55e-17	3.16293e-15
Angptl4	5.55e-17	3.16293e-15
Rps28	5.55e-17	3.16293e-15
Ndufa7	5.55e-17	3.16293e-15
Tapbp	5.55e-17	3.16293e-15
Rps18	5.55e-17	3.16293e-15
H2-K1	5.55e-17	3.16293e-15
Slc39a7	5.55e-17	3.16293e-15
Tap1	5.55e-17	3.16293e-15
H2-Ab1	5.55e-17	3.16293e-15
H2-Eb1	5.55e-17	3.16293e-15
Gpsm3	5.55e-17	3.16293e-15
Cfb	5.55e-17	3.16293e-15
1110038B12Rik	5.55e-17	3.16293e-15
Clic1	5.55e-17	3.16293e-15
Aif1	5.55e-17	3.16293e-15
Lst1	5.55e-17	3.16293e-15
Ddx39b	5.55e-17	3.16293e-15
H2-D1	5.55e-17	3.16293e-15
Ier3	5.55e-17	3.16293e-15
Flot1	5.55e-17	3.16293e-15
Tubb5	5.55e-17	3.16293e-15
Ppp1r18	5.55e-17	3.16293e-15
Gm42418	5.55e-17	3.16293e-15
Pla2g7	5.55e-17	3.16293e-15
Hsp90ab1	5.55e-17	3.16293e-15
Tomm6	5.55e-17	3.16293e-15
Trem2	5.55e-17	3.16293e-15
Mydgf	5.55e-17	3.16293e-15
Uhrf1	5.55e-17	3.16293e-15
Ptprs	5.55e-17	3.16293e-15
C3	5.55e-17	3.16293e-15
Vav1	5.55e-17	3.16293e-15
Adgre1	5.55e-17	3.16293e-15
Man2a1	5.55e-17	3.16293e-15
Ndufv2	5.55e-17	3.16293e-15
Myl12b	5.55e-17	3.16293e-15
Zfp36l2	5.55e-17	3.16293e-15
Mcfd2	5.55e-17	3.16293e-15
Calm2	5.55e-17	3.16293e-15
Snrpd1	5.55e-17	3.16293e-15
Riok3	5.55e-17	3.16293e-15
Slc39a6	5.55e-17	3.16293e-15
Bin1	5.55e-17	3.16293e-15
Nrep	5.55e-17	3.16293e-15
Ecscr	5.55e-17	3.16293e-15
Ndufa2	5.55e-17	3.16293e-15
Pcdh1	5.55e-17	3.16293e-15
Ndfip1	5.55e-17	3.16293e-15
Dpysl3	5.55e-17	3.16293e-15
Eif1a	5.55e-17	3.16293e-15
Ap3s1	5.55e-17	3.16293e-15
Lox	5.55e-17	3.16293e-15
Ppic	5.55e-17	3.16293e-15
Synpo	5.55e-17	3.16293e-15
Rps14	5.55e-17	3.16293e-15
Cd74	5.55e-17	3.16293e-15
Csf1r	5.55e-17	3.16293e-15
Nars	5.55e-17	3.16293e-15
Sec11c	5.55e-17	3.16293e-15
Tubb6	5.55e-17	3.16293e-15
Acaa2	5.55e-17	3.16293e-15
Rpl17	5.55e-17	3.16293e-15
Atp5a1	5.55e-17	3.16293e-15
Cndp2	5.55e-17	3.16293e-15
Tcirg1	5.55e-17	3.16293e-15
Unc93b1	5.55e-17	3.16293e-15
Ndufv1	5.55e-17	3.16293e-15
Ppp1ca	5.55e-17	3.16293e-15
Pold4	5.55e-17	3.16293e-15
Grk2	5.55e-17	3.16293e-15
Cd248	5.55e-17	3.16293e-15
Efemp2	5.55e-17	3.16293e-15
Cfl1	5.55e-17	3.16293e-15
Sipa1	5.55e-17	3.16293e-15
Ehbp1l1	5.55e-17	3.16293e-15
Ltbp3	5.55e-17	3.16293e-15
Neat1	5.55e-17	3.16293e-15
Fau	5.55e-17	3.16293e-15
Ppp1r14b	5.55e-17	3.16293e-15
Vegfb	5.55e-17	3.16293e-15
Fermt3	5.55e-17	3.16293e-15
Slc3a2	5.55e-17	3.16293e-15
Snhg1	5.55e-17	3.16293e-15
Stx5a	5.55e-17	3.16293e-15
Eef1g	5.55e-17	3.16293e-15
Ahnak	5.55e-17	3.16293e-15
Incenp	5.55e-17	3.16293e-15
Fth1	5.55e-17	3.16293e-15
Rab3il1	5.55e-17	3.16293e-15
Fads3	5.55e-17	3.16293e-15
Ddb1	5.55e-17	3.16293e-15
Vps37c	5.55e-17	3.16293e-15
Ms4a7	5.55e-17	3.16293e-15
Ms4a6c	5.55e-17	3.16293e-15
Ms4a6b	5.55e-17	3.16293e-15
Ms4a6d	5.55e-17	3.16293e-15
Mpeg1	5.55e-17	3.16293e-15
Ostf1	5.55e-17	3.16293e-15
Anxa1	5.55e-17	3.16293e-15
Gda	5.55e-17	3.16293e-15
Il33	5.55e-17	3.16293e-15
Papss2	5.55e-17	3.16293e-15
Acta2	5.55e-17	3.16293e-15
Lipa	5.55e-17	3.16293e-15
Ifit3	5.55e-17	3.16293e-15
Ankrd1	5.55e-17	3.16293e-15
Myof	5.55e-17	3.16293e-15
Pdlim1	5.55e-17	3.16293e-15
Tm9sf3	5.55e-17	3.16293e-15
Pgam1	5.55e-17	3.16293e-15
Got1	5.55e-17	3.16293e-15
Scd2	5.55e-17	3.16293e-15
Ndufb8	5.55e-17	3.16293e-15
Kcnip2	5.55e-17	3.16293e-15
Atp5md	5.55e-17	3.16293e-15
Eif3a	5.55e-17	3.16293e-15
Plp2	5.55e-17	3.16293e-15
Praf2	5.55e-17	3.16293e-15
Rbm3	5.55e-17	3.16293e-15
Cybb	5.55e-17	3.16293e-15
Atp6ap2	5.55e-17	3.16293e-15
Ndufb11	5.55e-17	3.16293e-15
Cfp	5.55e-17	3.16293e-15
Rpl39	5.55e-17	3.16293e-15
Ndufa1	5.55e-17	3.16293e-15
Lamp2	5.55e-17	3.16293e-15
Apln	5.55e-17	3.16293e-15
Fhl1	5.55e-17	3.16293e-15
Bgn	5.55e-17	3.16293e-15
Ssr4	5.55e-17	3.16293e-15
Flna	5.55e-17	3.16293e-15
Rpl10	5.55e-17	3.16293e-15
Pls3	5.55e-17	3.16293e-15
Maged1	5.55e-17	3.16293e-15
Msn	5.55e-17	3.16293e-15
Nono	5.55e-17	3.16293e-15
Ogt	5.55e-17	3.16293e-15
Rps4x	5.55e-17	3.16293e-15
Xist	5.55e-17	3.16293e-15
Cox7b	5.55e-17	3.16293e-15
Pgk1	5.55e-17	3.16293e-15
Sh3bgrl	5.55e-17	3.16293e-15
Srpx2	5.55e-17	3.16293e-15
Rpl36a	5.55e-17	3.16293e-15
Armcx2	5.55e-17	3.16293e-15
Tceal8	5.55e-17	3.16293e-15
Tceal9	5.55e-17	3.16293e-15
Morf4l2	5.55e-17	3.16293e-15
Maged2	5.55e-17	3.16293e-15
Sat1	5.55e-17	3.16293e-15
Prdx4	5.55e-17	3.16293e-15
Asb11	5.55e-17	3.16293e-15
Tmsb4x	5.55e-17	3.16293e-15
Gm47283	5.55e-17	3.16293e-15
mt-Co2	5.55e-17	3.16293e-15
mt-Atp8	5.55e-17	3.16293e-15
mt-Atp6	5.55e-17	3.16293e-15
mt-Nd3	5.55e-17	3.16293e-15
mt-Nd4l	5.55e-17	3.16293e-15
mt-Nd5	5.55e-17	3.16293e-15
AC149090.1	5.55e-17	3.16293e-15
Actr1b	1.11022e-16	5.66841e-15
Slc40a1	1.11022e-16	5.66841e-15
Fn1	1.11022e-16	5.66841e-15
Ptprn	1.11022e-16	5.66841e-15
Gmppa	1.11022e-16	5.66841e-15
Ptprc	1.11022e-16	5.66841e-15
Cfh	1.11022e-16	5.66841e-15
Tor1aip2	1.11022e-16	5.66841e-15
Nmt2	1.11022e-16	5.66841e-15
Swi5	1.11022e-16	5.66841e-15
Ssrp1	1.11022e-16	5.66841e-15
Abhd12	1.11022e-16	5.66841e-15
Map1lc3a	1.11022e-16	5.66841e-15
Ergic3	1.11022e-16	5.66841e-15
Arfgap1	1.11022e-16	5.66841e-15
Rgs19	1.11022e-16	5.66841e-15
Cks1b	1.11022e-16	5.66841e-15
Sec24d	1.11022e-16	5.66841e-15
Pdlim5	1.11022e-16	5.66841e-15
Srsf11	1.11022e-16	5.66841e-15
Lyn	1.11022e-16	5.66841e-15
Ddx58	1.11022e-16	5.66841e-15
Creb3	1.11022e-16	5.66841e-15
Abca1	1.11022e-16	5.66841e-15
Nasp	1.11022e-16	5.66841e-15
Ybx1	1.11022e-16	5.66841e-15
Fhl3	1.11022e-16	5.66841e-15
Eva1b	1.11022e-16	5.66841e-15
Thrap3	1.11022e-16	5.66841e-15
Marcksl1	1.11022e-16	5.66841e-15
Clic4	1.11022e-16	5.66841e-15
Micos10	1.11022e-16	5.66841e-15
Tardbp	1.11022e-16	5.66841e-15
Rer1	1.11022e-16	5.66841e-15
Cdk11b	1.11022e-16	5.66841e-15
Ssu72	1.11022e-16	5.66841e-15
Sri	1.11022e-16	5.66841e-15
Dnajb6	1.11022e-16	5.66841e-15
Spon2	1.11022e-16	5.66841e-15
Add1	1.11022e-16	5.66841e-15
Fam114a1	1.11022e-16	5.66841e-15
Rpl9	1.11022e-16	5.66841e-15
Tmem165	1.11022e-16	5.66841e-15
Tmem119	1.11022e-16	5.66841e-15
Ncor2	1.11022e-16	5.66841e-15
Eif4h	1.11022e-16	5.66841e-15
Map11	1.11022e-16	5.66841e-15
Bri3	1.11022e-16	5.66841e-15
Arpc1a	1.11022e-16	5.66841e-15
Col1a2	1.11022e-16	5.66841e-15
Snd1	1.11022e-16	5.66841e-15
Nod1	1.11022e-16	5.66841e-15
Mogs	1.11022e-16	5.66841e-15
Clec4a1	1.11022e-16	5.66841e-15
Ndufa9	1.11022e-16	5.66841e-15
Clec2d	1.11022e-16	5.66841e-15
Bcat1	1.11022e-16	5.66841e-15
Gm15543	1.11022e-16	5.66841e-15
Bckdha	1.11022e-16	5.66841e-15
Fbl	1.11022e-16	5.66841e-15
Rras	1.11022e-16	5.66841e-15
Arrb1	1.11022e-16	5.66841e-15
Rrm1	1.11022e-16	5.66841e-15
Timm10b	1.11022e-16	5.66841e-15
Scgb1c1	1.11022e-16	5.66841e-15
H19	1.11022e-16	5.66841e-15
Arglu1	1.11022e-16	5.66841e-15
Tfdp1	1.11022e-16	5.66841e-15
Adgra2	1.11022e-16	5.66841e-15
Fkbp8	1.11022e-16	5.66841e-15
Mylk3	1.11022e-16	5.66841e-15
Coq9	1.11022e-16	5.66841e-15
Irf8	1.11022e-16	5.66841e-15
Rhou	1.11022e-16	5.66841e-15
Endod1	1.11022e-16	5.66841e-15
S1pr2	1.11022e-16	5.66841e-15
Slc44a2	1.11022e-16	5.66841e-15
Mir100hg	1.11022e-16	5.66841e-15
Sidt2	1.11022e-16	5.66841e-15
Snx1	1.11022e-16	5.66841e-15
Nedd4	1.11022e-16	5.66841e-15
Myo5a	1.11022e-16	5.66841e-15
Ubp1	1.11022e-16	5.66841e-15
Cmtm7	1.11022e-16	5.66841e-15
Abracl	1.11022e-16	5.66841e-15
Gpx4	1.11022e-16	5.66841e-15
Tmpo	1.11022e-16	5.66841e-15
Nab2	1.11022e-16	5.66841e-15
Mtfp1	1.11022e-16	5.66841e-15
Dbnl	1.11022e-16	5.66841e-15
9530068E07Rik	1.11022e-16	5.66841e-15
Sparc	1.11022e-16	5.66841e-15
Obscn	1.11022e-16	5.66841e-15
Rnasek	1.11022e-16	5.66841e-15
Slc43a2	1.11022e-16	5.66841e-15
Zfp207	1.11022e-16	5.66841e-15
Col1a1	1.11022e-16	5.66841e-15
Ube2z	1.11022e-16	5.66841e-15
Smarcd2	1.11022e-16	5.66841e-15
Mxra7	1.11022e-16	5.66841e-15
Mcrip1	1.11022e-16	5.66841e-15
Aspscr1	1.11022e-16	5.66841e-15
Cybc1	1.11022e-16	5.66841e-15
Metrnl	1.11022e-16	5.66841e-15
Evl	1.11022e-16	5.66841e-15
Mylk4	1.11022e-16	5.66841e-15
Tspan17	1.11022e-16	5.66841e-15
Cmya5	1.11022e-16	5.66841e-15
Srek1	1.11022e-16	5.66841e-15
Pdhb	1.11022e-16	5.66841e-15
Nid2	1.11022e-16	5.66841e-15
Synpo2l	1.11022e-16	5.66841e-15
Comtd1	1.11022e-16	5.66841e-15
Mustn1	1.11022e-16	5.66841e-15
Sucla2	1.11022e-16	5.66841e-15
Rai14	1.11022e-16	5.66841e-15
Derl1	1.11022e-16	5.66841e-15
Eef1d	1.11022e-16	5.66841e-15
Eif3l	1.11022e-16	5.66841e-15
Nup50	1.11022e-16	5.66841e-15
5031439G07Rik	1.11022e-16	5.66841e-15
Twf1	1.11022e-16	5.66841e-15
Fmnl3	1.11022e-16	5.66841e-15
Myh11	1.11022e-16	5.66841e-15
Popdc2	1.11022e-16	5.66841e-15
Srrm2	1.11022e-16	5.66841e-15
Rgl2	1.11022e-16	5.66841e-15
H2-Aa	1.11022e-16	5.66841e-15
Atf6b	1.11022e-16	5.66841e-15
Ehmt2	1.11022e-16	5.66841e-15
Vars	1.11022e-16	5.66841e-15
H2-T23	1.11022e-16	5.66841e-15
Srsf7	1.11022e-16	5.66841e-15
Tmem173	1.11022e-16	5.66841e-15
Prrc1	1.11022e-16	5.66841e-15
Pdgfrb	1.11022e-16	5.66841e-15
Doc2g	1.11022e-16	5.66841e-15
Sf1	1.11022e-16	5.66841e-15
Hnrnpul2	1.11022e-16	5.66841e-15
Ganab	1.11022e-16	5.66841e-15
Nfkb2	1.11022e-16	5.66841e-15
Sfr1	1.11022e-16	5.66841e-15
Prdx3	1.11022e-16	5.66841e-15
Uba1	1.11022e-16	5.66841e-15
Timp1	1.11022e-16	5.66841e-15
Gpm6b	1.11022e-16	5.66841e-15
mt-Nd1	1.11022e-16	5.66841e-15
mt-Nd2	1.11022e-16	5.66841e-15
mt-Co1	1.11022e-16	5.66841e-15
mt-Co3	1.11022e-16	5.66841e-15
mt-Nd4	1.11022e-16	5.66841e-15
mt-Cytb	1.11022e-16	5.66841e-15
Casp8	2.22045e-16	1.08111e-14
Sp100	2.22045e-16	1.08111e-14
Itm2c	2.22045e-16	1.08111e-14
Ndufa10	2.22045e-16	1.08111e-14
Rab7b	2.22045e-16	1.08111e-14
Rnpep	2.22045e-16	1.08111e-14
Igsf8	2.22045e-16	1.08111e-14
Cd302	2.22045e-16	1.08111e-14
Rbms1	2.22045e-16	1.08111e-14
Grb14	2.22045e-16	1.08111e-14
Rpl22l1	2.22045e-16	1.08111e-14
Csf1	2.22045e-16	1.08111e-14
Gclm	2.22045e-16	1.08111e-14
Ndufb6	2.22045e-16	1.08111e-14
Cpt2	2.22045e-16	1.08111e-14
Cdc20	2.22045e-16	1.08111e-14
Tmem50a	2.22045e-16	1.08111e-14
Ubr4	2.22045e-16	1.08111e-14
Hnrnpdl	2.22045e-16	1.08111e-14
Gltp	2.22045e-16	1.08111e-14
Ankrd13a	2.22045e-16	1.08111e-14
Tesc	2.22045e-16	1.08111e-14
Tmed2	2.22045e-16	1.08111e-14
Il17ra	2.22045e-16	1.08111e-14
Ppp1r12c	2.22045e-16	1.08111e-14
Arhgef1	2.22045e-16	1.08111e-14
Psmc4	2.22045e-16	1.08111e-14
Prcp	2.22045e-16	1.08111e-14
Gprc5b	2.22045e-16	1.08111e-14
Cd81	2.22045e-16	1.08111e-14
Comp	2.22045e-16	1.08111e-14
Ndufb7	2.22045e-16	1.08111e-14
Gm31659	2.22045e-16	1.08111e-14
Clk3	2.22045e-16	1.08111e-14
Sema7a	2.22045e-16	1.08111e-14
Rab8b	2.22045e-16	1.08111e-14
Plod2	2.22045e-16	1.08111e-14
Nktr	2.22045e-16	1.08111e-14
Fuca2	2.22045e-16	1.08111e-14
Txlnb	2.22045e-16	1.08111e-14
Epb41l2	2.22045e-16	1.08111e-14
Snx3	2.22045e-16	1.08111e-14
Cisd1	2.22045e-16	1.08111e-14
Bcr	2.22045e-16	1.08111e-14
Mbd3	2.22045e-16	1.08111e-14
Coq10a	2.22045e-16	1.08111e-14
Mpdu1	2.22045e-16	1.08111e-14
Txndc17	2.22045e-16	1.08111e-14
Ift20	2.22045e-16	1.08111e-14
Zfp36l1	2.22045e-16	1.08111e-14
Dlst	2.22045e-16	1.08111e-14
F13a1	2.22045e-16	1.08111e-14
Lman2	2.22045e-16	1.08111e-14
Hnrnpa0	2.22045e-16	1.08111e-14
Gnl3	2.22045e-16	1.08111e-14
Tep1	2.22045e-16	1.08111e-14
Nedd8	2.22045e-16	1.08111e-14
Azin1	2.22045e-16	1.08111e-14
Tmem184b	2.22045e-16	1.08111e-14
Rbx1	2.22045e-16	1.08111e-14
Arf3	2.22045e-16	1.08111e-14
Mfsd5	2.22045e-16	1.08111e-14
Vasn	2.22045e-16	1.08111e-14
Sh3gl1	2.22045e-16	1.08111e-14
Rab31	2.22045e-16	1.08111e-14
Lmnb1	2.22045e-16	1.08111e-14
Atl3	2.22045e-16	1.08111e-14
Pprc1	2.22045e-16	1.08111e-14
Csf2ra	2.22045e-16	1.08111e-14
Armcx3	2.22045e-16	1.08111e-14
Smc1a	2.22045e-16	1.08111e-14
Ddit4	4.44089e-16	2.15658e-14
Pofut2	4.44089e-16	2.15658e-14
Aoc3	4.44089e-16	2.15658e-14
Idh3g	4.44089e-16	2.15658e-14
Clk1	5.55112e-16	2.68349e-14
Dhx15	5.55112e-16	2.68349e-14
Fgfr1	5.55112e-16	2.68349e-14
Ap3d1	5.55112e-16	2.68349e-14
Pck2	5.55112e-16	2.68349e-14
Bak1	5.55112e-16	2.68349e-14
Rpl9-ps6	5.55112e-16	2.68349e-14
Anapc2	6.66134e-16	3.20563e-14
Set	6.66134e-16	3.20563e-14
Magoh	6.66134e-16	3.20563e-14
Fkbp14	6.66134e-16	3.20563e-14
Pmp22	6.66134e-16	3.20563e-14
Cerk	6.66134e-16	3.20563e-14
Rps6ka3	6.66134e-16	3.20563e-14
Eif4e2	7.77156e-16	3.73027e-14
Nos3	7.77156e-16	3.73027e-14
Esyt2	7.77156e-16	3.73027e-14
Acsl4	7.77156e-16	3.73027e-14
Nrp2	8.88178e-16	4.21432e-14
F11r	8.88178e-16	4.21432e-14
Cdk9	8.88178e-16	4.21432e-14
Nckap1	8.88178e-16	4.21432e-14
Helz2	8.88178e-16	4.21432e-14
Ccl21a	8.88178e-16	4.21432e-14
Sdf4	8.88178e-16	4.21432e-14
Polr1d	8.88178e-16	4.21432e-14
Pon2	8.88178e-16	4.21432e-14
Cebpa	8.88178e-16	4.21432e-14
Prc1	8.88178e-16	4.21432e-14
Nucb2	8.88178e-16	4.21432e-14
Naglu	8.88178e-16	4.21432e-14
Csnk1d	8.88178e-16	4.21432e-14
Pkp2	8.88178e-16	4.21432e-14
Psmb8	8.88178e-16	4.21432e-14
Lsm2	8.88178e-16	4.21432e-14
Pdha1	8.88178e-16	4.21432e-14
Vapa	9.99201e-16	4.7381e-14
Atf3	1.11022e-15	5.2379e-14
Cebpb	1.11022e-15	5.2379e-14
Snhg12	1.11022e-15	5.2379e-14
Tmem263	1.11022e-15	5.2379e-14
Cct2	1.11022e-15	5.2379e-14
Trim25	1.11022e-15	5.2379e-14
Gngt2	1.11022e-15	5.2379e-14
Psmb1	1.11022e-15	5.2379e-14
Samhd1	1.33227e-15	6.25381e-14
Cox19	1.33227e-15	6.25381e-14
Cnbp	1.33227e-15	6.25381e-14
Coq8b	1.33227e-15	6.25381e-14
Uba2	1.33227e-15	6.25381e-14
Slc29a3	1.33227e-15	6.25381e-14
Snrpd3	1.33227e-15	6.25381e-14
Acsl5	1.33227e-15	6.25381e-14
Cct7	1.44329e-15	6.76219e-14
Phf23	1.44329e-15	6.76219e-14
Fam120a	1.44329e-15	6.76219e-14
Nucb1	1.55431e-15	7.26409e-14
Chmp1a	1.55431e-15	7.26409e-14
Cxcl14	1.55431e-15	7.26409e-14
Ppil2	1.55431e-15	7.26409e-14
Folr2	1.77636e-15	8.29662e-14
Sav1	1.88738e-15	8.80964e-14
Fibin	1.9984e-15	9.31036e-14
Adarb1	1.9984e-15	9.31036e-14
Ndufs8	1.9984e-15	9.31036e-14
Phf11d	2.10942e-15	9.81533e-14
Igf2r	2.10942e-15	9.81533e-14
Nagk	2.22045e-15	1.0319e-13
Ndrg4	2.22045e-15	1.0319e-13
Fxyd6	2.44249e-15	1.13298e-13
Ripk3	2.44249e-15	1.13298e-13
Sh3pxd2a	2.44249e-15	1.13298e-13
Nsd2	2.55351e-15	1.18227e-13
Ergic2	2.55351e-15	1.18227e-13
Laptm4a	2.55351e-15	1.18227e-13
Alyref	2.66454e-15	1.23291e-13
Sec13	2.9976e-15	1.3853e-13
Plaat3	2.9976e-15	1.3853e-13
Nup153	3.10862e-15	1.43572e-13
Dgkz	3.33067e-15	1.53352e-13
Selenot	3.33067e-15	1.53352e-13
Sfpq	3.33067e-15	1.53352e-13
Slc16a3	3.33067e-15	1.53352e-13
Vcl	3.33067e-15	1.53352e-13
Aplnr	3.44169e-15	1.58366e-13
Ndufs7	3.55271e-15	1.63373e-13
Vamp3	3.66374e-15	1.68167e-13
Ogn	3.66374e-15	1.68167e-13
Ephx2	3.66374e-15	1.68167e-13
Rsrc2	3.77476e-15	1.7305e-13
Stat2	3.77476e-15	1.7305e-13
Plpp5	3.88578e-15	1.78031e-13
Dync1i2	3.9968e-15	1.83005e-13
Sulf2	4.10783e-15	1.87627e-13
Numbl	4.10783e-15	1.87627e-13
Spns2	4.10783e-15	1.87627e-13
Arhgap23	4.10783e-15	1.87627e-13
Nras	4.21885e-15	1.92462e-13
Psmb5	4.21885e-15	1.92462e-13
Zswim8	4.32987e-15	1.97286e-13
Mbd2	4.32987e-15	1.97286e-13
Nab1	4.66294e-15	2.11943e-13
Atp8b2	4.66294e-15	2.11943e-13
Banf1	4.66294e-15	2.11943e-13
Actr1a	4.66294e-15	2.11943e-13
Apbb1ip	4.88498e-15	2.21765e-13
Itsn2	4.88498e-15	2.21765e-13
Ubap2l	5.10703e-15	2.31563e-13
Tmem43	5.10703e-15	2.31563e-13
Slc6a8	5.32907e-15	2.41485e-13
Cars	5.66214e-15	2.56421e-13
Dnajb11	5.77316e-15	2.61291e-13
Slc30a7	6.21725e-15	2.81049e-13
Puf60	6.21725e-15	2.81049e-13
Fbrs	6.43929e-15	2.9091e-13
Nav1	6.55032e-15	2.9521e-13
Gmppb	6.55032e-15	2.9521e-13
Vdac1	6.55032e-15	2.9521e-13
Gtf2f1	6.55032e-15	2.9521e-13
Pde1a	6.66134e-15	3.00032e-13
Raly	6.77236e-15	3.04664e-13
C1ra	6.77236e-15	3.04664e-13
Jak2	7.77156e-15	3.49404e-13
Elf4	8.43769e-15	3.79124e-13
Nop56	8.77076e-15	3.93852e-13
Acp2	9.10383e-15	4.08562e-13
Sar1a	9.54792e-15	4.28234e-13
Tnfaip1	9.99201e-15	4.47613e-13
Smim3	9.99201e-15	4.47613e-13
Pygb	1.02141e-14	4.57286e-13
Ifi205	1.04361e-14	4.66946e-13
Ddx3x	1.08802e-14	4.86524e-13
Fam174b	1.13243e-14	5.0517e-13
Sec11a	1.13243e-14	5.0517e-13
Taf10	1.13243e-14	5.0517e-13
Cpt1b	1.13243e-14	5.0517e-13
Fads1	1.21014e-14	5.39516e-13
Atxn7l3	1.24345e-14	5.54033e-13
Pdap1	1.26565e-14	5.6359e-13
Ugcg	1.28786e-14	5.73135e-13
Apobec3	1.37668e-14	6.12296e-13
Gm44386	1.39888e-14	6.2143e-13
Il2rg	1.39888e-14	6.2143e-13
Ehd4	1.43219e-14	6.35847e-13
Fem1b	1.5099e-14	6.69553e-13
Pbdc1	1.5099e-14	6.69553e-13
Itsn1	1.52101e-14	6.74075e-13
Slc15a3	1.55431e-14	6.88427e-13
Apobec2	1.56541e-14	6.92933e-13
Plcg2	1.76525e-14	7.80928e-13
Csnk1a1	1.77636e-14	7.85374e-13
Bcl6b	1.79856e-14	7.94719e-13
Prpf4b	1.80966e-14	7.99151e-13
Hspb8	1.84297e-14	8.13378e-13
Gatd3a	1.88738e-14	8.32484e-13
Hnrnpl	1.94289e-14	8.56463e-13
Ece1	2.04281e-14	8.99977e-13
Ptafr	2.05391e-14	9.04334e-13
Mcm7	2.08722e-14	9.17914e-13
Trim27	2.08722e-14	9.17914e-13
Pxn	2.26485e-14	9.95447e-13
5430431A17Rik	2.28706e-14	1.00461e-12
Lman1	2.33147e-14	1.02352e-12
Adamts1	2.39808e-14	1.05214e-12
Arhgap1	2.59792e-14	1.13915e-12
Krcc1	2.66454e-14	1.16767e-12
H2-Q7	2.68674e-14	1.17671e-12
G0s2	2.9865e-14	1.30646e-12
Sfxn3	2.9865e-14	1.30646e-12
Apbb1	3.10862e-14	1.35909e-12
Mpzl1	3.13083e-14	1.36719e-12
Safb2	3.13083e-14	1.36719e-12
Plscr3	3.15303e-14	1.37608e-12
Ddx39	3.21965e-14	1.40433e-12
Macrod1	3.31957e-14	1.44707e-12
Ace	3.35287e-14	1.46073e-12
Nomo1	3.41949e-14	1.48888e-12
G6pdx	3.4972e-14	1.52183e-12
Glud1	3.64153e-14	1.58371e-12
Cdh5	3.65263e-14	1.58762e-12
Rad23b	3.74145e-14	1.62527e-12
Trmt1	3.78586e-14	1.64361e-12
Cltb	3.83027e-14	1.66192e-12
Xpnpep1	4.06342e-14	1.76205e-12
Atp6v0a1	4.08562e-14	1.77065e-12
Noc2l	4.15223e-14	1.79848e-12
Wac	4.19664e-14	1.81666e-12
Fasn	4.42979e-14	1.91647e-12
Kif5b	4.45199e-14	1.92496e-12
Uba7	4.4631e-14	1.92864e-12
Dek	4.55191e-14	1.96588e-12
Sp110	4.60743e-14	1.9887e-12
Ier2	4.75175e-14	2.04981e-12
Eif2s2	5.04041e-14	2.17308e-12
Rbck1	5.05151e-14	2.1766e-12
Aen	5.06262e-14	2.18013e-12
Pgls	5.07372e-14	2.18365e-12
U2af1	5.09592e-14	2.19194e-12
Brip1os	5.21805e-14	2.24317e-12
Myl12a	5.32907e-14	2.28958e-12
Apold1	5.37348e-14	2.306e-12
Hnrnpc	5.37348e-14	2.306e-12
Ypel5	5.4845e-14	2.35229e-12
Emc10	5.63993e-14	2.41618e-12
Slc9a3r1	5.63993e-14	2.41618e-12
Rnf4	5.973e-14	2.55739e-12
Vwf	6.07292e-14	2.59868e-12
Klc1	6.09512e-14	2.60669e-12
Sec22b	6.21725e-14	2.65739e-12
Echs1	6.50591e-14	2.77918e-12
Acbd3	6.70575e-14	2.8629e-12
Brd2	7.19425e-14	3.0697e-12
Pik3cd	7.21645e-14	3.07741e-12
Gtpbp6	7.61613e-14	3.246e-12
Rps27rt	7.78266e-14	3.31508e-12
Snrpc	7.9492e-14	3.38408e-12
Pa2g4	8.41549e-14	3.58054e-12
Psma4	8.68194e-14	3.69181e-12
Fam98a	9.07052e-14	3.85484e-12
Zeb2	9.70335e-14	4.12143e-12
Psmd14	9.85878e-14	4.18507e-12
Dctn5	9.92539e-14	4.21095e-12
Jag1	1.01696e-13	4.31212e-12
Snhg8	1.0314e-13	4.37083e-12
Trafd1	1.04694e-13	4.43418e-12
Fam3c	1.08358e-13	4.58674e-12
Rps27	1.108e-13	4.68747e-12
Wdr83os	1.11022e-13	4.6942e-12
Fkbp3	1.13909e-13	4.81352e-12
Far1	1.17462e-13	4.96084e-12
Ykt6	1.3034e-13	5.50163e-12
Vwa1	1.30562e-13	5.50788e-12
Sept7	1.34781e-13	5.68264e-12
Hmgn2	1.35336e-13	5.70282e-12
Dctn4	1.37557e-13	5.79311e-12
Adprh	1.39222e-13	5.85994e-12
Ptpn1	1.48548e-13	6.24894e-12
Cyfip1	1.56763e-13	6.59083e-12
Tra2b	1.60094e-13	6.72706e-12
Hdac7	1.62981e-13	6.8445e-12
Psmb4	1.64091e-13	6.88724e-12
Gadd45b	1.64757e-13	6.91131e-12
Mndal	1.65867e-13	6.95397e-12
Acot2	1.69864e-13	7.11753e-12
Ndufs4	1.8674e-13	7.82024e-12
Lmod2	1.89515e-13	7.93202e-12
Map3k11	1.93623e-13	8.0994e-12
Dtx3	1.94289e-13	8.1227e-12
Caml	1.97842e-13	8.2666e-12
Hnrnph2	1.98286e-13	8.28051e-12
Tent2	2.03393e-13	8.48903e-12
Nsmf	2.06724e-13	8.62321e-12
Sdc4	2.10498e-13	8.77576e-12
Cib1	2.1072e-13	8.78011e-12
Id2	2.11164e-13	8.7937e-12
Ltbr	2.12497e-13	8.84424e-12
Coro6	2.17382e-13	9.0425e-12
Ttyh3	2.1827e-13	9.07438e-12
Trim30a	2.19602e-13	9.12468e-12
Mthfr	2.2371e-13	9.29019e-12
Psen1	2.27485e-13	9.44169e-12
Spg21	2.37588e-13	9.85552e-12
Ctnnd1	2.38143e-13	9.87305e-12
Gmfb	2.53686e-13	1.05116e-11
Limd2	2.639e-13	1.09288e-11
Il3ra	2.72005e-13	1.12581e-11
Trmt2a	2.77556e-13	1.14815e-11
Rps17	2.82441e-13	1.16771e-11
Klf6	2.89546e-13	1.19642e-11
Acvrl1	2.96652e-13	1.2251e-11
Trip12	3.1275e-13	1.29087e-11
Dhrs11	3.16858e-13	1.3071e-11
Macf1	3.19522e-13	1.31737e-11
Cggbp1	3.2585e-13	1.34271e-11
Cyb561	3.33511e-13	1.37352e-11
Ctps	3.35842e-13	1.38236e-11
Smchd1	3.41061e-13	1.40306e-11
Jak1	3.43725e-13	1.41324e-11
Hmgn3	3.47944e-13	1.4298e-11
Ctdsp2	3.55715e-13	1.46093e-11
Gnas	3.8225e-13	1.56904e-11
Sin3b	3.88356e-13	1.59323e-11
Slc4a2	4.09894e-13	1.68067e-11
Mpp1	4.12115e-13	1.68884e-11
Nans	4.36651e-13	1.78841e-11
Nsa2	4.56968e-13	1.87059e-11
Stx7	4.62741e-13	1.89319e-11
Ttll1	4.79727e-13	1.9616e-11
Ifnar2	4.82614e-13	1.97233e-11
Frmd8	4.90274e-13	2.00254e-11
Parp12	4.94937e-13	2.02047e-11
Chsy1	5.28355e-13	2.15571e-11
Cygb	5.31797e-13	2.16857e-11
Farp1	5.60441e-13	2.28412e-11
Slc2a1	5.75429e-13	2.34393e-11
Plk2	5.81313e-13	2.3666e-11
Tmem97	5.82867e-13	2.37163e-11
Snrpa	6.03517e-13	2.45432e-11
Pstpip1	6.18283e-13	2.513e-11
Rab4b	6.2228e-13	2.52786e-11
Ppfibp1	6.30829e-13	2.56119e-11
Dnm2	6.51035e-13	2.64179e-11
Psmc3	6.64135e-13	2.69349e-11
Cdr2	6.73683e-13	2.73072e-11
Ldha	6.83009e-13	2.76702e-11
Smim15	7.02771e-13	2.84553e-11
Rasl11b	7.10765e-13	2.87634e-11
Lrp10	7.13207e-13	2.88466e-11
Icam2	7.1565e-13	2.89297e-11
Xpo1	7.28528e-13	2.94343e-11
Lrg1	7.38076e-13	2.98039e-11
Gng12	7.4718e-13	3.01552e-11
Rfc2	7.53397e-13	3.03897e-11
Dpp3	7.54397e-13	3.04135e-11
Ube2m	7.54952e-13	3.04194e-11
Srp14	7.59171e-13	3.05729e-11
Snx8	7.69607e-13	3.09764e-11
Plat	7.75047e-13	3.11786e-11
Nfe2l2	7.91811e-13	3.18358e-11
Gm31251	7.94698e-13	3.19346e-11
Tmed10	8.03579e-13	3.22741e-11
G3bp2	8.2867e-13	3.32639e-11
Matn2	8.31779e-13	3.33708e-11
Sec23b	8.3622e-13	3.35309e-11
Pdlim3	8.44214e-13	3.38332e-11
Gm26532	8.51541e-13	3.41085e-11
Smpx	8.73301e-13	3.49614e-11
Syk	8.85403e-13	3.54268e-11
Naalad2	9.14602e-13	3.65755e-11
Diaph1	9.29035e-13	3.71327e-11
Srsf9	9.39693e-13	3.75386e-11
Luc7l2	9.46576e-13	3.77933e-11
Rnps1	9.56346e-13	3.81629e-11
Cdr2l	1.00253e-12	3.99846e-11
Chst12	1.01996e-12	4.0658e-11
Ost4	1.02851e-12	4.09769e-11
Cox17	1.08102e-12	4.3046e-11
B230219D22Rik	1.11711e-12	4.44591e-11
1110004F10Rik	1.11822e-12	4.44795e-11
Ppt1	1.16773e-12	4.64243e-11
Blmh	1.17528e-12	4.66996e-11
Srgap2	1.2681e-12	5.03339e-11
Renbp	1.2681e-12	5.03339e-11
Adar	1.27864e-12	5.07255e-11
Pros1	1.28275e-12	5.08614e-11
Ptp4a2	1.41465e-12	5.60612e-11
Gps1	1.41809e-12	5.61678e-11
Spred1	1.47171e-12	5.82608e-11
Ik	1.50302e-12	5.94686e-11
Faf2	1.53189e-12	6.05785e-11
Emc1	1.55786e-12	6.15732e-11
Mapk6	1.56508e-12	6.18257e-11
H2afy	1.6096e-12	6.35507e-11
Retreg1	1.70208e-12	6.71665e-11
Gsr	1.70686e-12	6.73011e-11
Ift46	1.7073e-12	6.73011e-11
Rell1	1.73683e-12	6.84291e-11
Ssb	1.74194e-12	6.85928e-11
Mov10	1.74283e-12	6.85928e-11
Hcfc1	1.76703e-12	6.95086e-11
Hmgb1	1.88161e-12	7.39765e-11
Ramp2	1.90847e-12	7.49933e-11
Sae1	1.97442e-12	7.75438e-11
Vwa5a	2.10032e-12	8.2445e-11
Dhrs3	2.13218e-12	8.36517e-11
Atp6ap1	2.17226e-12	8.51793e-11
Slc41a3	2.18758e-12	8.57349e-11
Gng10	2.2089e-12	8.65249e-11
Napg	2.26907e-12	8.88353e-11
Tmub2	2.28995e-12	8.96054e-11
Srp9	2.31837e-12	9.06699e-11
Cpsf6	2.33524e-12	9.1282e-11
Rasip1	2.49201e-12	9.73586e-11
Copb1	2.49822e-12	9.75504e-11
Nt5c	2.60569e-12	1.01694e-10
Sbf1	2.72871e-12	1.06439e-10
Pml	2.76568e-12	1.07824e-10
Cic	2.81353e-12	1.09633e-10
Gm20559	2.82352e-12	1.09965e-10
Kidins220	2.93354e-12	1.1419e-10
Mdm2	2.95231e-12	1.1486e-10
Ptgr1	2.98783e-12	1.16182e-10
Copb2	3.08575e-12	1.19927e-10
Arid5a	3.13016e-12	1.21589e-10
Ankfy1	3.17724e-12	1.23354e-10
Angptl2	3.23341e-12	1.25469e-10
Cmas	3.2413e-12	1.2571e-10
Ext1	3.31946e-12	1.28674e-10
Skil	3.35665e-12	1.30048e-10
Rasa3	3.36398e-12	1.30264e-10
Rtraf	3.39617e-12	1.31443e-10
Foxp1	3.54894e-12	1.37284e-10
Inppl1	3.65574e-12	1.41342e-10
Baz1b	3.68194e-12	1.42282e-10
Ldlrap1	3.86402e-12	1.4924e-10
Gpr107	3.90021e-12	1.5056e-10
Tmem258	3.91198e-12	1.50936e-10
Psmd13	4.08962e-12	1.57708e-10
Amdhd2	4.13025e-12	1.59193e-10
Tram2	4.22007e-12	1.62571e-10
B4galt3	4.27292e-12	1.64521e-10
Dazap2	4.37306e-12	1.6829e-10
Sox4	4.52349e-12	1.7399e-10
Gak	4.77218e-12	1.83461e-10
Lima1	4.86122e-12	1.86787e-10
Erp44	5.01632e-12	1.92648e-10
Hibadh	5.06017e-12	1.94232e-10
Akip1	5.10203e-12	1.95737e-10
Anapc15	5.16165e-12	1.97923e-10
Tor1b	5.17009e-12	1.98144e-10
Sirt7	5.78448e-12	2.21577e-10
Uap1l1	5.79137e-12	2.21727e-10
Rap1a	5.87319e-12	2.24744e-10
Plcb3	5.96045e-12	2.27967e-10
Tspan31	6.1009e-12	2.33218e-10
Gnai3	6.13454e-12	2.34384e-10
Mdfic	6.27676e-12	2.39695e-10
Srsf10	6.35136e-12	2.4242e-10
Zfp593	6.4464e-12	2.45921e-10
Tent5a	6.49591e-12	2.47684e-10
Dpm2	6.5763e-12	2.5062e-10
Trim28	6.83587e-12	2.60379e-10
Ift122	6.95755e-12	2.64879e-10
Slc7a6	7.14506e-12	2.71879e-10
Sdc2	7.19291e-12	2.7356e-10
Golga7	7.24865e-12	2.75539e-10
Mta2	7.30671e-12	2.77605e-10
Calm3	7.43705e-12	2.82413e-10
Mfsd10	7.60547e-12	2.88661e-10
Galnt1	7.64144e-12	2.89879e-10
Gps2	7.64744e-12	2.89959e-10
Rela	7.7145e-12	2.92353e-10
Zmat3	7.72593e-12	2.92637e-10
Arap3	7.77933e-12	2.9451e-10
Eif1	7.83862e-12	2.96604e-10
Ptpn12	8.19167e-12	3.09806e-10
Pum2	8.39795e-12	3.17446e-10
Mbnl1	8.50509e-12	3.21333e-10
Stim2	8.90199e-12	3.36158e-10
Scn1b	9.05953e-12	3.41934e-10
Cct3	9.08851e-12	3.42854e-10
Exoc5	9.21396e-12	3.47411e-10
Snx2	9.25815e-12	3.48901e-10
Irf9	9.52627e-12	3.58823e-10
Cbx5	9.58222e-12	3.60749e-10
Yipf5	9.6767e-12	3.64122e-10
Smyd1	9.7331e-12	3.66059e-10
Dpy19l1	9.79239e-12	3.68103e-10
Rab11fip5	9.81837e-12	3.68894e-10
AI413582	9.91118e-12	3.72193e-10
Tars	9.93317e-12	3.72831e-10
Tle3	9.94571e-12	3.73114e-10
Lfng	1.00193e-11	3.75686e-10
Mcm3	1.01543e-11	3.80557e-10
Dcun1d5	1.08408e-11	4.06079e-10
Rbm6	1.14881e-11	4.30113e-10
Sf3b3	1.15044e-11	4.30503e-10
Cdc16	1.1666e-11	4.36333e-10
Tcf3	1.22283e-11	4.57136e-10
Tmod3	1.28613e-11	4.80557e-10
Cttnbp2nl	1.30407e-11	4.87016e-10
Pygm	1.30598e-11	4.87485e-10
Syncrip	1.34832e-11	5.03039e-10
Uba52	1.36265e-11	5.08132e-10
[truncated: 2,325 more rows]
